# Supplementary material for: Electrochemical oxidative radical cascade reactions for the synthesis of difluoromethylated benzoxazines
Source: Royal Society of Chemistry journal article supplement (doi:10.1039/d3qo00731f), 2023-01-01

## Supporting Information

# Electrochemical oxidative radical cascade reactions for synthesis of difluoromethylated benzoxazines

Xiang Chen, Jun Jiang, Xiao-Jun Huang, and Wei-Min He\*

### Contents

|                                                                              |    |
|------------------------------------------------------------------------------|----|
| General information .....                                                    | 2  |
| General procedure for preparation of N-acyl-(2-ene)-anilines .....           | 2  |
| General procedure for the synthesis of difluoromethylated benzoxazines ..... | 2  |
| Investigation of reaction conditions .....                                   | 3  |
| Control experiments .....                                                    | 4  |
| The radical-radical coupling mechanism .....                                 | 5  |
| The pictures of reaction apparatuses .....                                   | 5  |
| References .....                                                             | 6  |
| Characterization Data for Products .....                                     | 6  |
| NMR spectra for compounds .....                                              | 16 |

## General information

Chromatography: HaiLang Silica Flash P60 size 40~63  $\mu\text{m}$  (200~300 mesh), TLC: HaiLang silica gel 60 (0.25mm). Visualization of the chromatogram was performed by UV, phosphomolybdic acid and  $\text{KMnO}_4$  staining. Mass spectra were recorded on Bruker UltiMate3000 & Compact, Thermo ISQ LT, LTQ XL and VELOS pro & ORBITRIP mass spectrometers.  $^1\text{H}$ ,  $^{13}\text{C}$ ,  $^{19}\text{F}$  were recorded on Bruker 500 using  $\text{CDCl}_3$  or  $\text{DMSO-d}_6$  as solvent. Chemical shift values are reported in ppm with the solvent resonance as the internal standard ( $\text{CDCl}_3$ :  $\delta$  7.26 for  $^1\text{H}$ ,  $\delta$  77.16 for  $^{13}\text{C}$ ). Data are reported as follows: chemical shifts, multiplicity (s = singlet, bs = broad singlet, d = doublet, dd = doublet of doublets, t = triplet, td = triplet of doublets, m = multiplet), coupling constants (Hz), and integration. If no special description, all reactions were conducted under air atmosphere. Starting materials were purchased from adamas and used without further purification.

### General procedure for preparation of N-acyl-(2-ene)-anilines

N-acyl-(2-ene)-anilines in the reactions were prepared with revised protocol according to the reported methods [1,2].

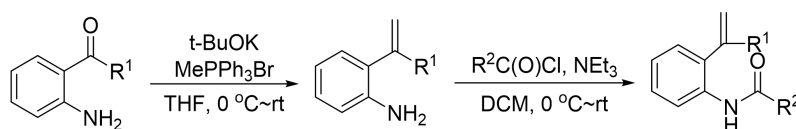

To a solution of methyltriphenylphosphonium bromide (5.36 g, 15.0 mmol) in dry THF (20.0 mL) under  $\text{N}_2$  atmosphere was added t-BuOK (1.68 g, 15.0 mmol) at 0 °C. The reaction medium was allowed to RT and stir for 0.5 h. 2-aminoacetophenone (1.35 g, 10.0 mmol) was dropwise added. The reaction medium was stirred at room temperature for 12 h. Upon completion of ketone, monitored by TLC, the medium was poured into hexane, stirred for 1.0 h, plugged through a silica pad. The filtrate was concentrated under reduced pressure, the crude product was purified with column chromatography on silica gel (200~300 mesh) and PE to PE/EA (20/1, v/v) as eluent to afford corresponding styrene. To a solution of styrene (0.99 g, 7.4 mmol) and  $\text{Et}_3\text{N}$  (1.53 g, 11.1 mmol) in DCM (15.00 mL) was dropwise added the solution of acyl chloride (8.90 mmol) in dichloromethane (5.00 mL) at 0 °C. After completion, the reaction mixture was purified via column chromatography to give **1a**.

### General procedure for the synthesis of difluoromethylated benzoxazines

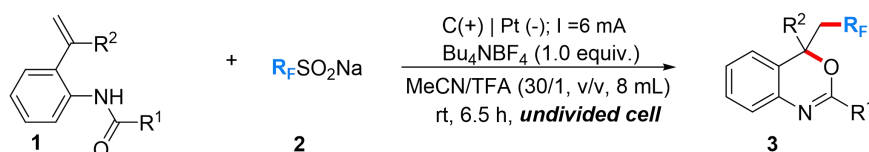

In an undivided flask (4 mL) equipped with a stir bar, N-acyl-(2-ene)-anilines **1** (0.3 mmol), Sodium fluoromethylsulfonate **2** (0.6 mmol),  $\text{Bu}_4\text{NBF}_4$  (0.3 mmol), MeCN/TFA (30/1, v/v, 8 mL) were added.

The flask was equipped with platinum cathode (20 mm × 10 mm × 0.1 mm) and graphite plate anode (20 mm × 10 mm × 0.1 mm). The reaction medium was stirred and electrolyzed at a constant current of 6 mA under RT for 6.5 h. After completion, the solvent was concentrated under reduced pressure, and the pure products **3** were obtained by flash chromatography on silica gel.

### Investigation of reaction conditions

Table S1 reaction conditions screening

| entry          | 1 (0.3 mmol) |    | 2 (m equiv.)                                         |                                                     | 3                                |                       |
|----------------|--------------|----|------------------------------------------------------|-----------------------------------------------------|----------------------------------|-----------------------|
|                | m            | x  | electrolyte (y)                                      | additive (z)                                        | solvent                          | yield of <b>3</b> / % |
| 1 <sup>a</sup> | 2.0          | Pt | <sup>n</sup> Bu <sub>4</sub> NBF <sub>4</sub> (1.0)  | --                                                  | MeCN                             | 0                     |
| 2              | 2.0          | Pt | <sup>n</sup> Bu <sub>4</sub> NBF <sub>4</sub> (1.0)  | --                                                  | MeCN                             | 38 <sup>b</sup>       |
| 3              | 2.0          | Ti | <sup>n</sup> Bu <sub>4</sub> NBF <sub>4</sub> (1.0)  | --                                                  | MeCN                             | 0                     |
| 4              | 2.0          | Cu | <sup>n</sup> Bu <sub>4</sub> NBF <sub>4</sub> (1.0)  | --                                                  | MeCN                             | 12                    |
| 5              | 2.0          | Ag | <sup>n</sup> Bu <sub>4</sub> NBF <sub>4</sub> (1.0)  | --                                                  | MeCN                             | trace                 |
| 6              | 2.0          | Ni | <sup>n</sup> Bu <sub>4</sub> NBF <sub>4</sub> (1.0)  | --                                                  | MeCN                             | trace                 |
| 7              | 2.0          | Zn | <sup>n</sup> Bu <sub>4</sub> NBF <sub>4</sub> (1.0)  | --                                                  | MeCN                             | 0                     |
| 8              | 2.0          | Al | <sup>n</sup> Bu <sub>4</sub> NBF <sub>4</sub> (1.0)  | --                                                  | MeCN                             | 22                    |
| 9              | 2.0          | Pt | <sup>n</sup> Bu <sub>4</sub> NBF <sub>4</sub> (2.0)  | --                                                  | MeCN                             | 24                    |
| 10             | 2.0          | Pt | <sup>n</sup> Bu <sub>4</sub> NPF <sub>6</sub> (1.0)  | --                                                  | MeCN                             | 40                    |
| 11             | 2.0          | Pt | <sup>n</sup> Bu <sub>4</sub> NI (1.0)                | --                                                  | MeCN                             | 0                     |
| 12             | 2.0          | Pt | <sup>n</sup> Bu <sub>4</sub> NHSO <sub>4</sub> (1.0) | --                                                  | MeCN                             | 31                    |
| 13             | 2.0          | Pt | LiClO <sub>4</sub> (1.0)                             | --                                                  | MeCN                             | 39                    |
| 14             | 2.0          | Pt | <sup>n</sup> Bu <sub>4</sub> NOAc (1.0)              | --                                                  | MeCN                             | 17                    |
| 15             | 2.0          | Pt | KPF <sub>6</sub> (1.0)                               | --                                                  | MeCN                             | 17                    |
| 16             | 2.0          | Pt | Et <sub>4</sub> NClO <sub>4</sub> (1.0)              | --                                                  | MeCN                             | 14                    |
| 17             | 2.0          | Pt | <sup>n</sup> Bu <sub>4</sub> NBF <sub>4</sub> (1.0)  | --                                                  | MeCN/HFIP (7/1, v/v)             | 14                    |
| 18             | 2.0          | Pt | <sup>n</sup> Bu <sub>4</sub> NBF <sub>4</sub> (1.0)  | --                                                  | MeCN/HOAc (7/1, v/v)             | 52 <sup>b</sup>       |
| 19             | 2.0          | Pt | <sup>n</sup> Bu <sub>4</sub> NBF <sub>4</sub> (1.0)  | --                                                  | MeCN/H <sub>2</sub> O (7/1, v/v) | 26                    |
| 20             | 2.0          | Pt | <sup>n</sup> Bu <sub>4</sub> NBF <sub>4</sub> (1.0)  | --                                                  | MeCN/DCM (7/1, v/v)              | 24                    |
| 21             | 2.0          | Pt | <sup>n</sup> Bu <sub>4</sub> NBF <sub>4</sub> (1.0)  | --                                                  | MeCN/DMF (7/1, v/v)              | 14                    |
| 22             | 2.0          | Pt | <sup>n</sup> Bu <sub>4</sub> NBF <sub>4</sub> (1.0)  | --                                                  | DMSO                             | 0                     |
| 23             | 2.0          | Pt | <sup>n</sup> Bu <sub>4</sub> NBF <sub>4</sub> (1.0)  | --                                                  | NMP                              | 0                     |
| 24             | 2.0          | Pt | <sup>n</sup> Bu <sub>4</sub> NBF <sub>4</sub> (1.0)  | --                                                  | DMF                              | 0                     |
| 25             | 2.5          | Pt | <sup>n</sup> Bu <sub>4</sub> NBF <sub>4</sub> (1.0)  | --                                                  | MeCN/HOAc (7/1, v/v)             | 59                    |
| 26             | 4.0          | Pt | <sup>n</sup> Bu <sub>4</sub> NBF <sub>4</sub> (1.0)  | --                                                  | MeCN/HOAc (7/1, v/v)             | 62                    |
| 27             | 2.0          | Pt | LiClO <sub>4</sub> (1.0)                             | --                                                  | MeCN/HOAc (7/1, v/v)             | 25                    |
| 28             | 2.0          | Pt | <sup>n</sup> Bu <sub>4</sub> NPF <sub>6</sub> (1.0)  | --                                                  | MeCN/HOAc (7/1, v/v)             | 44                    |
| 29             | 2.0          | Pt | <sup>n</sup> Bu <sub>4</sub> NBF <sub>4</sub> (1.0)  | --                                                  | MeCN/HOAc (6.5/1.5, v/v)         | 51                    |
| 30             | 4.0          | Pt | <sup>n</sup> Bu <sub>4</sub> NBF <sub>4</sub> (1.0)  | --                                                  | MeCN/HOAc (6/2, v/v)             | 52                    |
| 31             | 4.0          | Pt | <sup>n</sup> Bu <sub>4</sub> NBF <sub>4</sub> (1.0)  | TFA (3.0)                                           | MeCN/HOAc (7/1, v/v)             | 83                    |
| 32             | 4.0          | Pt | <sup>n</sup> Bu <sub>4</sub> NBF <sub>4</sub> (1.0)  | TCA (3.0)                                           | MeCN/HOAc (7/1, v/v)             | 70                    |
| 33             | 4.0          | Pt | <sup>n</sup> Bu <sub>4</sub> NBF <sub>4</sub> (1.0)  | LiClO <sub>4</sub> (1.0)                            | MeCN/HOAc (7/1, v/v)             | 79                    |
| 34             | 4.0          | Pt | <sup>n</sup> Bu <sub>4</sub> NBF <sub>4</sub> (0.5)  | LiClO <sub>4</sub> (0.5)                            | MeCN/HOAc (7/1, v/v)             | 74                    |
| 35             | 4.0          | Pt | <sup>n</sup> Bu <sub>4</sub> NBF <sub>4</sub> (0.5)  | <sup>n</sup> Bu <sub>4</sub> NBF <sub>4</sub> (0.5) | MeCN/HOAc (7/1, v/v)             | 50                    |
| 36             | 4.0          | Pt | <sup>n</sup> Bu <sub>4</sub> NBF <sub>4</sub> (0.5)  | Fe(Cp) <sub>2</sub> (0.1)                           | MeCN/HOAc (7/1, v/v)             | 56                    |
| 37             | 2.0          | Pt | <sup>n</sup> Bu <sub>4</sub> NBF <sub>4</sub> (1.0)  | --                                                  | HOAc                             | trace                 |
| 38             | 2.0          | Pt | <sup>n</sup> Bu <sub>4</sub> NBF <sub>4</sub> (1.0)  | --                                                  | TFA                              | trace                 |

Yields were determined by GC-MS with PhOMe as internal standard. a) CCE at 10 mA; b) isolated yield; c) 0.5 mmol scale.

## Control experiments

### 1. Radical capturing reactions

#### 1.1 Radical capturing experiment

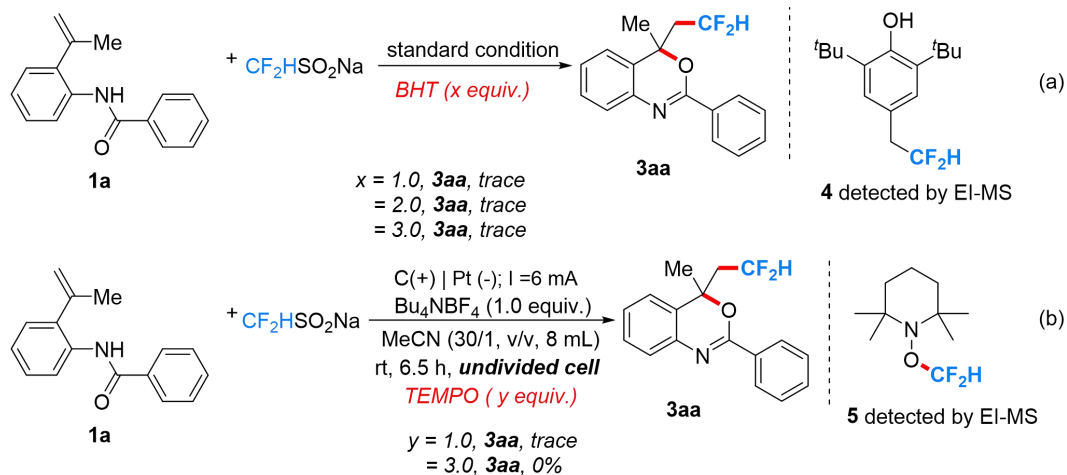

In an undivided flask (20 mL) equipped with a stir bar, N-acyl-(2-ene)-anilines **1** (0.3 mmol), Sodium fluoromethylsulfonate **2** (0.6 mmol),  $\text{Bu}_4\text{NBF}_4$  (0.3 mmol), BHT (3.0 equiv.) or TEMPO (3.0 equiv.) MeCN/TFA (30/1, v/v, 8 mL) or MeCN (8 mL) were added. The flask was equipped with platinum cathode (20 mm  $\times$  10 mm  $\times$  0.1 mm) and graphite plate anode (20 mm  $\times$  10 mm  $\times$  1 mm). The reaction medium was stirred and electrolyzed at a constant current of 6 mA under RT for 6.5 h. After completion, compound **3** was determined with trace amount when BHT was added, and 0% yield when TEMPO as radical scavengers and MeCN as solvent were added. Compound **4** and **5** could be determined by EI-MS.

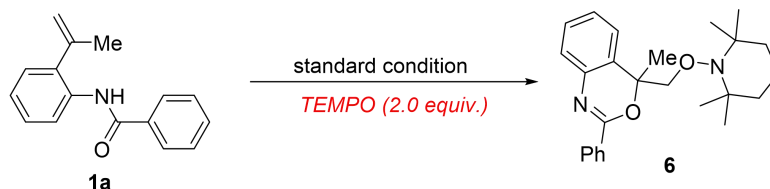

In an undivided flask (20 mL) equipped with a stir bar, N-acyl-(2-ene)-anilines **1** (0.3 mmol),  $\text{Bu}_4\text{NBF}_4$  (0.3 mmol), TEMPO (3.0 equiv.) MeCN (8 mL) were added. The flask was equipped with platinum cathode (20 mm  $\times$  10 mm  $\times$  0.1 mm) and graphite plate anode (20 mm  $\times$  10 mm  $\times$  1 mm). The reaction medium was stirred and electrolyzed at a constant current of 6 mA under RT for 6.5 h. After completion, Compound **6** could not be observed by HRMS.

#### 1.2 Self-coupling of 2a under standard condition

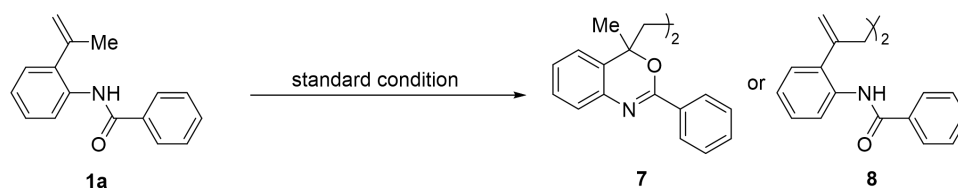

In an undivided flask (20 mL) equipped with a stir bar, N-acyl-(2-ene)-anilines **1** (0.3 mmol),  $\text{Bu}_4\text{NBF}_4$  (0.3 mmol), MeCN/TFA (30/1, v/v, 8 mL) or MeCN (8 mL) were added. The flask was

equipped with platinum cathode (20 mm × 10 mm × 0.1 mm) and graphite plate anode (20 mm × 10 mm × 1 mm). The reaction medium was stirred and electrolyzed at a constant current of 6 mA under RT for 6.5 h. After completion, Compound **7** could not be detected by HRMS, neither as compound **8**.

## 2. Cyclic Voltammetry Experiments

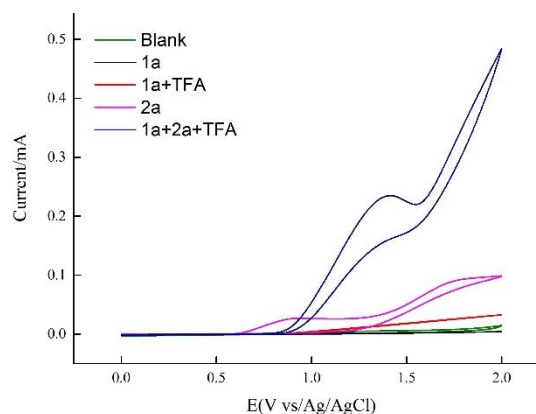

**Figure S1.** Cyclic Voltammogram (CV) Experiments

CV measurements were performed on a CHI 660E potentiostat, and the conditions are as follow: a glassy carbon disk working electrode (diameter, 3 mm), Pt disk and Ag/AgCl as counter and reference electrode. Cyclic voltammograms of reactants and their mixtures in 0.1 M LiClO<sub>4</sub> glassy carbon disk working electrode (diameter, 3 mm), Pt disk and Ag/AgCl (0.1 M in MeCN) as counter and reference electrode at 50 mV/s scan rate: 1) MeCN (8 mL) (green line), (2) 10 mM of **1a** in MeCN (8 mL) (black line), (3) 10 mM of **1a** in MeCN/TFA (30/1, v/v, 8 mL) (red line), (4) 10 mM of **2a** in MeCN (8 mL) (pink line), (5) 10 mM of **1a** and **2a** in MeCN/TFA (30/1, v/v, 8 mL) (blue line).

### The radical-radical coupling mechanism

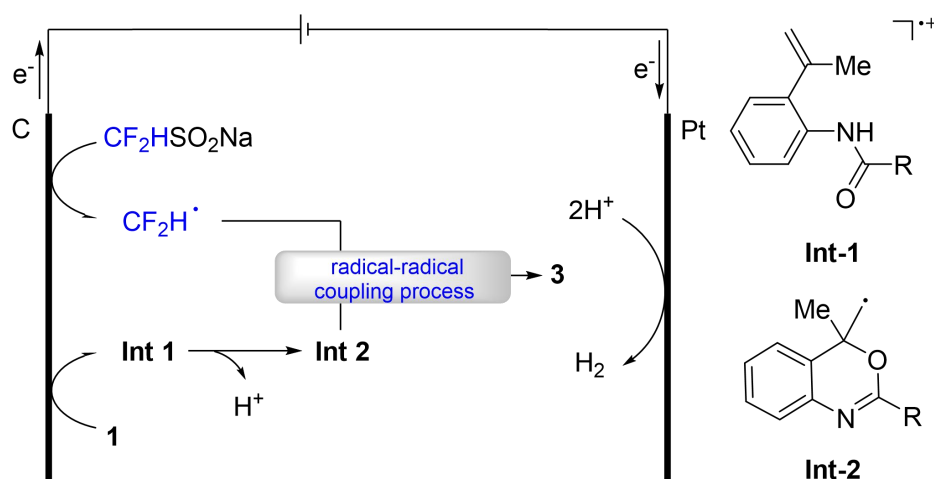

**Figure S2** the radical-radical coupling mechanism

### The pictures of reaction apparatuses

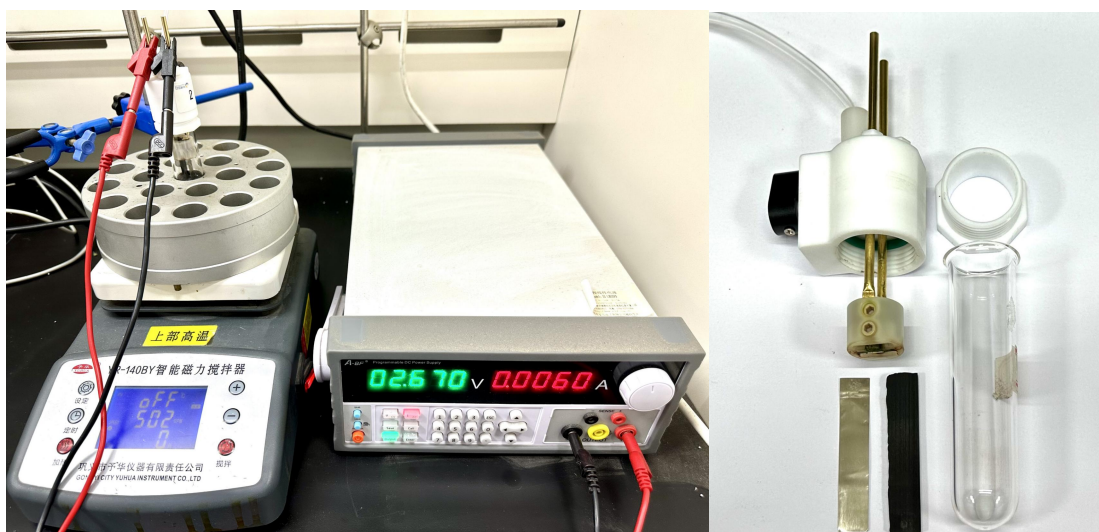

Figure S3 the pictures of reaction devices

## References

- [1] Q.-H. Deng, J.-R. Chen, Q. Wei, Q.-Q. Zhao, L.-Q. Lua and W.-J. Xiao, *Chem. Commun.*, 2015, **51**, 3537.
- [2] F. Lu, J. Xu, H. Li, K. Wang, D. Ouyang, L. Sun, M. Huang, J. Jiang, J. Hu, H. Alhumade, L. Lu and A. Lei, *Green Chem.*, 2021, **23**, 7982.

## Characterization Data for Products

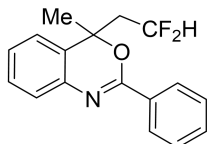

### 4-(2,2-Difluoroethyl)-4-methyl-2-phenyl-4H-benzo[d][1,3]oxazine (3aa)

Colorless oil, 82% yield,  $^1\text{H NMR}$  (500 MHz,  $\text{CDCl}_3$ )  $\delta$  8.18 – 8.10 (m, 2H), 7.54 – 7.49 (m, 1H), 7.46 (dd,  $J = 8.3, 6.6$  Hz, 2H), 7.34 (d,  $J = 4.3$  Hz, 2H), 7.26 – 7.20 (m, 1H), 7.12 (d,  $J = 7.6$  Hz, 1H), 6.15 – 5.86 (m, 1H), 2.69 – 2.44 (m, 2H), 1.79 (s, 3H).  $^{13}\text{C NMR}$  (126 MHz,  $\text{CDCl}_3$ )  $\delta$  155.9, 138.4, 132.5, 131.7, 129.3, 128.5, 128.5, 127.9, 127.1, 125.7, 122.7, 115.0 (t,  $J = 239.3$  Hz), 77.6 (t,  $J = 5.5$  Hz), 45.0 (t,  $J = 21.3$  Hz), 27.5.  $^{19}\text{F NMR}$  (471 MHz,  $\text{CDCl}_3$ )  $\delta$  -112.6 (d,  $J = 67.6$  Hz, 2F); HRMS: calcd for  $\text{C}_{17}\text{H}_{16}\text{F}_2\text{NO}^+ [\text{M}+\text{H}]^+$ , 288.1194, found 288.1189.

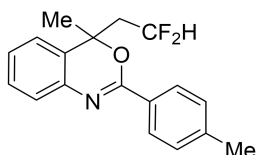

### 4-(2,2-Difluoroethyl)-4-methyl-2-(p-tolyl)-4H-benzo[d][1,3]oxazine (3ba)

Colorless oil, 76% yield,  $^1\text{H NMR}$  (500 MHz,  $\text{CDCl}_3$ )  $\delta$  8.05 – 7.99 (m, 2H), 7.36 – 7.30 (m, 2H), 7.25 (d,  $J = 7.9$  Hz, 2H), 7.23 – 7.18 (m, 1H), 7.13 – 7.08 (m, 1H), 6.00 (tdd,  $J = 55.8, 5.3, 3.9$  Hz, 1H), 2.66 – 2.45 (m, 2H), 2.41 (s, 3H), 1.78 (s, 4H).  $^{13}\text{C NMR}$  (126 MHz,  $\text{CDCl}_3$ )  $\delta$  156.1, 142.2, 138.6,

129.7, 129.3, 129.2, 128.6, 127.9, 126.9, 125.6, 122.7, 115.1 (t,  $J = 239.3$  Hz), 77.5 – 77.5 (m), 44.9 (t,  $J = 21.3$  Hz), 27.4, 21.7.  $^{19}\text{F}$  NMR (471 MHz,  $\text{CDCl}_3$ )  $\delta$  -111.9 – -113.3 (m, 2F). HRMS: calcd for  $\text{C}_{18}\text{H}_{18}\text{F}_2\text{NO}^+$   $[\text{M}+\text{H}]^+$ , 302.1351, found 302.1357.

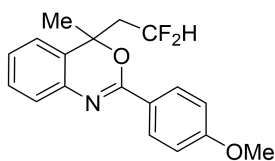

**4-(2,2-Difluoroethyl)-2-(4-methoxyphenyl)-4-methyl-4H-benzo[d][1,3]oxazine (3ca)**

Colorless oil, 84% yield,  $^1\text{H}$  NMR (500 MHz,  $\text{CDCl}_3$ )  $\delta$  8.13 – 8.03 (m, 2H), 7.36 – 7.29 (m, 2H), 7.21 (ddd,  $J = 7.6, 6.4, 2.2$  Hz, 1H), 7.11 (dd,  $J = 7.4, 1.2$  Hz, 1H), 6.99 – 6.93 (m, 2H), 6.01 (tdd,  $J = 55.7, 5.2, 4.0$  Hz, 1H), 3.87 (s, 3H), 2.67 – 2.43 (m, 2H), 1.79 (s, 3H).  $^{13}\text{C}$  NMR (126 MHz, Chloroform- $d$ )  $\delta$  162.6, 155.9, 138.8, 129.8, 129.3, 128.5, 126.6, 125.5, 124.9, 122.7, 115.1 (t,  $J = 239.3$  Hz), 113.8, 77.6 – 77.4 (m), 55.5, 44.9 (t,  $J = 21.3$  Hz), 27.3.  $^{19}\text{F}$  NMR (471 MHz, Chloroform- $d$ )  $\delta$  -110.4 – -113.6 (m, 2F). HRMS: calcd for  $\text{C}_{18}\text{H}_{18}\text{F}_2\text{NO}_2^+$   $[\text{M}+\text{H}]^+$ , 318.1300, found 318.1291.

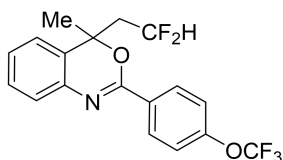

**4-(2,2-Difluoroethyl)-4-methyl-2-(4-(trifluoromethoxy)phenyl)-4H-benzo[d][1,3]oxazine (3da)**

Colorless oil, 83% yield,  $^1\text{H}$  NMR (500 MHz,  $\text{CDCl}_3$ )  $\delta$  8.22 – 8.13 (m, 2H), 7.38 – 7.31 (m, 2H), 7.28 (d,  $J = 8.5$  Hz, 2H), 7.27 – 7.22 (m, 1H), 7.12 (dd,  $J = 7.7, 1.2$  Hz, 1H), 5.97 (tdd,  $J = 55.7, 5.2, 4.0$  Hz, 1H), 2.71 – 2.38 (m, 2H), 1.80 (s, 3H).  $^{13}\text{C}$  NMR (126 MHz,  $\text{CDCl}_3$ )  $\delta$  154.7, 151.7, 138.2, 131.0, 129.7, 129.4, 128.3, 127.4, 125.9, 122.8, 120.5 (q,  $J = 258.0$  Hz), 120.5, 115.0 (t,  $J = 239.4$  Hz), 78.0 (t,  $J = 6.0$  Hz), 45.1 (t,  $J = 21.4$  Hz), 27.7.  $^{19}\text{F}$  NMR (471 MHz,  $\text{CDCl}_3$ )  $\delta$  -57.6 (s, 3F), -112.7 – -112.7 (m, 2F). HRMS: calcd for  $\text{C}_{18}\text{H}_{15}\text{F}_5\text{NO}_2^+$   $[\text{M}+\text{H}]^+$ , 372.1017, found 372.1010.

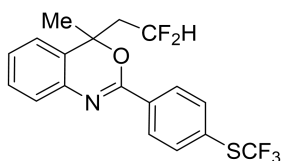

**4-(2,2-Difluoroethyl)-4-methyl-2-(4-(trifluoromethylthio)phenyl)-4H-benzo[d][1,3]oxazine (3ea)**

Colorless oil, 75% yield,  $^1\text{H}$  NMR (500 MHz,  $\text{CDCl}_3$ )  $\delta$  8.17 (d,  $J = 8.2$  Hz, 2H), 7.73 (d,  $J = 8.1$  Hz, 2H), 7.39 – 7.31 (m, 2H), 7.26 (td,  $J = 7.0, 2.2$  Hz, 1H), 7.13 (d,  $J = 7.6$  Hz, 1H), 5.97 (tt,  $J = 55.7, 4.6$  Hz, 1H), 2.69 – 2.42 (m, 2H), 1.80 (s, 3H).  $^{13}\text{C}$  NMR (126 MHz,  $\text{CDCl}_3$ )  $\delta$  154.7, 138.1, 135.9, 134.9, 129.5 (q,  $J = 308.4$  Hz), 129.5, 128.8, 128.3, 128.0 (q,  $J = 2.1$  Hz), 127.7, 126.0, 122.8, 115.0 (t,  $J = 239.5$  Hz), 78.1 (t,  $J = 6.1$  Hz), 45.1 (t,  $J = 21.4$  Hz), 27.8.  $^{19}\text{F}$  NMR (471 MHz,  $\text{CDCl}_3$ )  $\delta$  -42.1 (s, 3F), -112.6 – -112.8 (m, 2F). HRMS: calcd for  $\text{C}_{18}\text{H}_{15}\text{F}_5\text{NOS}^+$   $[\text{M}+\text{H}]^+$ , 388.0789, found 388.0796.

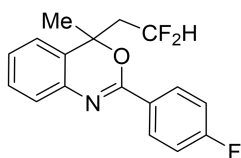

**4-(2,2-Difluoroethyl)-2-(4-fluorophenyl)-4-methyl-4H-benzo[d][1,3]oxazine (3fa)**

Colorless oil, 65% yield,  $^1\text{H}$  NMR (500 MHz,  $\text{CDCl}_3$ )  $\delta$  8.17 – 8.10 (m, 2H), 7.37 – 7.29 (m, 2H), 7.27 – 7.20 (m, 1H), 7.12 (td,  $J = 8.3, 2.1$  Hz, 3H), 5.98 (tt,  $J = 55.7, 4.6$  Hz, 1H), 2.65 – 2.41 (m, 2H), 1.79 (s, 3H).  $^{13}\text{C}$  NMR (126 MHz,  $\text{CDCl}_3$ )  $\delta$  165.0 (d,  $J = 252.3$  Hz), 155.0, 138.3, 130.1 (d,  $J = 9.0$  Hz), 129.3, 128.6 (d,  $J = 3.0$  Hz), 128.2, 127.1, 125.6, 122.7, 115.5 (d,  $J = 22.0$  Hz), 114.9 (t,  $J = 239.4$  Hz), 77.7 (t,  $J = 6.0$  Hz), 44.9 (t,  $J = 21.3$  Hz), 27.5.  $^{19}\text{F}$  NMR (471 MHz,  $\text{CDCl}_3$ )  $\delta$  -108.0 (s, 1F), -112.7 (d,  $J = 30.1$  Hz, 2F). HRMS: calcd for  $\text{C}_{17}\text{H}_{15}\text{F}_3\text{NO}^+ [\text{M}+\text{H}]^+$ , 306.1100, found 306.1107.

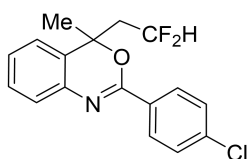

**2-(4-Chlorophenyl)-4-(2,2-difluoroethyl)-4-methyl-4H-benzo[d][1,3]oxazine (3ga)**

Colorless oil, 77% yield,  $^1\text{H}$  NMR (500 MHz,  $\text{CDCl}_3$ )  $\delta$  8.10 – 8.03 (m, 2H), 7.44 – 7.39 (m, 2H), 7.37 – 7.30 (m, 2H), 7.27 – 7.21 (m, 1H), 7.11 (dd,  $J = 7.7, 1.3$  Hz, 1H), 6.14 – 5.78 (m, 1H), 2.69 – 2.38 (m, 2H), 1.79 (s, 3H).  $^{13}\text{C}$  NMR (126 MHz,  $\text{CDCl}_3$ )  $\delta$  155.0, 138.3, 137.9, 131.0, 129.4, 129.3, 128.7, 128.4, 127.3, 125.8, 122.8, 115.0 (t,  $J = 239.4$  Hz), 77.9 (t,  $J = 6.0$  Hz), 45.1 (t,  $J = 21.4$  Hz), 27.6.  $^{19}\text{F}$  NMR (471 MHz,  $\text{CDCl}_3$ )  $\delta$  -111.3 – -113.8 (m, 2F). HRMS: calcd for  $\text{C}_{17}\text{H}_{15}\text{ClF}_2\text{NO}^+ [\text{M}+\text{H}]^+$ , 322.0805, found 322.0796.

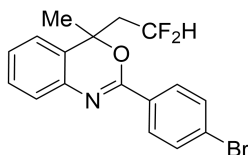

**2-(4-Bromophenyl)-4-(2,2-difluoroethyl)-4-methyl-4H-benzo[d][1,3]oxazine (3ha)**

Colorless oil, 79% yield,  $^1\text{H}$  NMR (500 MHz,  $\text{CDCl}_3$ )  $\delta$  7.91 (d,  $J = 8.6$  Hz, 2H), 7.50 (d,  $J = 8.6$  Hz, 2H), 7.29 – 7.22 (m, 2H), 7.19 – 7.14 (m, 1H), 7.03 (dd,  $J = 7.6, 1.3$  Hz, 1H), 5.89 (tdd,  $J = 55.7, 5.2, 4.0$  Hz, 1H), 2.65 – 2.25 (m, 2H), 1.71 (s, 3H).  $^{13}\text{C}$  NMR (126 MHz,  $\text{CDCl}_3$ )  $\delta$  155.1, 138.2, 132.5, 131.7, 131.4, 129.5, 129.4, 128.3, 127.4, 126.5, 125.8, 122.8, 115.0 (t,  $J = 239.4$  Hz), 77.9 (t,  $J = 6.0$  Hz), 45.0 (t,  $J = 21.4$  Hz), 27.6.  $^{19}\text{F}$  NMR (471 MHz,  $\text{CDCl}_3$ )  $\delta$  -112.7 (d,  $J = 25.0$  Hz, 2F). HRMS: calcd for  $\text{C}_{17}\text{H}_{14}\text{BrF}_2\text{NNaO}^+ [\text{M}+\text{Na}]^+$ , 388.0119, found 388.0121.

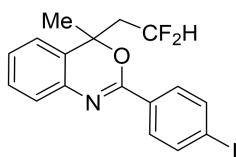

**4-(2,2-Difluoroethyl)-2-(4-iodophenyl)-4-methyl-4H-benzo[d][1,3]oxazine (3ia)**



Colorless oil, 72% yield,  $^1\text{H}$  NMR (500 MHz,  $\text{CDCl}_3$ )  $\delta$  7.85 (d,  $J = 8.6$  Hz, 2H), 7.79 (d,  $J = 8.4$  Hz, 2H), 7.38 – 7.29 (m, 2H), 7.24 (td,  $J = 7.6, 7.2, 2.0$  Hz, 1H), 7.11 (dd,  $J = 7.7, 1.3$  Hz, 1H), 6.11 – 5.82 (m, 1H), 2.67 – 2.38 (m, 2H), 1.79 (s, 3H).  $^{13}\text{C}$  NMR (126 MHz,  $\text{CDCl}_3$ )  $\delta$  155.3, 138.2, 137.7, 132.0, 129.5, 129.4, 128.4, 127.4, 125.8, 122.8, 115.0 (t,  $J = 239.5$  Hz), 98.9, 77.9 (t,  $J = 6.1$  Hz), 45.0 (t,  $J = 21.3$  Hz), 27.6.  $^{19}\text{F}$  NMR (471 MHz,  $\text{CDCl}_3$ )  $\delta$  -111.7 – -113.7 (m, 2F). HRMS: calcd for  $\text{C}_{17}\text{H}_{15}\text{F}_2\text{INO}^+ [\text{M}+\text{H}]^+$ , 414.0161, found 414.0160.

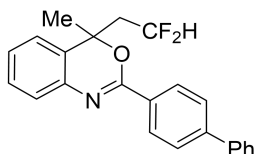

**2-((1,1'-Biphenyl)-4-yl)-4-(2,2-difluoroethyl)-4-methyl-4H-benzo[d][1,3]oxazine (3ja)**

Colorless oil, 74% yield,  $^1\text{H}$  NMR (500 MHz,  $\text{CDCl}_3$ )  $\delta$  8.20 (d,  $J = 8.3$  Hz, 2H), 7.68 (d,  $J = 8.3$  Hz, 2H), 7.66 – 7.62 (m, 2H), 7.47 (t,  $J = 7.6$  Hz, 2H), 7.41 – 7.31 (m, 3H), 7.26 – 7.20 (m, 1H), 7.12 (d,  $J = 7.6$  Hz, 1H), 6.03 (tt,  $J = 55.7, 4.6$  Hz, 1H), 2.71 – 2.43 (m, 2H), 1.81 (s, 3H).  $^{13}\text{C}$  NMR (126 MHz,  $\text{CDCl}_3$ )  $\delta$  155.8, 144.4, 140.3, 138.5, 131.3, 129.3, 129.0, 128.5, 128.4, 128.0, 127.3, 127.1, 127.1, 125.7, 122.7, 115.1 (t,  $J = 239.4$  Hz), 77.6 (t,  $J = 6.0$  Hz), 45.0 (t,  $J = 21.3$  Hz), 27.5.  $^{19}\text{F}$  NMR (471 MHz,  $\text{CDCl}_3$ )  $\delta$  -111.7 – -113.6 (m, 2F). HRMS: calcd for  $\text{C}_{23}\text{H}_{20}\text{F}_2\text{NO}^+ [\text{M}+\text{H}]^+$ , 364.1507, found 364.1505.

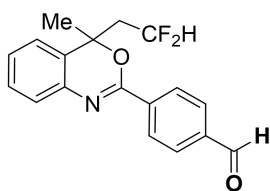

**4-(4-(2,2-Difluoroethyl)-4-methyl-4H-benzo[d][1,3]oxazin-2-yl)benzaldehyde (3ka)**

Colorless oil, 68% yield,  $^1\text{H}$  NMR (500 MHz,  $\text{CDCl}_3$ )  $\delta$  10.09 (s, 1H), 8.29 (d,  $J = 8.1$  Hz, 2H), 7.95 (d,  $J = 8.1$  Hz, 2H), 7.36 (d,  $J = 4.2$  Hz, 2H), 7.27 (dt,  $J = 8.5, 4.2$  Hz, 1H), 7.13 (d,  $J = 7.6$  Hz, 1H), 5.98 (tt,  $J = 55.7, 4.6$  Hz, 1H), 2.66 – 2.47 (m, 2H), 1.82 (s, 3H).  $^{13}\text{C}$  NMR (126 MHz,  $\text{CDCl}_3$ )  $\delta$  191.9, 154.7, 138.3, 138.1, 138.0, 129.6, 129.5, 128.5, 128.4, 127.8, 126.2, 122.8, 115.0 (t,  $J = 239.5$  Hz), 78.2 (t,  $J = 6.0$  Hz), 45.3 (t,  $J = 21.5$  Hz), 27.8.  $^{19}\text{F}$  NMR (471 MHz,  $\text{CDCl}_3$ )  $\delta$  -112.5 – -112.9 (m, 2F). HRMS: calcd for  $\text{C}_{18}\text{H}_{16}\text{F}_2\text{NO}_2^+ [\text{M}+\text{H}]^+$ , 316.1144, found 316.1139.

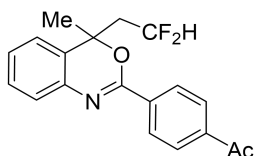

**1-(4-(4-(2,2-Difluoroethyl)-4-methyl-4H-benzo[d][1,3]oxazin-2-yl)phenyl)ethan-1-one (3la)**

Colorless oil, 84% yield,  $^1\text{H}$  NMR (500 MHz,  $\text{CDCl}_3$ )  $\delta$  8.22 (d,  $J = 8.3$  Hz, 2H), 8.03 (d,  $J = 8.4$  Hz, 2H), 7.39 – 7.33 (m, 2H), 7.27 (ddd,  $J = 8.5, 5.5, 3.2$  Hz, 1H), 7.14 (d,  $J = 7.6$  Hz, 1H), 6.14 – 5.84 (m, 1H), 2.66 (s, 3H), 2.64 – 2.45 (m, 2H), 1.82 (s, 3H).  $^{13}\text{C}$  NMR (126 MHz,  $\text{CDCl}_3$ )  $\delta$  197.9, 154.9, 139.1,

138.1, 136.6, 129.5, 128.4, 128.3, 128.1, 127.7, 126.0, 122.8, 115.0 (t,  $J = 239.5$  Hz), 78.0 (t,  $J = 6.1$  Hz), 45.1 (t,  $J = 21.4$  Hz), 27.7, 27.0.  $^{19}\text{F}$  NMR (471 MHz,  $\text{CDCl}_3$ )  $\delta$  -112.7 (d,  $J = 25.8$  Hz, 2F). HRMS: calcd for  $\text{C}_{19}\text{H}_{18}\text{F}_2\text{NO}_2^+$   $[\text{M}+\text{H}]^+$ , 330.1300, found 330.1303.

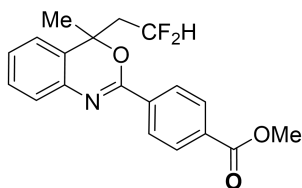

***Methyl 4-(4-(2,2-difluoroethyl)-4-methyl-4H-benzo[d][1,3]oxazin-2-yl)benzoate (3ma)***

Colorless oil, 80% yield,  $^1\text{H}$  NMR (500 MHz,  $\text{CDCl}_3$ )  $\delta$  8.20 (d,  $J = 8.3$  Hz, 2H), 8.11 (d,  $J = 8.3$  Hz, 2H), 7.39 – 7.33 (m, 2H), 7.26 (td,  $J = 6.4, 5.6, 2.9$  Hz, 1H), 7.13 (d,  $J = 7.6$  Hz, 1H), 5.99 (tt,  $J = 55.7, 4.6$  Hz, 1H), 3.95 (s, 3H), 2.69 – 2.44 (m, 2H), 1.82 (s, 3H).  $^{13}\text{C}$  NMR (126 MHz,  $\text{CDCl}_3$ )  $\delta$  166.7, 155.0, 138.1, 136.6, 132.6, 129.6, 129.5, 128.4, 127.8, 127.6, 126.0, 122.8, 115.0 (t,  $J = 239.5$  Hz), 78.0 (t,  $J = 6.1$  Hz), 52.5, 45.1 (t,  $J = 21.3$  Hz), 27.8.  $^{19}\text{F}$  NMR (471 MHz,  $\text{CDCl}_3$ )  $\delta$  -112.7 (d,  $J = 29.6$  Hz, 2F). HRMS: calcd for  $\text{C}_{19}\text{H}_{18}\text{F}_2\text{NO}_3^+$   $[\text{M}+\text{H}]^+$ , 346.1249, found 346.1253.

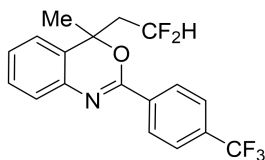

***4-(2,2-Difluoroethyl)-4-methyl-2-(4-(trifluoromethyl)phenyl)-4H-benzo[d][1,3]oxazine (3na)***

Colorless oil, 67% yield,  $^1\text{H}$  NMR (500 MHz,  $\text{CDCl}_3$ )  $\delta$  8.25 (d,  $J = 8.2$  Hz, 2H), 7.71 (d,  $J = 8.2$  Hz, 2H), 7.39 – 7.33 (m, 2H), 7.27 (ddd,  $J = 8.5, 6.0, 2.8$  Hz, 1H), 7.13 (d,  $J = 7.6$  Hz, 1H), 5.97 (tt,  $J = 55.7, 4.6$  Hz, 1H), 2.76 – 2.36 (m, 2H), 1.81 (s, 3H).  $^{13}\text{C}$  NMR (126 MHz,  $\text{CDCl}_3$ )  $\delta$  154.5, 138.0, 135.9, 133.1 (q,  $J = 32.6$  Hz), 129.5, 128.3, 128.2, 127.7, 126.0, 124.0 (q,  $J = 272.4$  Hz), 125.4 (q,  $J = 3.8$  Hz), 122.8, 115.0 (t,  $J = 239.5$  Hz), 78.1 (t,  $J = 6.0$  Hz), 45.2 (t,  $J = 21.4$  Hz), 27.8.  $^{19}\text{F}$  NMR (471 MHz,  $\text{CDCl}_3$ )  $\delta$  -62.8 (s, 3F), -112.6 – -112.9 (m, 2F). HRMS: calcd for  $\text{C}_{18}\text{H}_{15}\text{F}_5\text{NO}^+$   $[\text{M}+\text{H}]^+$ , 356.1068, found 356.1073.

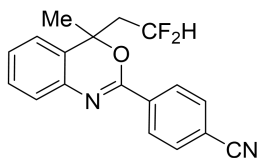

***4-(4-(2,2-Difluoroethyl)-4-methyl-4H-benzo[d][1,3]oxazin-2-yl)benzonitrile (3oa)***

Colorless oil, 74% yield,  $^1\text{H}$  NMR (500 MHz,  $\text{CDCl}_3$ )  $\delta$  8.24 (d,  $J = 8.3$  Hz, 2H), 7.74 (d,  $J = 8.3$  Hz, 2H), 7.39 – 7.32 (m, 2H), 7.28 (td,  $J = 7.6, 2.1$  Hz, 1H), 5.96 (tt,  $J = 55.6, 4.6$  Hz, 1H), 2.71 – 2.43 (m, 2H), 1.82 (s, 3H).  $^{13}\text{C}$  NMR (126 MHz,  $\text{CDCl}_3$ )  $\delta$  154.0, 137.8, 136.6, 132.2, 129.6, 128.3, 128.2, 128.0, 126.1, 122.9, 118.6, 114.9 (t,  $J = 239.6$  Hz), 114.7, 78.3 (t,  $J = 6.0$  Hz), 45.2 (t,  $J = 21.4$  Hz), 27.9.  $^{19}\text{F}$  NMR (471 MHz,  $\text{CDCl}_3$ )  $\delta$  -112.7 (d,  $J = 3.1$  Hz, 2F). HRMS: calcd for  $\text{C}_{18}\text{H}_{15}\text{F}_2\text{N}_2\text{O}^+$   $[\text{M}+\text{H}]^+$ , 313.1147, found 313.1150.

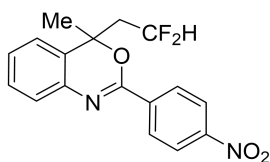

**4-(2,2-Difluoroethyl)-4-methyl-2-(4-nitrophenyl)-4H-benzo[d][1,3]oxazine (3pa)**

Colorless oil, 54% yield,  $^1\text{H}$  NMR (500 MHz,  $\text{CDCl}_3$ )  $\delta$  8.30 (s, 4H), 7.40 – 7.34 (m, 2H), 7.31 – 7.27 (m, 1H), 7.16 – 7.11 (m, 1H), 5.96 (tt,  $J = 55.7, 4.6$  Hz, 1H), 2.67 – 2.45 (m, 2H), 1.83 (s, 3H).  $^{13}\text{C}$  NMR (126 MHz,  $\text{CDCl}_3$ )  $\delta$  153.8, 149.7, 138.4, 137.8, 129.6, 128.8, 128.2, 128.2, 126.3, 123.6, 122.9, 114.9 (t,  $J = 239.6$  Hz), 78.4 (d,  $J = 6.2$  Hz), 45.3 (t,  $J = 21.5$  Hz), 28.0.  $^{19}\text{F}$  NMR (471 MHz,  $\text{CDCl}_3$ )  $\delta$  -112.6 – -112.9 (m, 2F). HRMS: calcd for  $\text{C}_{17}\text{H}_{15}\text{F}_2\text{N}_2\text{O}_3^+$   $[\text{M}+\text{H}]^+$ , 333.1045, found 333.1049.

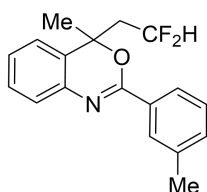

**4-(2,2-Difluoroethyl)-4-methyl-2-(m-tolyl)-4H-benzo[d][1,3]oxazine (3qa)**

Colorless oil, 79% yield,  $^1\text{H}$  NMR (500 MHz,  $\text{CDCl}_3$ )  $\delta$  7.96 (d,  $J = 2.1$  Hz, 1H), 7.93 – 7.89 (m, 1H), 7.37 – 7.30 (m, 4H), 7.22 (dt,  $J = 8.4, 4.3$  Hz, 1H), 7.11 (d,  $J = 7.6$  Hz, 1H), 6.00 (tdd,  $J = 55.7, 5.2, 3.9$  Hz, 1H), 2.67 – 2.44 (m, 2H), 2.43 (s, 3H), 1.79 (s, 3H).  $^{13}\text{C}$  NMR (126 MHz,  $\text{CDCl}_3$ )  $\delta$  156.2, 138.5, 138.2, 132.6, 132.4, 129.3, 128.5, 128.5, 128.4, 127.0, 125.7, 125.1, 122.7, 115.1 (t,  $J = 239.3$  Hz), 77.6 (d,  $J = 6.0$  Hz), 45.0 (t,  $J = 21.3$  Hz), 27.5, 21.6.  $^{19}\text{F}$  NMR (471 MHz,  $\text{CDCl}_3$ )  $\delta$  -111.5 – -113.6 (m, 2F). HRMS: calcd for  $\text{C}_{18}\text{H}_{18}\text{F}_2\text{NO}^+$   $[\text{M}+\text{H}]^+$ , 302.1351, found 302.1351.

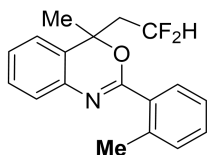

**4-(2,2-Difluoroethyl)-4-methyl-2-(o-tolyl)-4H-benzo[d][1,3]oxazine (3ra)**

Colorless oil, 79% yield,  $^1\text{H}$  NMR (500 MHz,  $\text{CDCl}_3$ )  $\delta$  7.77 (dd,  $J = 7.8, 1.5$  Hz, 1H), 7.37 – 7.29 (m, 3H), 7.29 – 7.22 (m, 3H), 7.11 (dd,  $J = 7.7, 1.2$  Hz, 1H), 5.96 (tdd,  $J = 55.8, 5.2, 4.0$  Hz, 1H), 2.68 – 2.52 (m, 5H), 1.79 (s, 3H).  $^{13}\text{C}$  NMR (126 MHz,  $\text{CDCl}_3$ )  $\delta$  157.7, 138.3, 132.4, 131.6, 130.6, 129.6, 129.3, 127.8, 127.2, 125.9, 125.8, 122.7, 115.2 (d,  $J = 239.7$  Hz), 78.0 (d,  $J = 6.2$  Hz), 45.1 (t,  $J = 21.5$  Hz), 28.1, 21.7.  $^{19}\text{F}$  NMR (471 MHz,  $\text{CDCl}_3$ )  $\delta$  -112.5 – -112.9 (m, 2F). HRMS: calcd for  $\text{C}_{18}\text{H}_{18}\text{F}_2\text{NO}^+$   $[\text{M}+\text{H}]^+$ , 302.1351, found 302.1349.

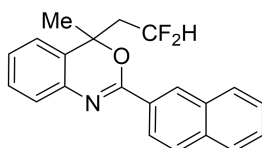

**4-(2,2-Difluoroethyl)-4-methyl-2-(naphthalen-2-yl)-4H-benzo[d][1,3]oxazine (3sa)**

Colorless oil, 59% yield,  $^1\text{H}$  NMR (500 MHz,  $\text{CDCl}_3$ )  $\delta$  8.59 (d,  $J = 1.6$  Hz, 1H), 8.26 (dd,  $J = 8.7, 1.6$  Hz, 1H), 7.98 (dd,  $J = 7.3, 2.0$  Hz, 1H), 7.90 (dd,  $J = 12.0, 8.4$  Hz, 2H), 7.56 (tt,  $J = 7.2, 5.4$  Hz, 2H), 7.41 – 7.34 (m, 2H), 7.28 – 7.23 (m, 1H), 7.15 (d,  $J = 7.6$  Hz, 1H), 6.22 – 5.91 (m, 1H), 2.74 – 2.47 (m, 2H), 1.86 (s, 3H).  $^{13}\text{C}$  NMR (126 MHz,  $\text{CDCl}_3$ )  $\delta$  156.0, 138.6, 135.1, 132.9, 129.8, 129.4, 129.2, 128.6, 128.5, 128.2, 127.9, 127.8, 127.2, 126.6, 125.8, 124.5, 122.8, 115.1 (t,  $J = 239.4$  Hz), 77.8 (d,  $J = 6.0$  Hz), 45.0 (t,  $J = 21.3$  Hz), 27.6.  $^{19}\text{F}$  NMR (471 MHz,  $\text{CDCl}_3$ )  $\delta$  -112.4 – -112.8 (m, 2F). HRMS: calcd for  $\text{C}_{21}\text{H}_{18}\text{F}_2\text{NO}^+$   $[\text{M}+\text{H}]^+$ , 338.1351, found 338.1361.

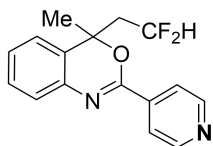

**4-(2,2-Difluoroethyl)-4-methyl-2-(pyridin-4-yl)-4H-benzo[d][1,3]oxazine (3ta)**

Colorless oil, 69% yield,  $^1\text{H}$  NMR (500 MHz,  $\text{CDCl}_3$ )  $\delta$  8.75 (s, 2H), 7.95 (d,  $J = 5.2$  Hz, 2H), 7.35 (d,  $J = 3.2$  Hz, 2H), 7.30 – 7.26 (m, 1H), 7.13 (d,  $J = 7.6$  Hz, 1H), 5.96 (tt,  $J = 55.5, 4.6$  Hz, 1H), 2.71 – 2.41 (m, 2H), 1.81 (s, 3H).  $^{13}\text{C}$  NMR (126 MHz,  $\text{CDCl}_3$ )  $\delta$  153.9, 150.3, 140.1, 137.7, 129.5, 128.4, 128.1, 126.3, 122.9, 121.5, 114.9 (t,  $J = 239.6$  Hz), 78.3 (t,  $J = 6.0$  Hz), 45.4 (t,  $J = 21.6$  Hz), 27.9.  $^{19}\text{F}$  NMR (471 MHz,  $\text{CDCl}_3$ )  $\delta$  -112.1 – -113.4 (m, 2F). HRMS: calcd for  $\text{C}_{16}\text{H}_{15}\text{F}_2\text{N}_2\text{O}^+$   $[\text{M}+\text{H}]^+$ , 289.1147, found 289.1151.

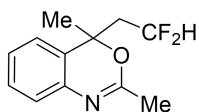

**4-(2,2-Difluoroethyl)-2,4-dimethyl-4H-benzo[d][1,3]oxazine (3ua)**

Colorless oil, 86% yield,  $^1\text{H}$  NMR (500 MHz,  $\text{CDCl}_3$ )  $\delta$  7.31 – 7.25 (m, 1H), 7.21 – 7.11 (m, 2H), 7.04 (d,  $J = 7.6$  Hz, 1H), 5.88 (tt,  $J = 56.2, 4.4$  Hz, 1H), 2.42 (dq,  $J = 52.1, 15.0, 4.5$  Hz, 2H), 2.12 (s, 3H), 1.70 (s, 3H).  $^{13}\text{C}$  NMR (126 MHz,  $\text{CDCl}_3$ )  $\delta$  159.5, 137.9, 129.3, 127.6, 126.9, 124.9, 122.8, 115.1 (t,  $J = 239.1$  Hz), 77.2 (t,  $J = 6.2$  Hz), 45.7 (t,  $J = 21.2$  Hz), 28.0, 21.8.  $^{19}\text{F}$  NMR (471 MHz,  $\text{CDCl}_3$ )  $\delta$  -112.7 (d,  $J = 12.3$  Hz, 2F). HRMS: calcd for  $\text{C}_{12}\text{H}_{14}\text{F}_2\text{NO}^+$   $[\text{M}+\text{H}]^+$ , 226.1038, found 226.1041.

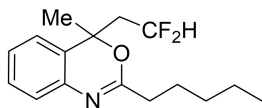

**4-(2,2-Difluoroethyl)-4-methyl-2-pentyl-4H-benzo[d][1,3]oxazine (3va)**

Colorless oil, 80% yield,  $^1\text{H}$  NMR (500 MHz,  $\text{CDCl}_3$ )  $\delta$  7.30 – 7.25 (m, 1H), 7.20 – 7.14 (m, 2H), 7.04 (d,  $J = 7.5$  Hz, 1H), 5.89 (tdd,  $J = 55.8, 5.5, 3.7$  Hz, 1H), 2.56 – 2.37 (m, 2H), 2.37 – 2.32 (m, 2H), 1.82 – 1.63 (m, 5H), 1.41 – 1.32 (m, 4H), 0.95 – 0.87 (m, 3H).  $^{13}\text{C}$  NMR (126 MHz,  $\text{CDCl}_3$ )  $\delta$  162.3, 137.9, 129.2, 127.8, 126.8, 125.0, 122.7, 115.1 (t,  $J = 239.1$  Hz), 77.0 (dd,  $J = 7.1, 5.2$  Hz), 45.3 (t,  $J = 21.3$  Hz), 35.5, 31.6, 28.0, 26.0, 22.5, 14.1.  $^{19}\text{F}$  NMR (471 MHz,  $\text{CDCl}_3$ )  $\delta$  -112.7 (d,  $J = 69.3$  Hz, 2F). HRMS: calcd for  $\text{C}_{16}\text{H}_{22}\text{F}_2\text{NO}^+$   $[\text{M}+\text{H}]^+$ , 282.1664, found 282.1667.

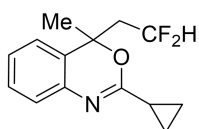

**2-Cyclopropyl-4-(2,2-difluoroethyl)-4-methyl-4H-benzo[d][1,3]oxazine (3wa)**

Colorless oil, 83% yield,  $^1\text{H}$  NMR (500 MHz,  $\text{CDCl}_3$ )  $\delta$  7.27 (td,  $J = 7.6, 1.4$  Hz, 1H), 7.14 (t,  $J = 7.1$  Hz, 2H), 7.05 – 6.98 (m, 1H), 5.84 (tdd,  $J = 55.8, 5.3, 3.8$  Hz, 1H), 2.57 – 2.29 (m, 2H), 1.71 (tt,  $J = 8.3, 4.8$  Hz, 1H), 1.63 (s, 3H), 1.04 (dt,  $J = 6.9, 3.3$  Hz, 2H), 0.87 (dq,  $J = 7.1, 3.7$  Hz, 2H).  $^{13}\text{C}$  NMR (126 MHz,  $\text{CDCl}_3$ )  $\delta$  162.5, 138.3, 129.3, 127.8, 126.3, 124.5, 122.6, 115.1 (t,  $J = 239.1$  Hz), 45.0 (t,  $J = 21.4$  Hz), 27.7, 14.7, 7.0, 6.9.  $^{19}\text{F}$  NMR (471 MHz,  $\text{CDCl}_3$ )  $\delta$  -112.4 – -112.8 (m, 2F). HRMS: calcd for  $\text{C}_{14}\text{H}_{16}\text{F}_2\text{NO}^+$   $[\text{M}+\text{H}]^+$ , 252.1194, found 252.1191.

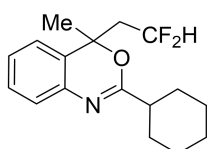

**2-Cyclohexyl-4-(2,2-difluoroethyl)-4-methyl-4H-benzo[d][1,3]oxazine (3xa)**

Colorless oil, 62% yield,  $^1\text{H}$  NMR (500 MHz,  $\text{CDCl}_3$ )  $\delta$  7.31 – 7.24 (m, 1H), 7.20 – 7.14 (m, 2H), 7.03 (d,  $J = 7.6$  Hz, 1H), 5.90 (tdd,  $J = 55.9, 5.3, 3.9$  Hz, 1H), 2.58 – 2.35 (m, 2H), 2.30 (tt,  $J = 11.8, 3.5$  Hz, 1H), 1.98 – 1.90 (m, 2H), 1.81 (dq,  $J = 11.6, 4.5, 4.1$  Hz, 2H), 1.73 – 1.68 (m, 1H), 1.65 (s, 3H), 1.55 – 1.44 (m, 2H), 1.35 – 1.22 (m, 3H).  $^{13}\text{C}$  NMR (126 MHz,  $\text{CDCl}_3$ )  $\delta$  164.9, 138.1, 129.2, 128.0, 126.7, 125.1, 122.7, 76.8 (dd,  $J = 7.2, 5.0$  Hz), 44.0, 29.6, 27.8, 25.9, 25.9, 25.9.  $^{19}\text{F}$  NMR (471 MHz,  $\text{CDCl}_3$ )  $\delta$  -111.8 – -113.4 (m, 2F). HRMS: calcd for  $\text{C}_{17}\text{H}_{22}\text{F}_2\text{NO}^+$   $[\text{M}+\text{H}]^+$ , 294.1664, found 294.1660.

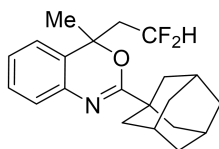

**2-(Adamantan-1-yl)-4-(2,2-difluoroethyl)-4-methyl-4H-benzo[d][1,3]oxazine (3ya)**

Colorless oil, 81% yield,  $^1\text{H}$  NMR (500 MHz,  $\text{CDCl}_3$ )  $\delta$  7.26 (t,  $J = 7.6$  Hz, 1H), 7.16 (dd,  $J = 19.4, 7.5$  Hz, 2H), 7.01 (d,  $J = 7.6$  Hz, 1H), 5.91 (tt,  $J = 56.0, 4.6$  Hz, 1H), 2.56 – 2.38 (m, 2H), 2.06 (s, 3H), 1.94 (d,  $J = 3.0$  Hz, 6H), 1.79 – 1.71 (m, 6H), 1.62 (s, 3H).  $^{13}\text{C}$  NMR (126 MHz,  $\text{CDCl}_3$ )  $\delta$  166.5, 138.5, 129.1, 128.3, 126.6, 125.4, 122.5, 115.2 (t,  $J = 239.0$  Hz), 76.5 (dd,  $J = 7.2, 5.2$  Hz), 44.9 (t,  $J = 21.3$  Hz), 39.2, 39.1, 36.8, 28.3, 27.7.  $^{19}\text{F}$  NMR (471 MHz,  $\text{CDCl}_3$ )  $\delta$  -112.0 – -112.8 (m, 2F). HRMS: calcd for  $\text{C}_{21}\text{H}_{26}\text{F}_2\text{NO}^+$   $[\text{M}+\text{H}]^+$ , 346.1977, found 346.1969.

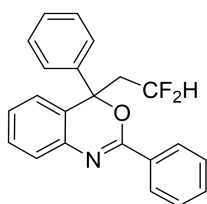

**4-(2,2-Difluoroethyl)-2,4-diphenyl-4H-benzo[d][1,3]oxazine (3za)**

Colorless oil, 87% yield,  $^1\text{H}$  NMR (500 MHz,  $\text{CDCl}_3$ )  $\delta$  8.28 – 8.20 (m, 2H), 7.51 (t,  $J = 7.2$  Hz, 1H), 7.46 (dd,  $J = 8.3, 6.4$  Hz, 2H), 7.39 – 7.35 (m, 2H), 7.34 – 7.31 (m, 2H), 7.30 – 7.21 (m, 5H), 6.05 (tt,  $J = 55.6, 4.3$  Hz, 1H), 3.01 (td,  $J = 15.1, 4.3$  Hz, 2H).  $^{13}\text{C}$  NMR (126 MHz,  $\text{CDCl}_3$ )  $\delta$  156.0, 142.1, 139.2, 132.2, 131.8, 129.6, 128.7, 128.5, 128.5, 128.0, 126.8, 126.6, 125.9, 125.6, 124.5, 115.4 (t,  $J = 240.0$  Hz), 81.0 (t,  $J = 6.5$  Hz), 44.9 (t,  $J = 22.4$  Hz).  $^{19}\text{F}$  NMR (471 MHz, Chloroform-*d*)  $\delta$  -110.2 – -112.3 (m, 2F). HRMS: calcd for  $\text{C}_{22}\text{H}_{18}\text{F}_2\text{NO}^+ [\text{M}+\text{H}]^+$ , 350.1351, found 350.1344.

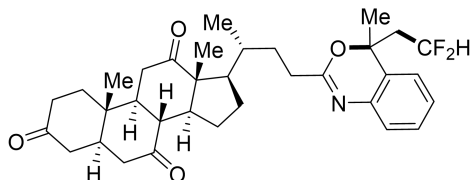

**(5R,8R,9S,10S,13R,14S,17R)-17-((R)-4-((S)-4-(2,2-Difluoroethyl)-4-methyl-4H-benzo[d][1,3]oxazin-2-yl)butan-2-yl)-10,13-dimethyldodecahydro-3H-cyclopenta[a]phenanthrene-3,7,12(2H,4H)-trione (3Aa)**

Colorless oil, 64% yield, dr = 1:1,  $^1\text{H}$  NMR (500 MHz,  $\text{CDCl}_3$ )  $\delta$  7.29 – 7.25 (m, 1H), 7.20 – 7.13 (m, 2H), 7.03 (d,  $J = 7.6$  Hz, 1H), 6.01 – 5.75 (m, 1H), 2.95 – 2.82 (m, 3H), 2.56 – 2.39 (m, 3H), 2.34 (ddt,  $J = 18.1, 9.0, 4.9$  Hz, 4H), 2.28 – 2.20 (m, 3H), 2.18 – 2.12 (m, 2H), 2.11 – 2.02 (m, 3H), 2.00 – 1.94 (m, 1H), 1.86 (tt,  $J = 11.6, 4.9$  Hz, 2H), 1.67 (d,  $J = 2.9$  Hz, 4H), 1.62 (td,  $J = 14.4, 4.7$  Hz, 1H), 1.48 (q,  $J = 10.9, 7.8$  Hz, 1H), 1.40 (s, 3H), 1.36 (tt,  $J = 5.8, 2.2$  Hz, 2H), 1.08 (s, 3H), 0.91 (d,  $J = 6.6$  Hz, 3H).  $^{13}\text{C}$  NMR (126 MHz,  $\text{CDCl}_3$ )  $\delta$  212.0, 209.1, 208.8, 162.5, 162.4 (C'), 138.0, 129.2, 127.8, 127.8 (C'), 126.8, 125.0, 122.7, 115.6 (d,  $J = 239.6$  Hz), 115.6 (d,  $J = 239.6$  Hz, C') 57.1, 51.9, 49.2, 47.0, 45.9, 45.9 (C'), 45.7, 45.5 (t,  $J = 21.5$  Hz), 45.1, 42.9, 38.8, 36.6, 36.2, 36.0, 36.0 (C'), 35.4, 32.7, 31.7, 31.7 (C'), 28.1, 28.0 (C'), 27.8, 27.8 (C'), 25.3, 22.0, 18.9, 18.9 (C'), 12.0.  $^{19}\text{F}$  NMR (471 MHz,  $\text{CDCl}_3$ )  $\delta$  -111.9 – -113.6 (m, 2F). HRMS: calcd for  $\text{C}_{34}\text{H}_{44}\text{F}_2\text{NO}_4^+ [\text{M}+\text{H}]^+$ , 568.3233, found 568.3241.

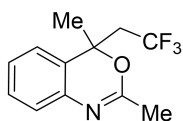

**2,4-Dimethyl-4-(2,2,2-trifluoroethyl)-4H-benzo[d][1,3]oxazine (3tb)**

Colorless oil, 79% yield,  $^1\text{H}$  NMR (500 MHz,  $\text{CDCl}_3$ )  $\delta$  7.32 – 7.26 (m, 1H), 7.21 – 7.11 (m, 2H), 7.06 (dd,  $J = 7.6, 1.4$  Hz, 1H), 2.79 – 2.67 (m, 1H), 2.54 – 2.43 (m, 1H), 2.13 (s, 3H), 1.82 (s, 3H).  $^{13}\text{C}$  NMR (126 MHz,  $\text{CDCl}_3$ )  $\delta$  159.5, 137.8, 129.4, 127.5, 126.8, 125.1 (q,  $J = 279.1$  Hz), 124.8, 122.8, 76.3 (q,  $J = 2.0$  Hz), 44.3 (q,  $J = 26.9$  Hz), 27.1 (q,  $J = 1.7$  Hz), 21.6.  $^{19}\text{F}$  NMR (471 MHz,  $\text{CDCl}_3$ )  $\delta$  60.4 (t,  $J = 279.1$  Hz, 3F). HRMS: calcd for  $\text{C}_{12}\text{H}_{13}\text{F}_3\text{NO}^+ [\text{M}+\text{H}]^+$ , 244.0944, found 244.0946.

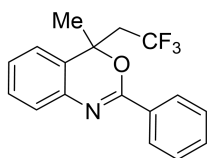

**4-Methyl-2-phenyl-4-(2,2,2-trifluoroethyl)-4H-benzo[d][1,3]oxazine (3ab)**

Colorless oil, 71% yield,  $^1\text{H}$  NMR (500 MHz, Chloroform-*d*)  $\delta$  8.19 – 8.14 (m, 2H), 7.50 (dd,  $J$  = 8.5, 6.0 Hz, 1H), 7.45 (dd,  $J$  = 8.4, 6.6 Hz, 2H), 7.34 (d,  $J$  = 3.6 Hz, 2H), 7.23 (ddd,  $J$  = 10.9, 5.5, 3.0 Hz, 1H), 7.13 (d,  $J$  = 7.6 Hz, 1H), 2.90 – 2.56 (m, 2H), 1.92 (s, 3H).  $^{13}\text{C}$  NMR (126 MHz, Chloroform-*d*)  $\delta$  155.8, 138.4, 132.3, 131.7, 129.5, 128.4, 128.1, 127.1, 125.3 (q,  $J$  = 279.2 Hz), 125.7, 122.7, 76.7 (q,  $J$  = 2.1 Hz), 43.7 (q,  $J$  = 27.1 Hz), 26.4 (q,  $J$  = 1.9 Hz).  $^{19}\text{F}$  NMR (471 MHz, Chloroform-*d*)  $\delta$  -59.9 (s, 3F). HRMS: calcd for  $\text{C}_{17}\text{H}_{15}\text{F}_3\text{NO}^+$   $[\text{M}+\text{H}]^+$ , 306.1100, found 306.1107.

## NMR spectra for compounds

### <sup>1</sup>H NMR Spectrum of **3aa**

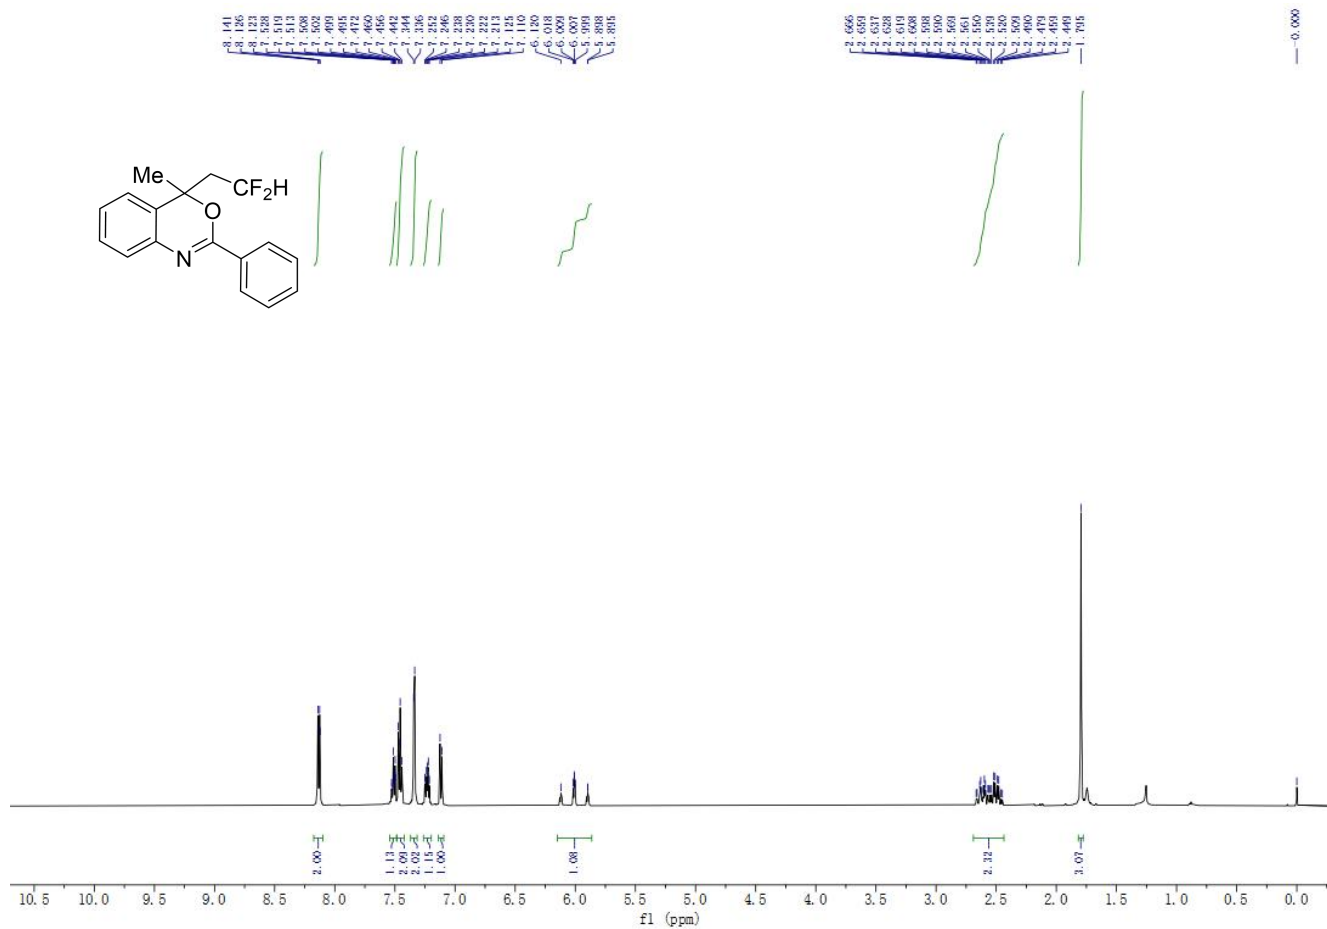

### <sup>13</sup>C NMR Spectrum of **3aa**

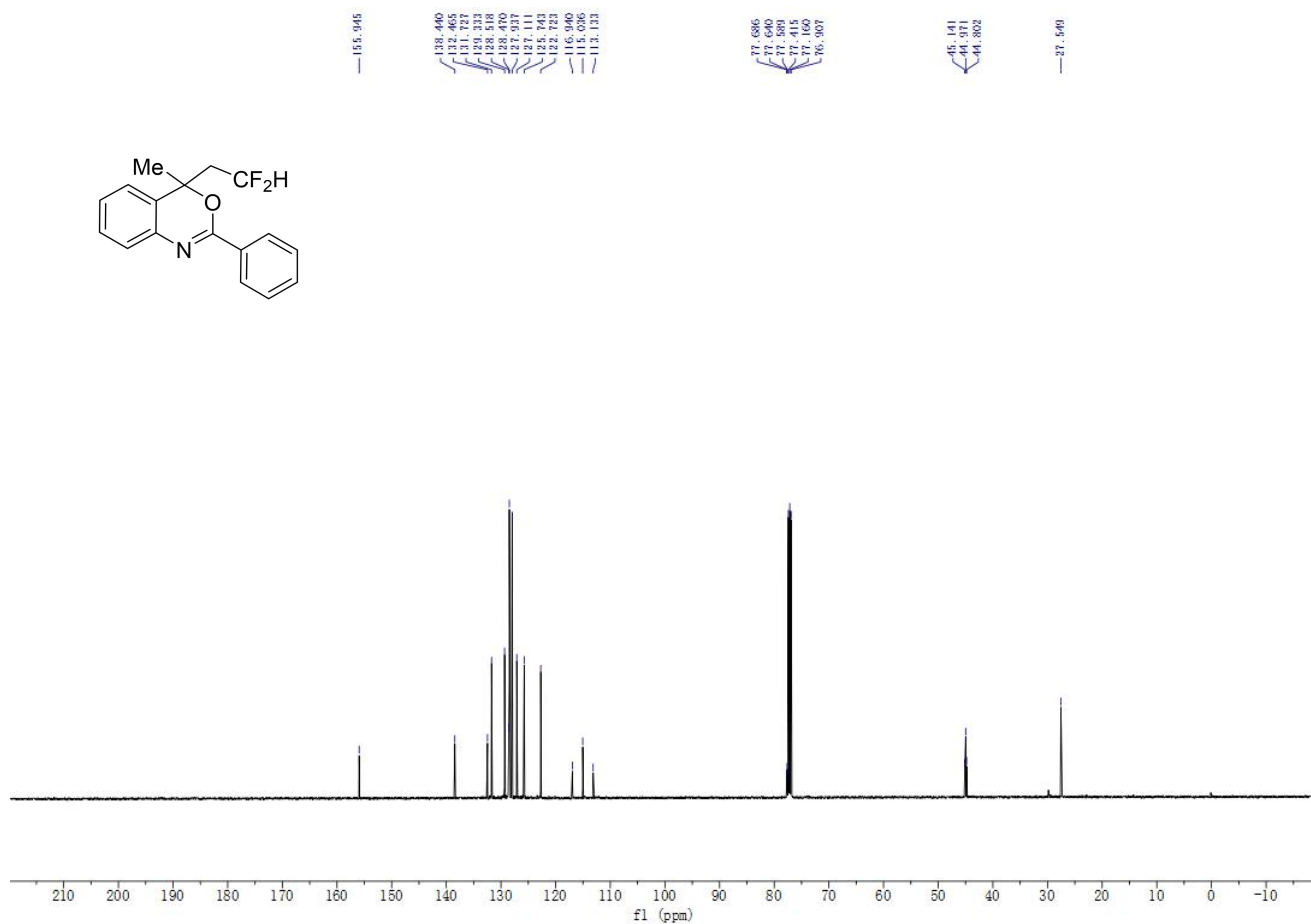



# <sup>19</sup>F NMR Spectrum of 3aa

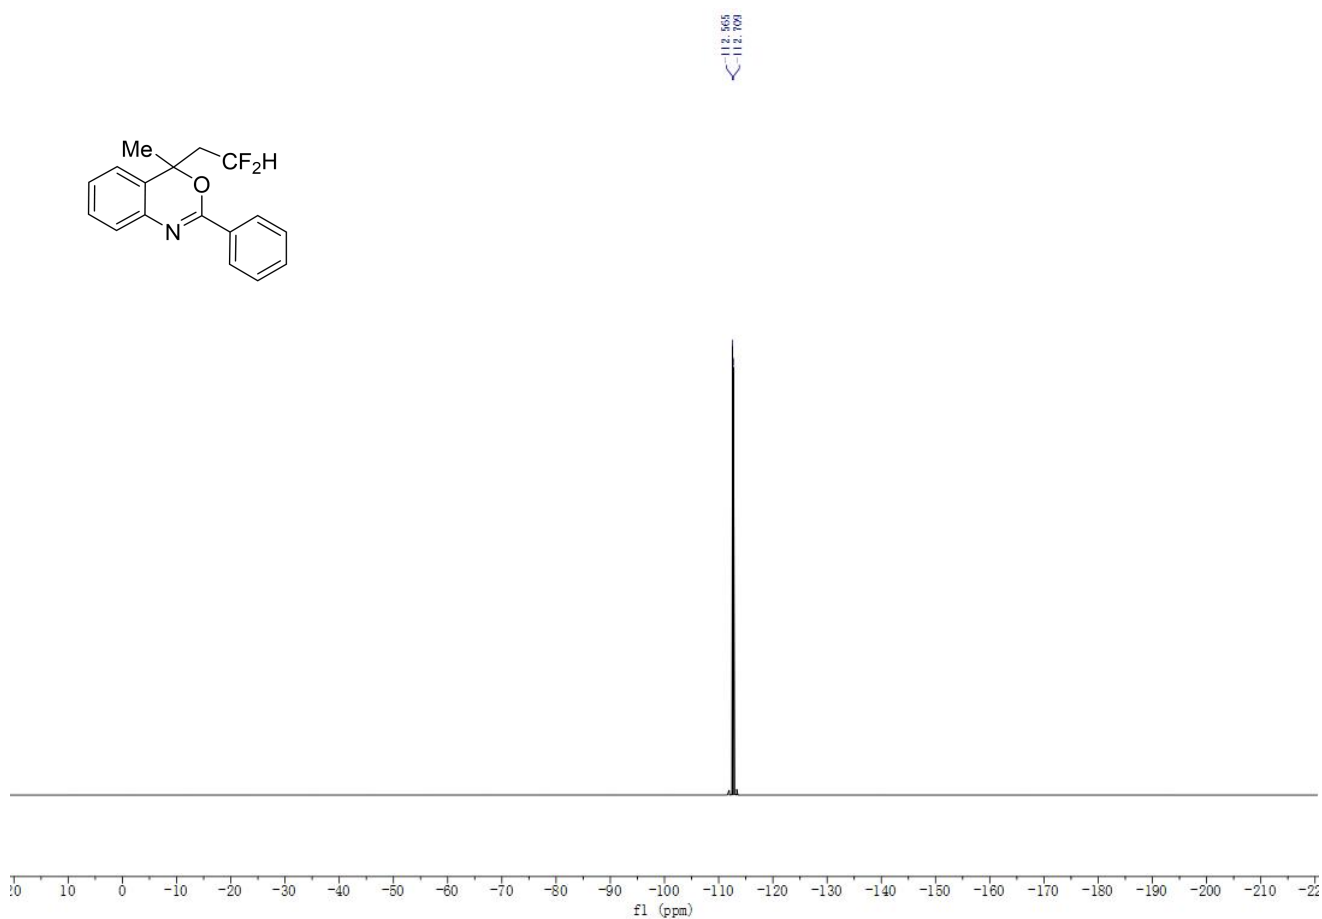

# <sup>1</sup>H NMR Spectrum of 3ba

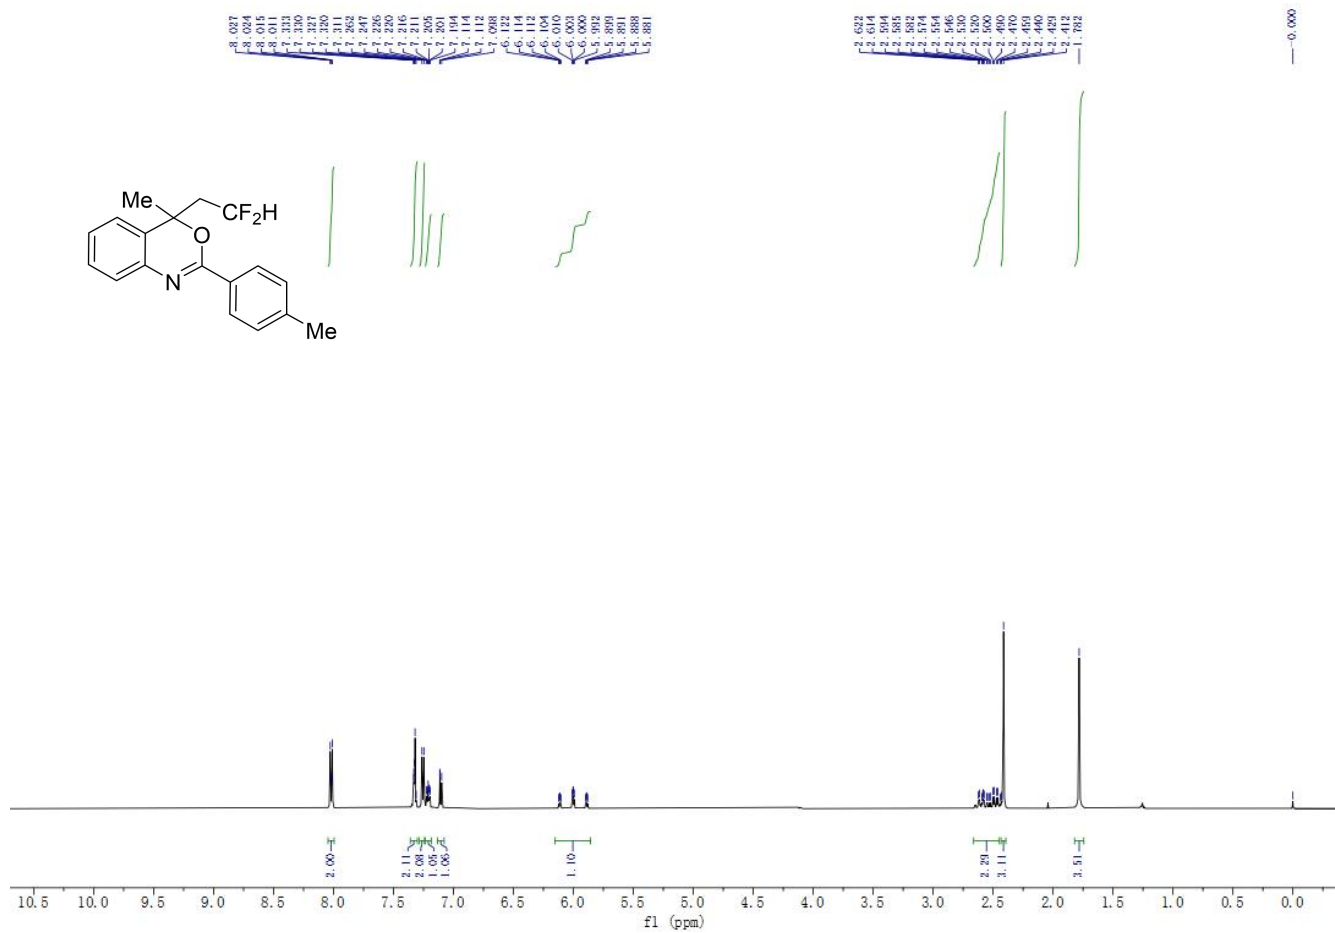

### <sup>13</sup>C NMR Spectrum of **3ba**

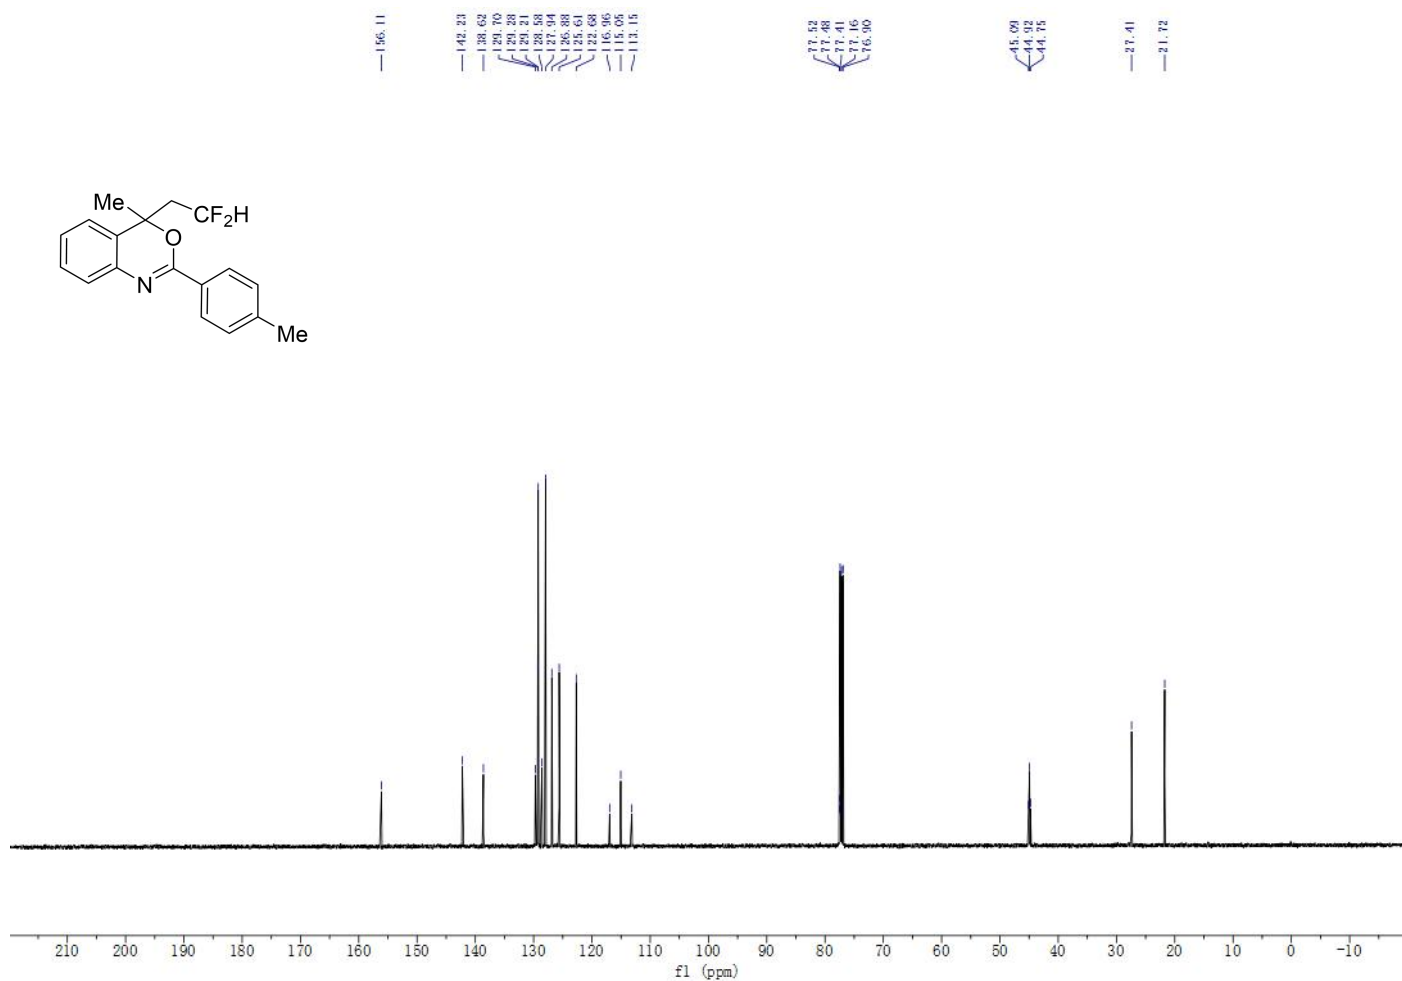

### <sup>19</sup>F NMR Spectrum of **3ba**

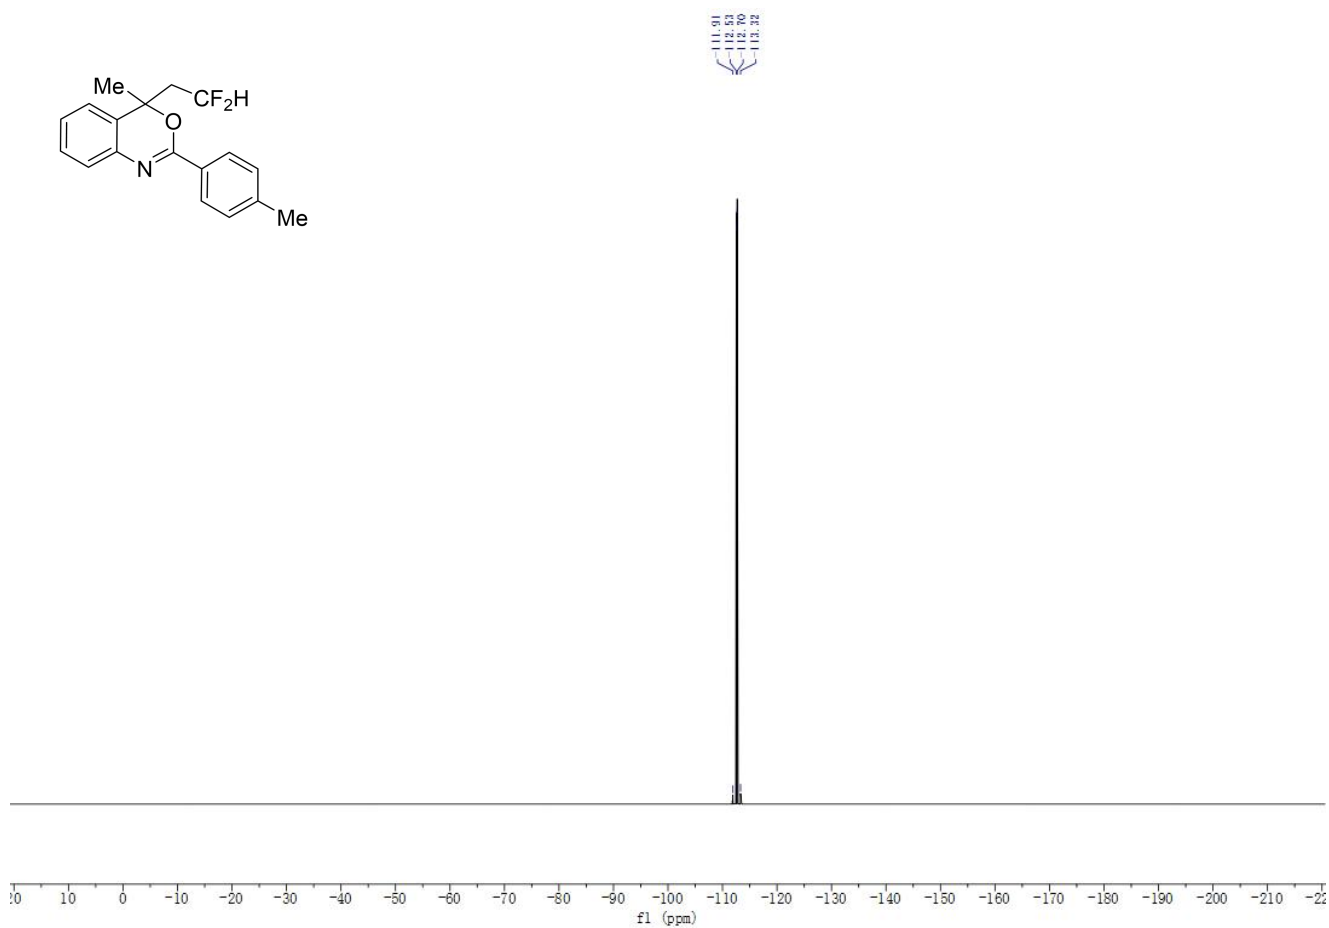

### <sup>1</sup>H NMR Spectrum of 3ca

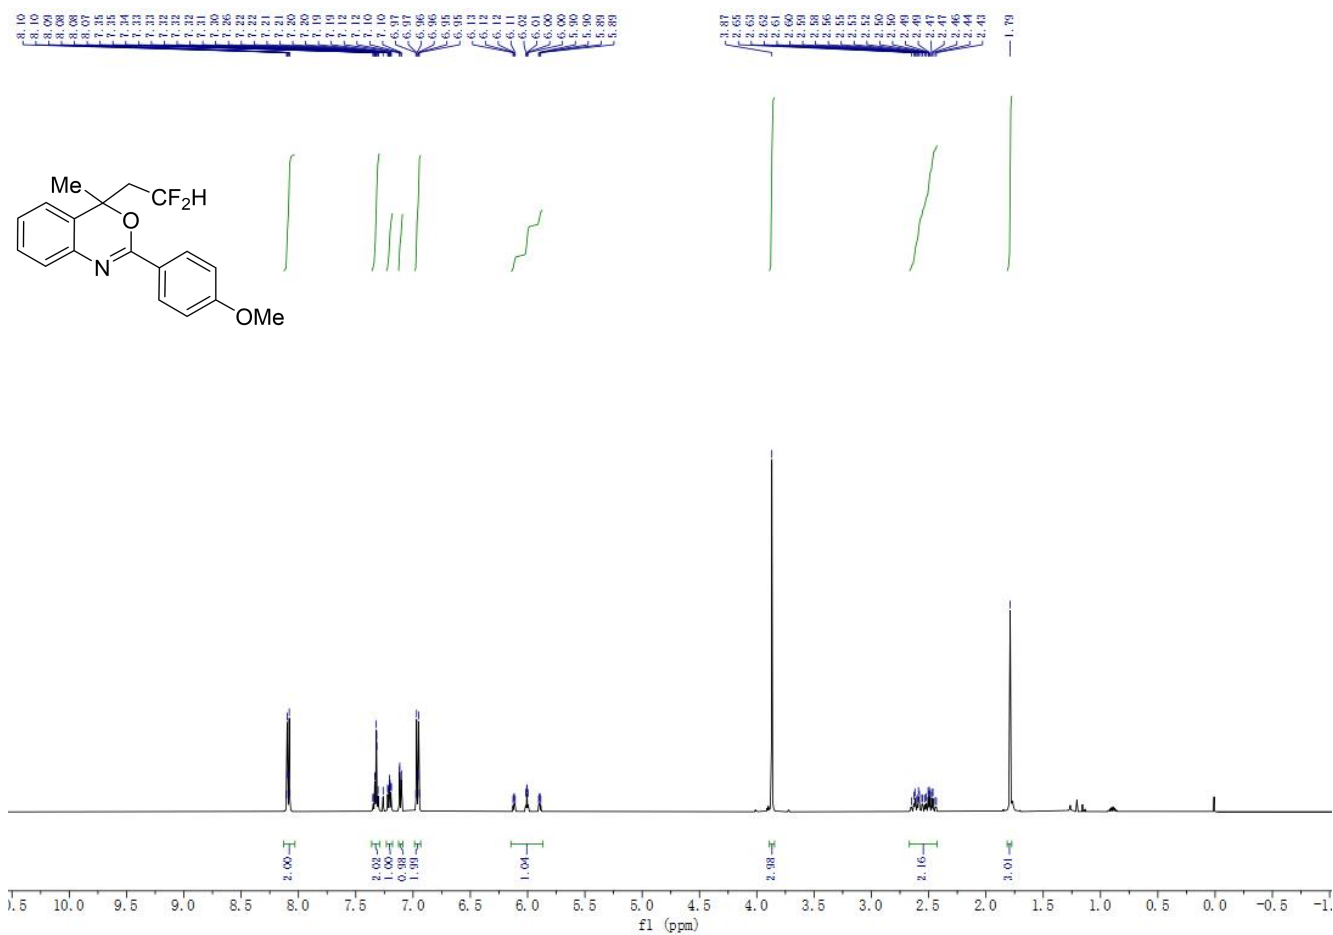

### <sup>13</sup>C NMR Spectrum of 3ca

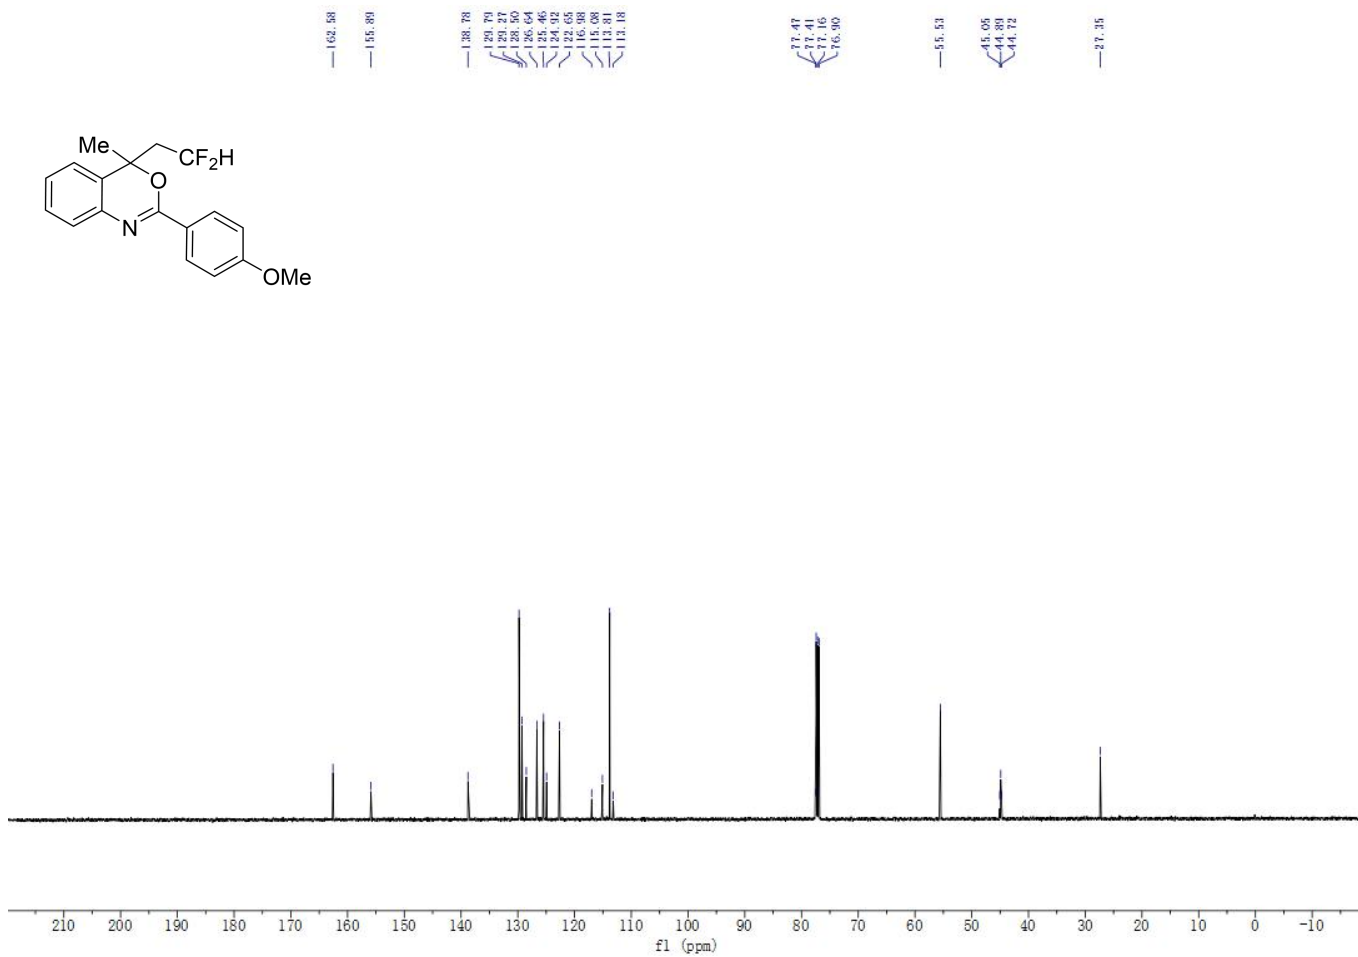

# <sup>19</sup>F NMR Spectrum of 3ca

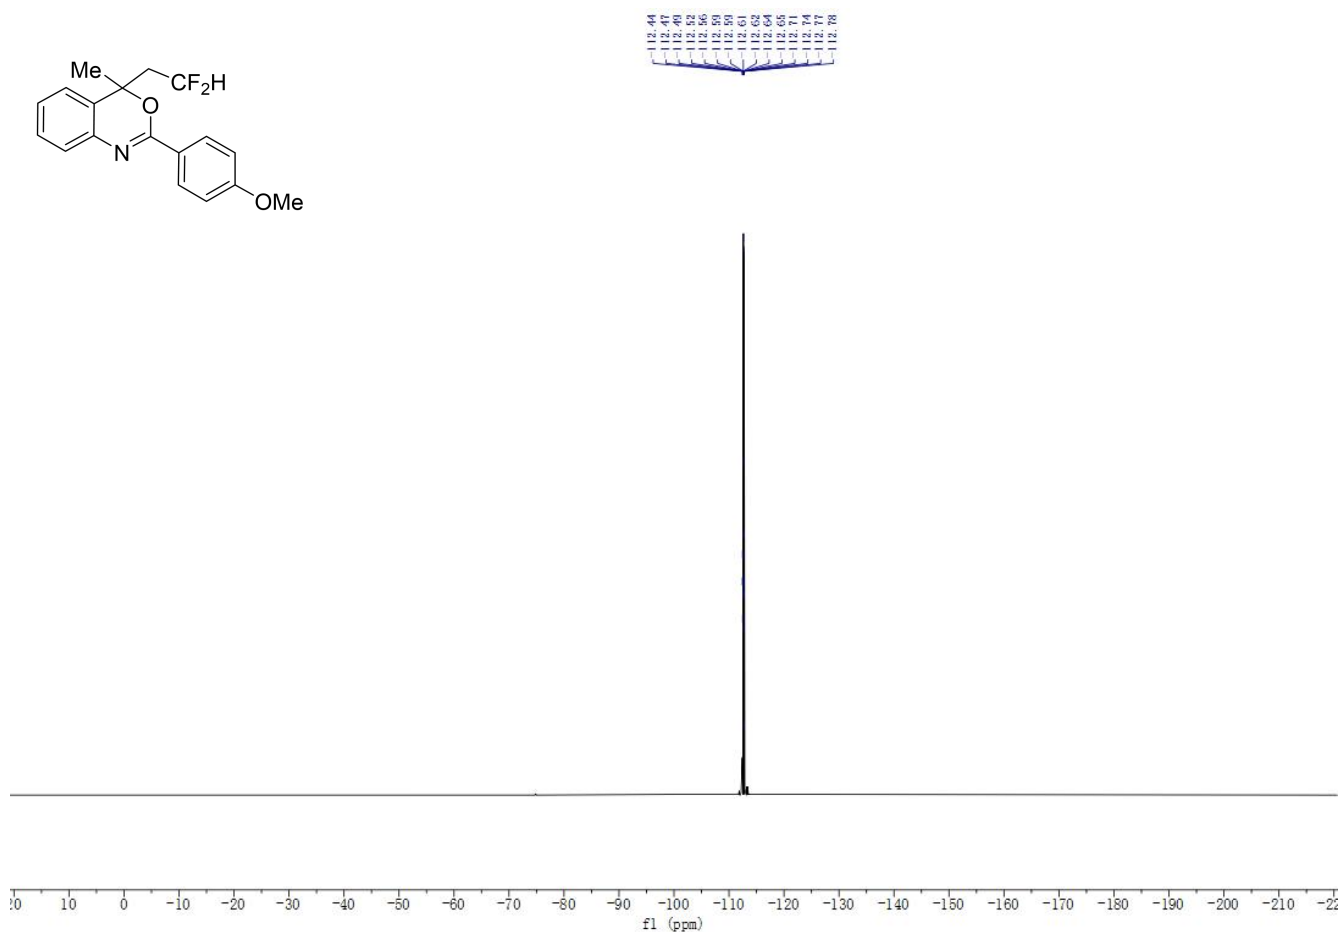

# <sup>1</sup>H NMR Spectrum of 3da

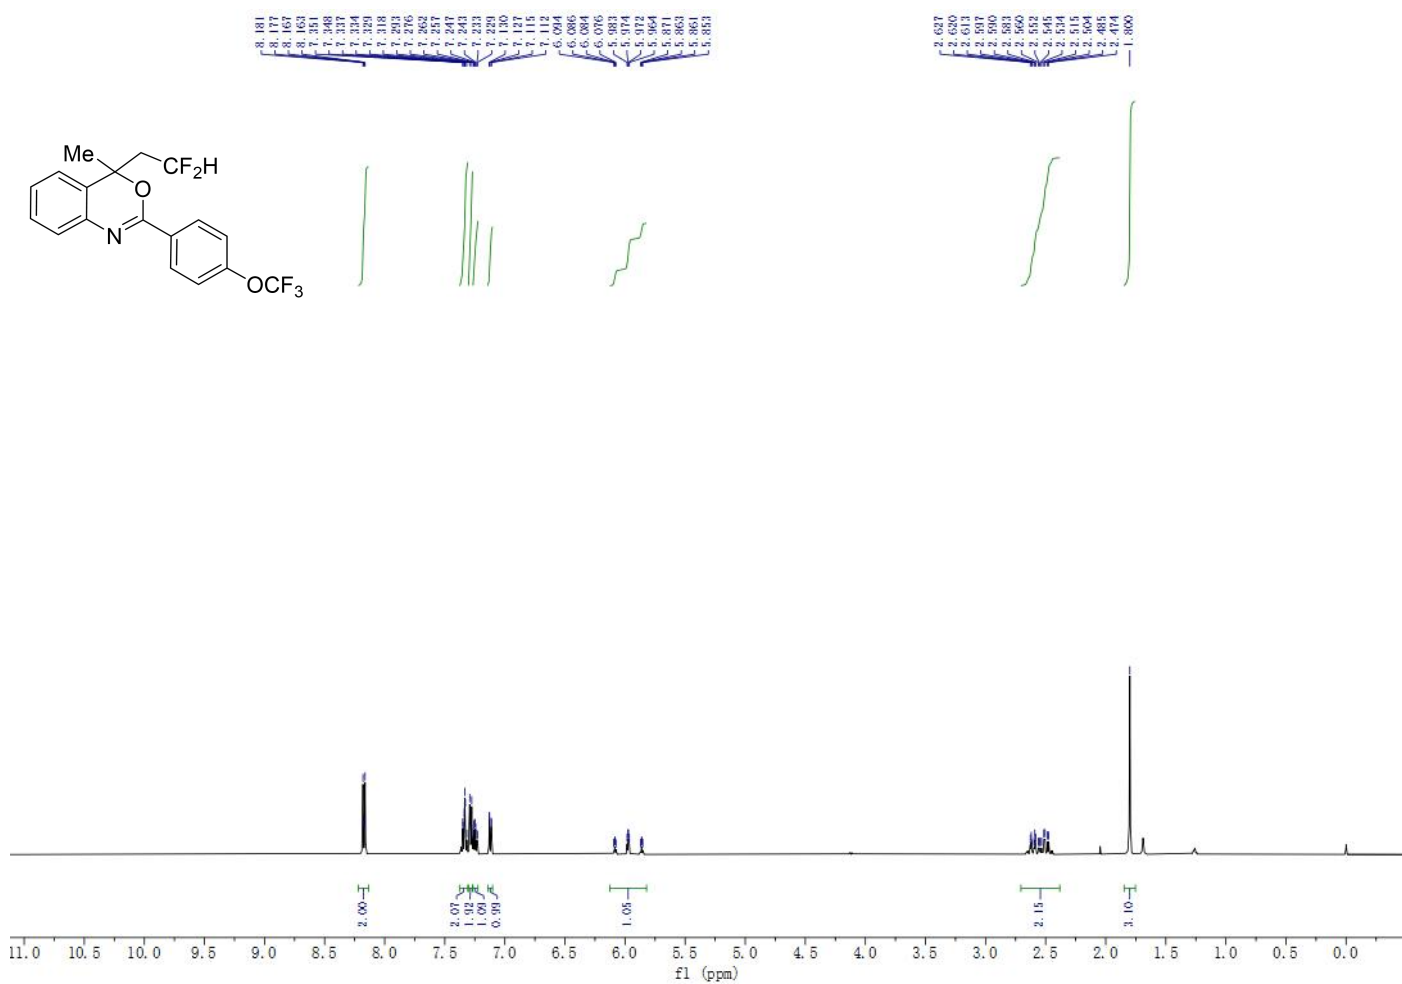

### <sup>13</sup>C NMR Spectrum of **3da**

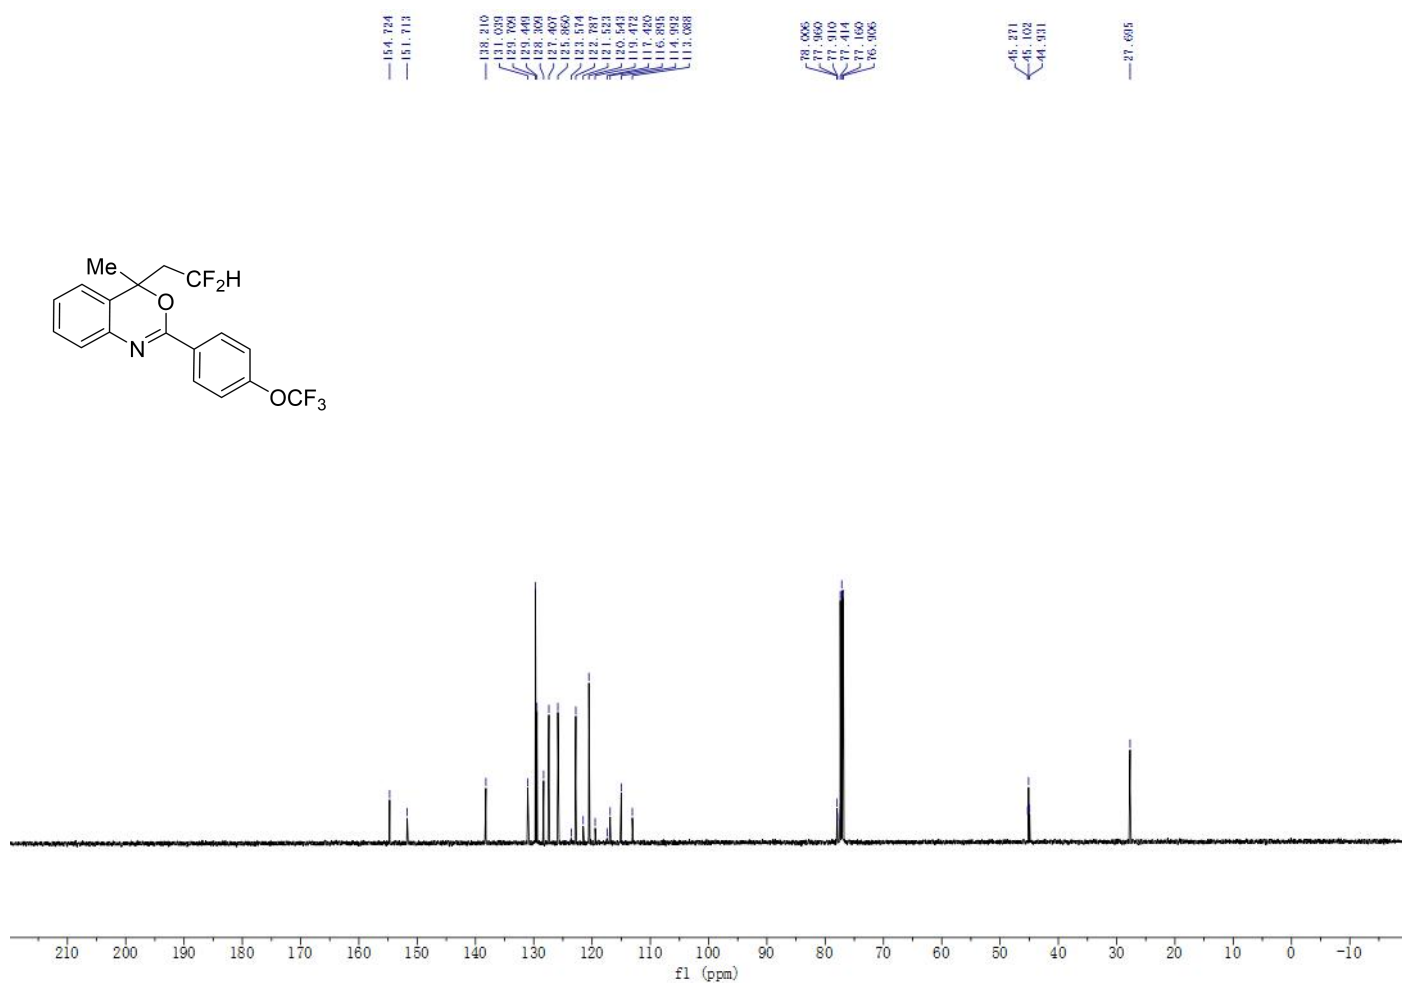

### <sup>19</sup>F NMR Spectrum of **3da**

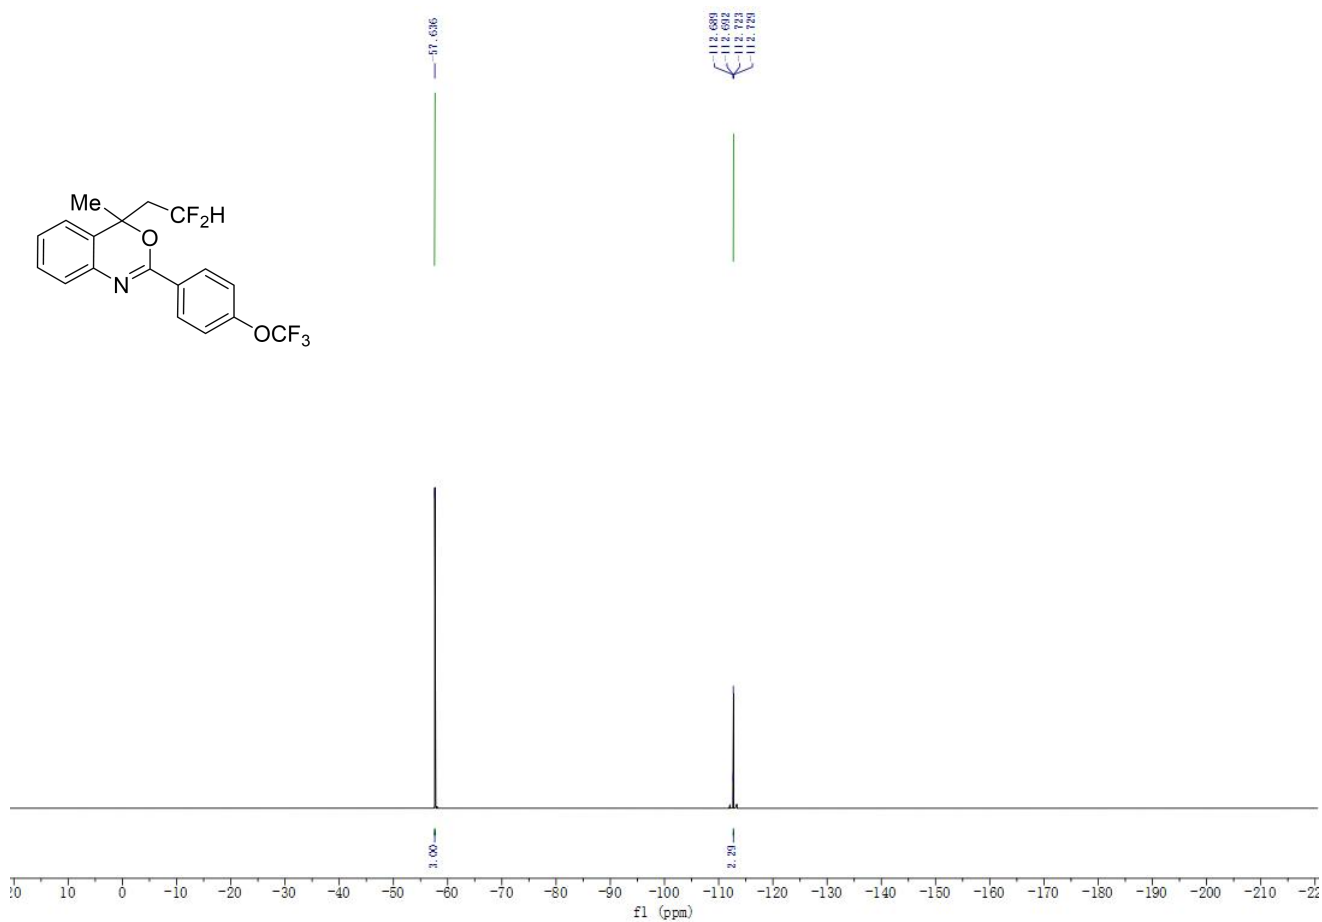

<sup>1</sup>H NMR Spectrum of **3ea**

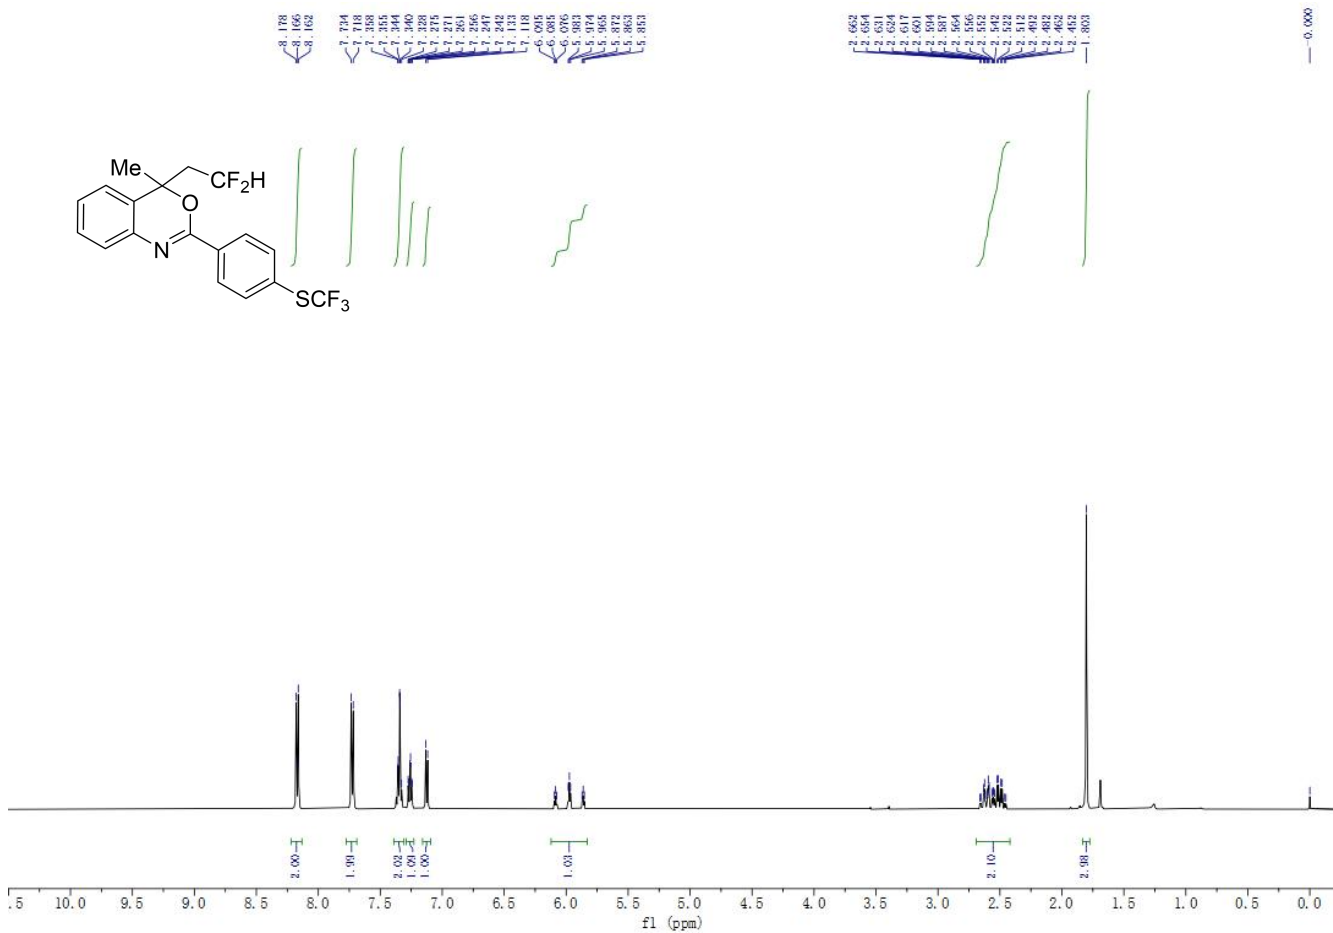

<sup>13</sup>C NMR Spectrum of **3ea**

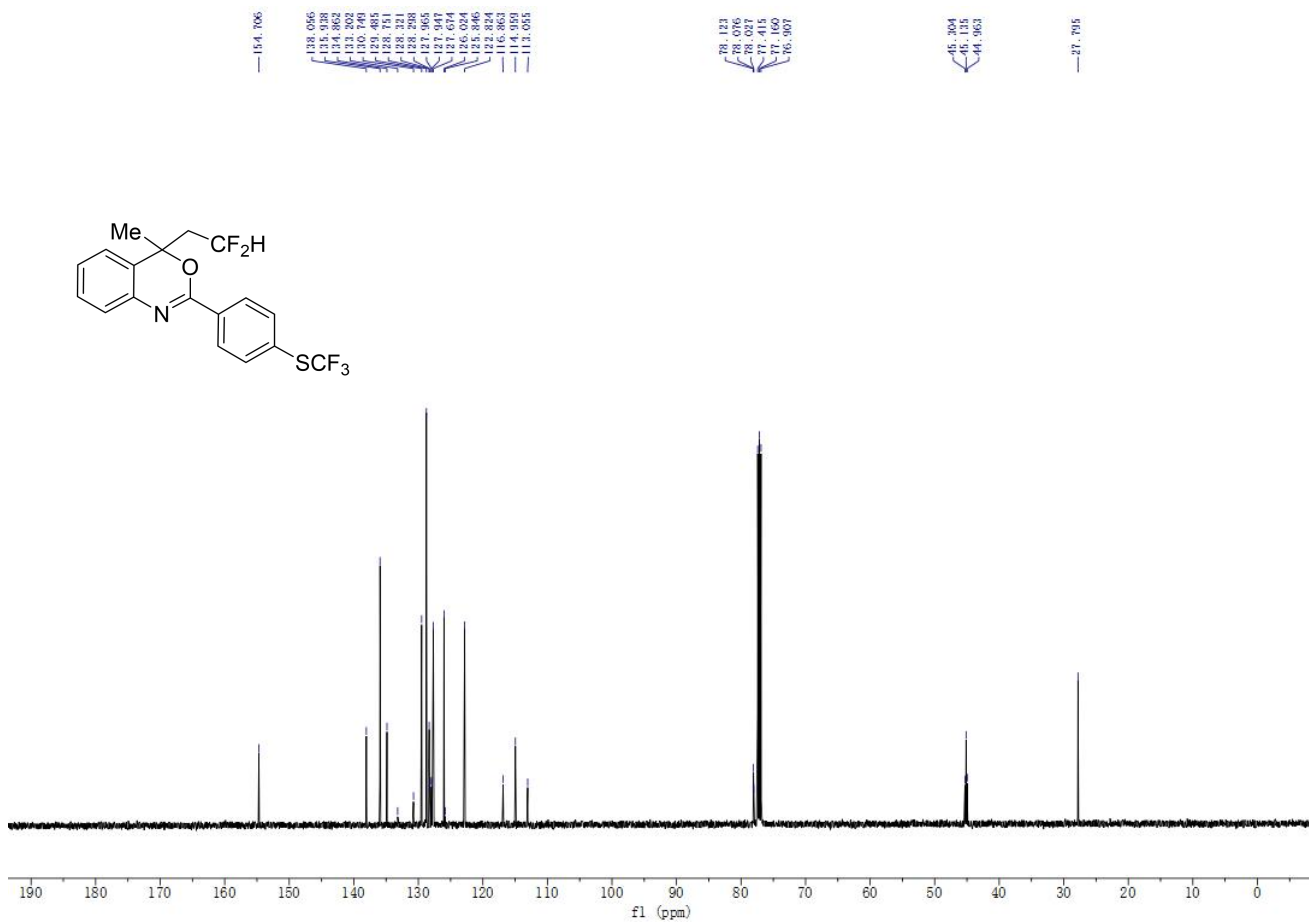

# <sup>19</sup>F NMR Spectrum of 3ea

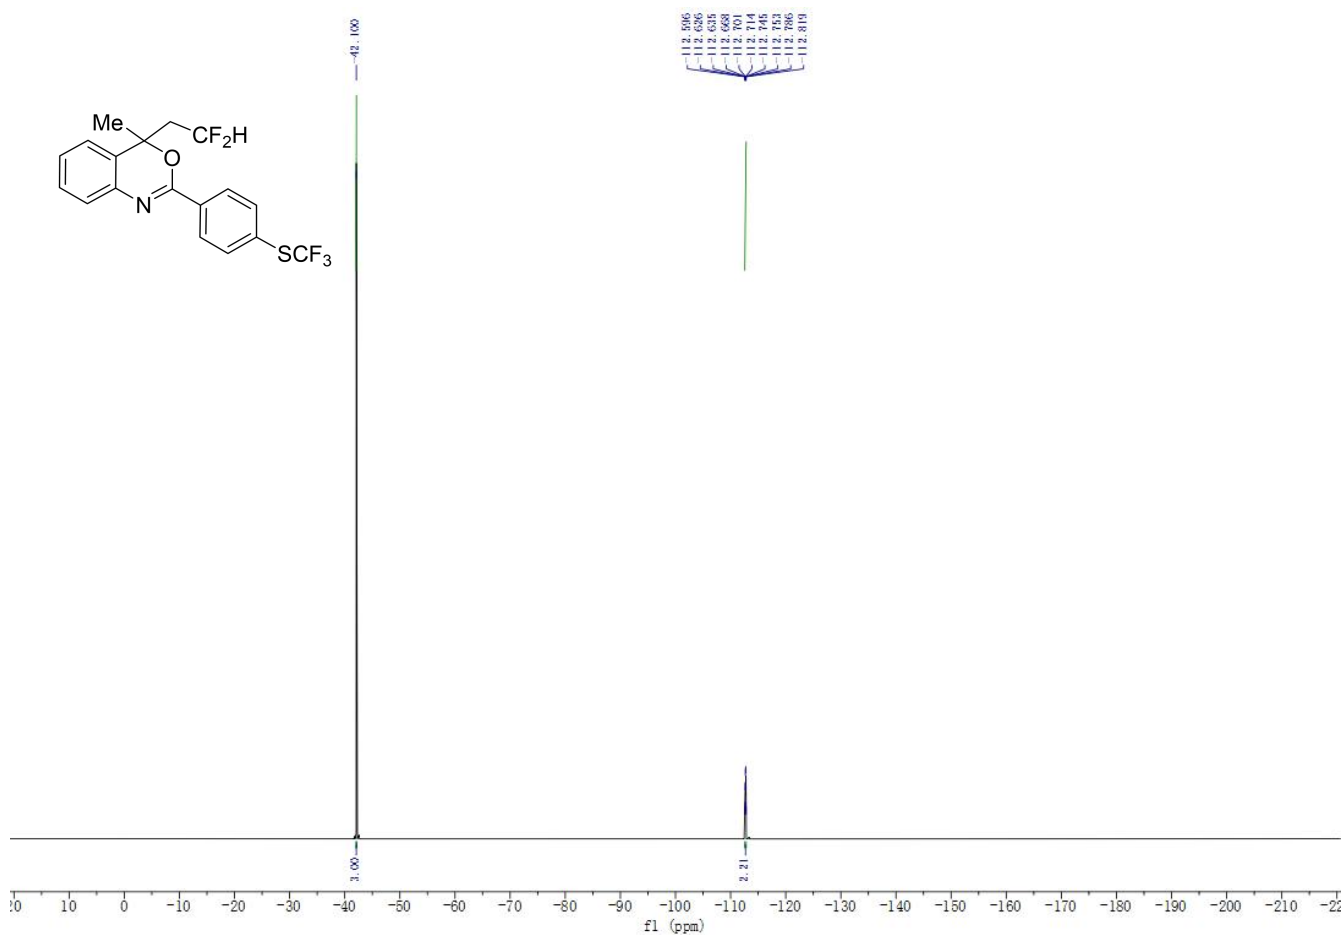

# <sup>1</sup>H NMR Spectrum of 3fa

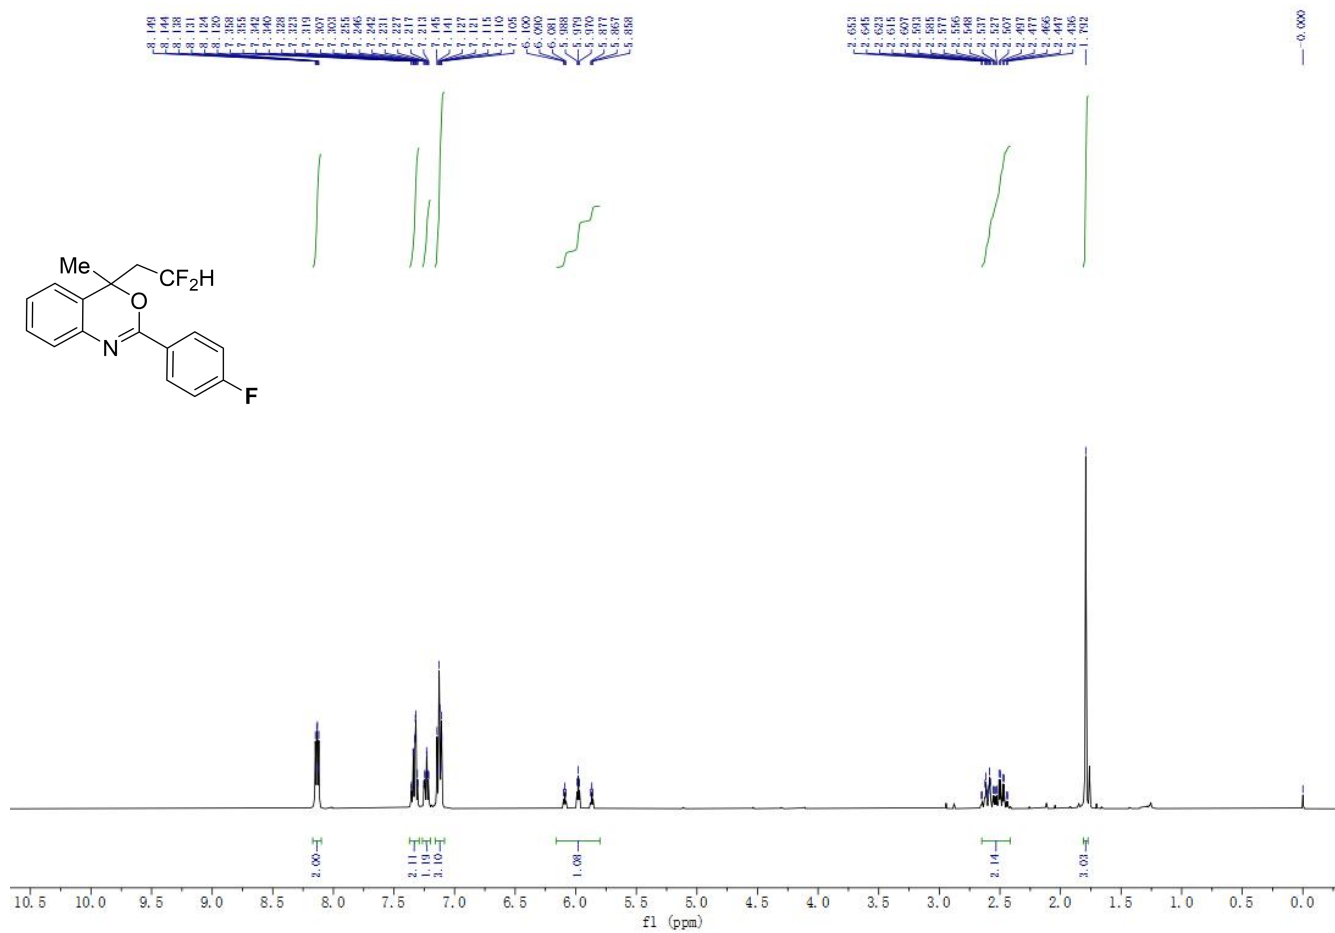

### <sup>13</sup>C NMR Spectrum of 3fa

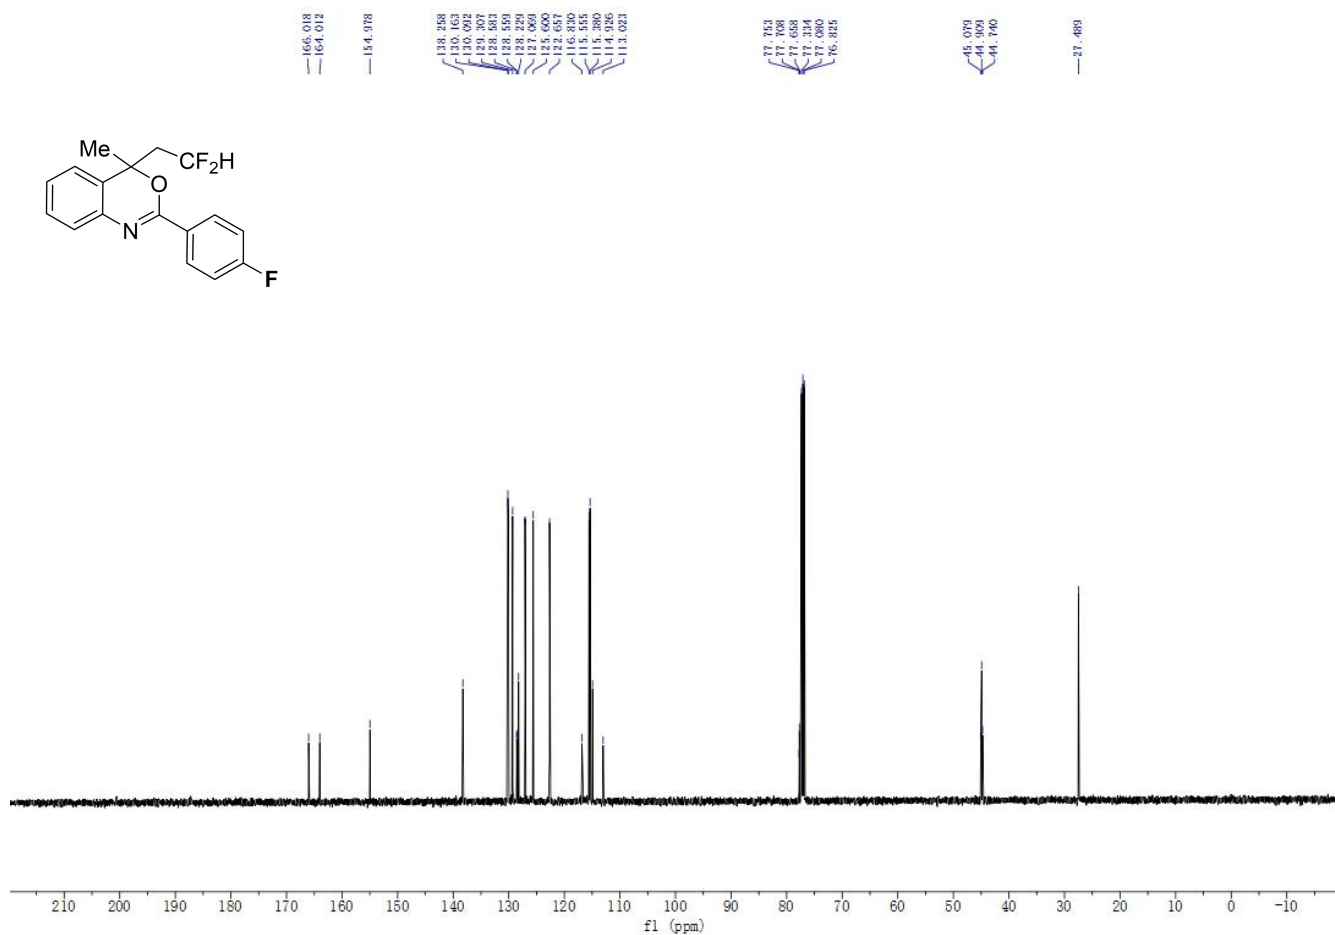

### <sup>19</sup>F NMR Spectrum of 3fa

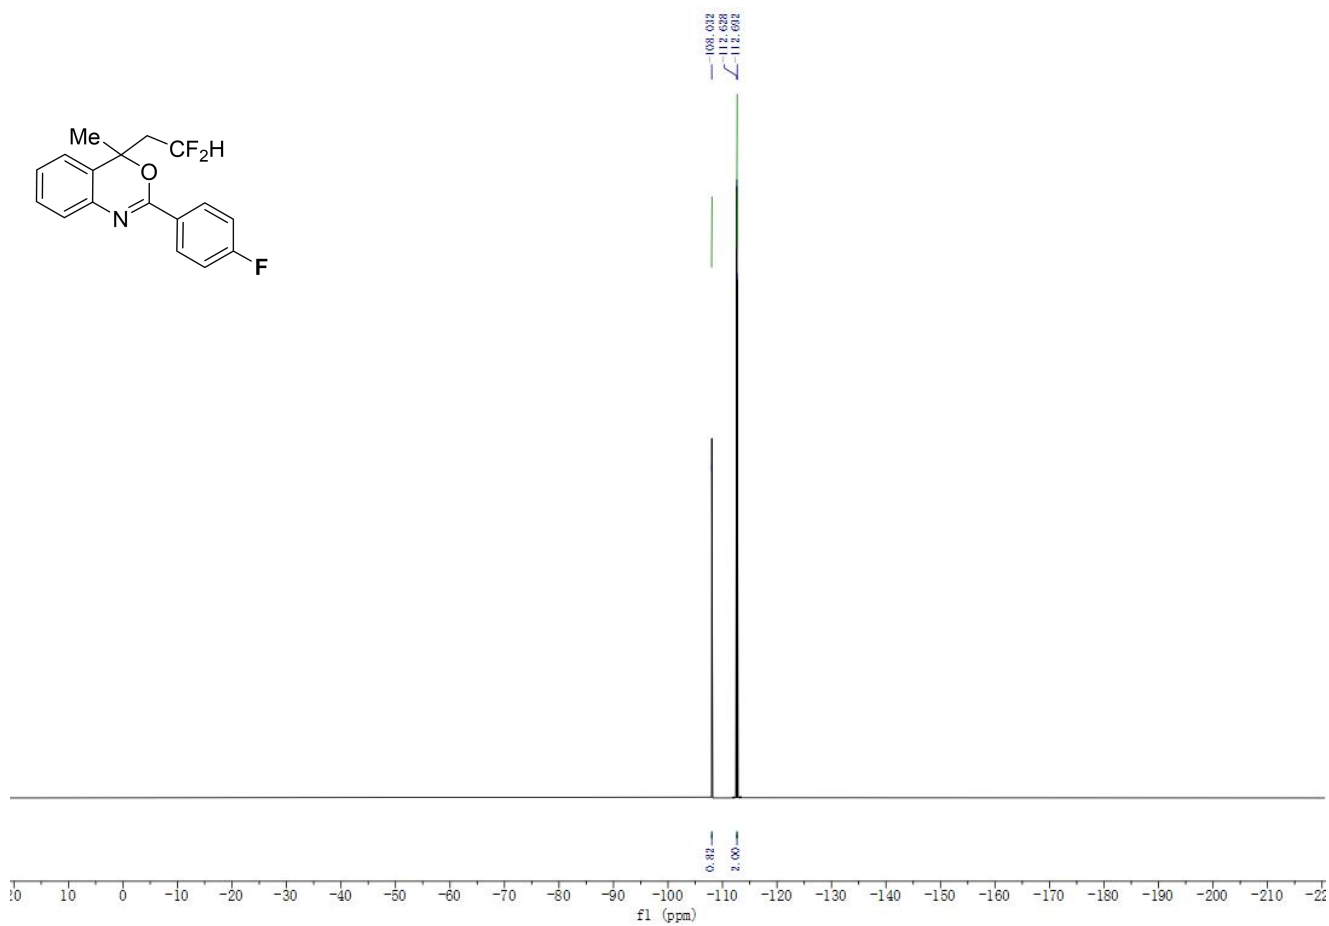



<sup>1</sup>H NMR Spectrum of **3ga**

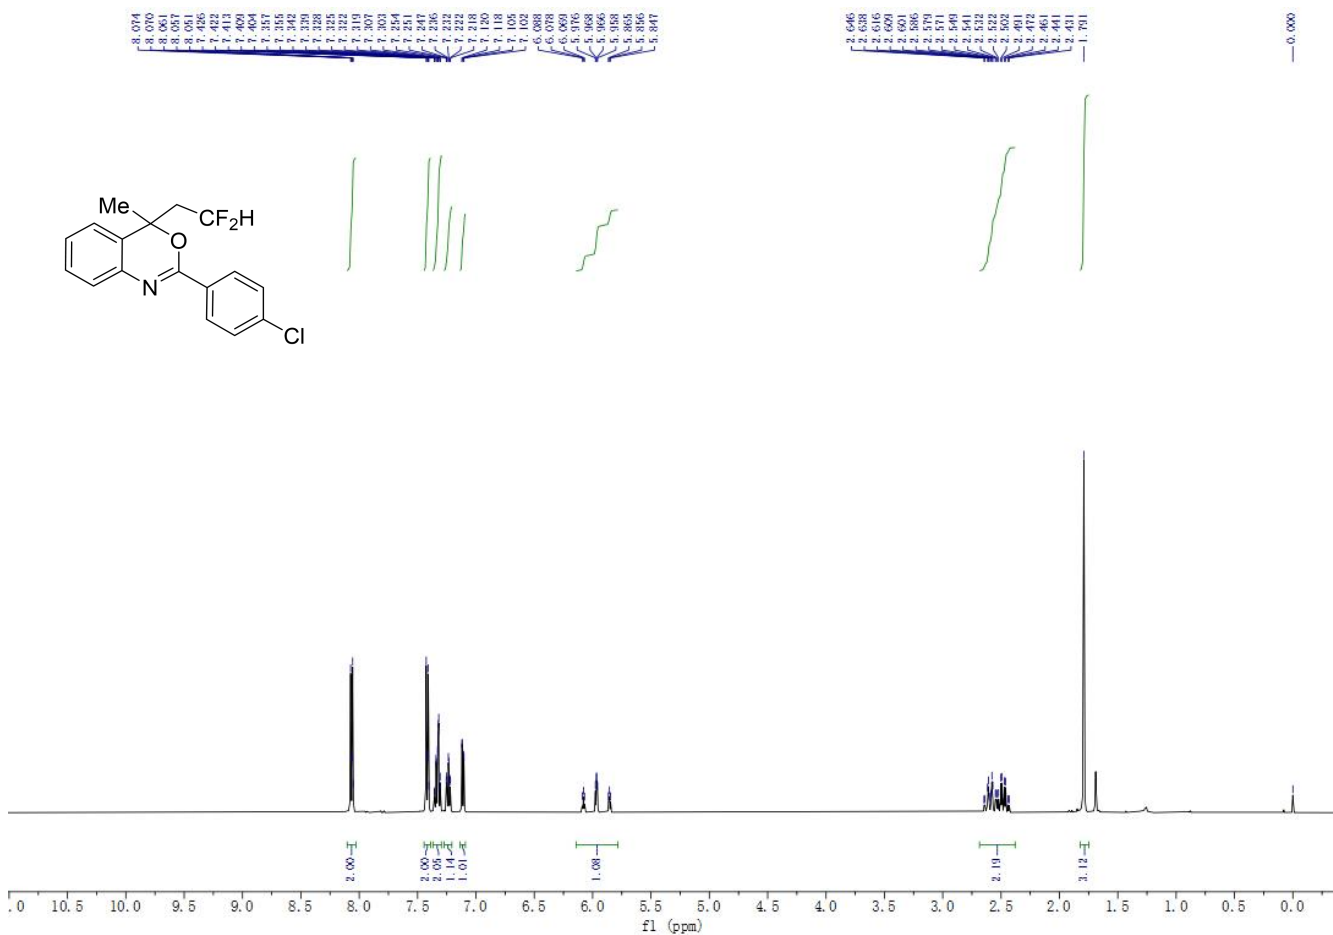

<sup>13</sup>C NMR Spectrum of **3ga**

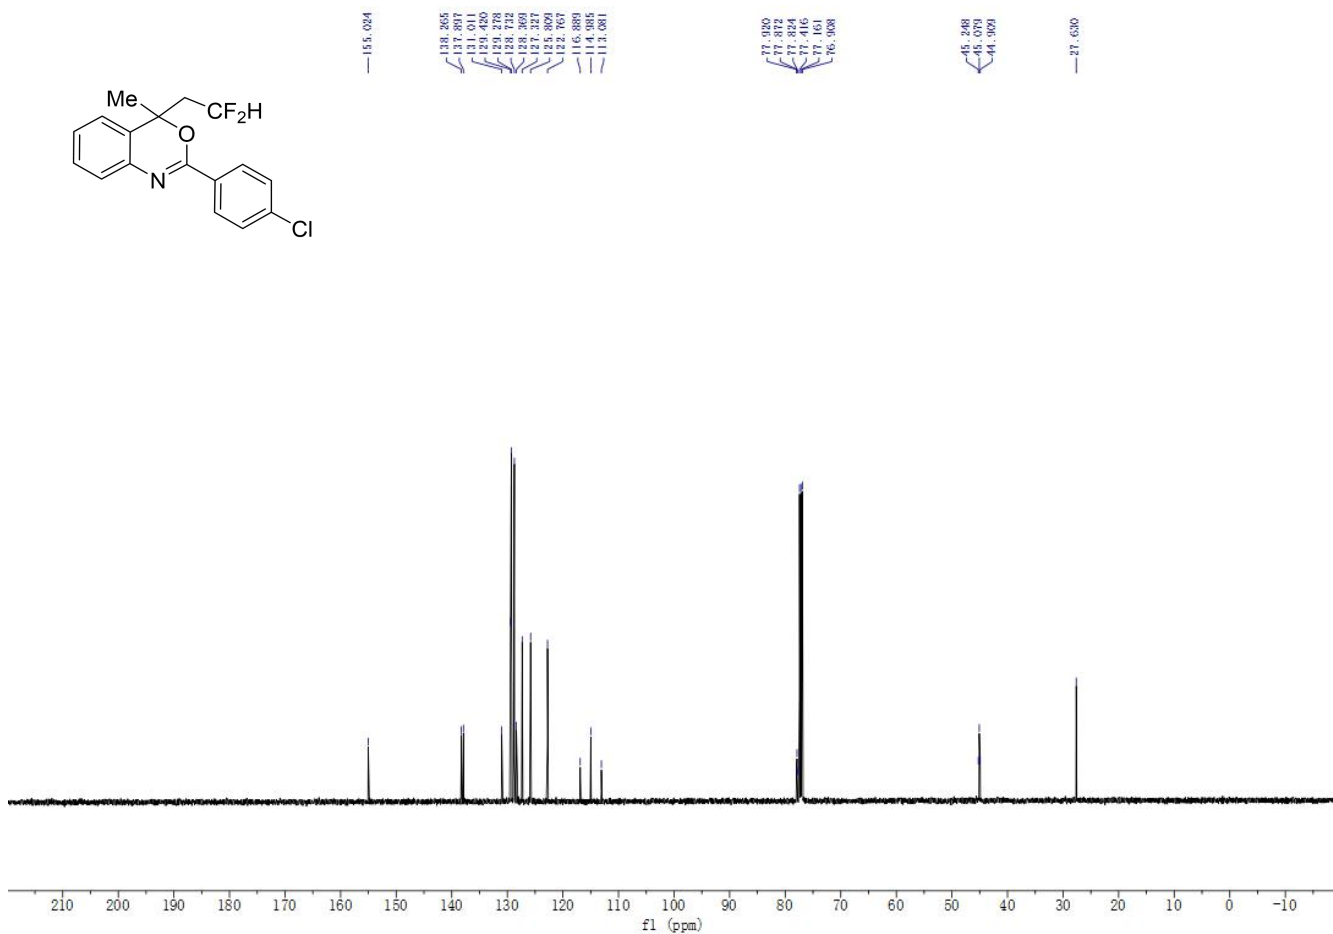

# <sup>19</sup>F NMR Spectrum of 3ga

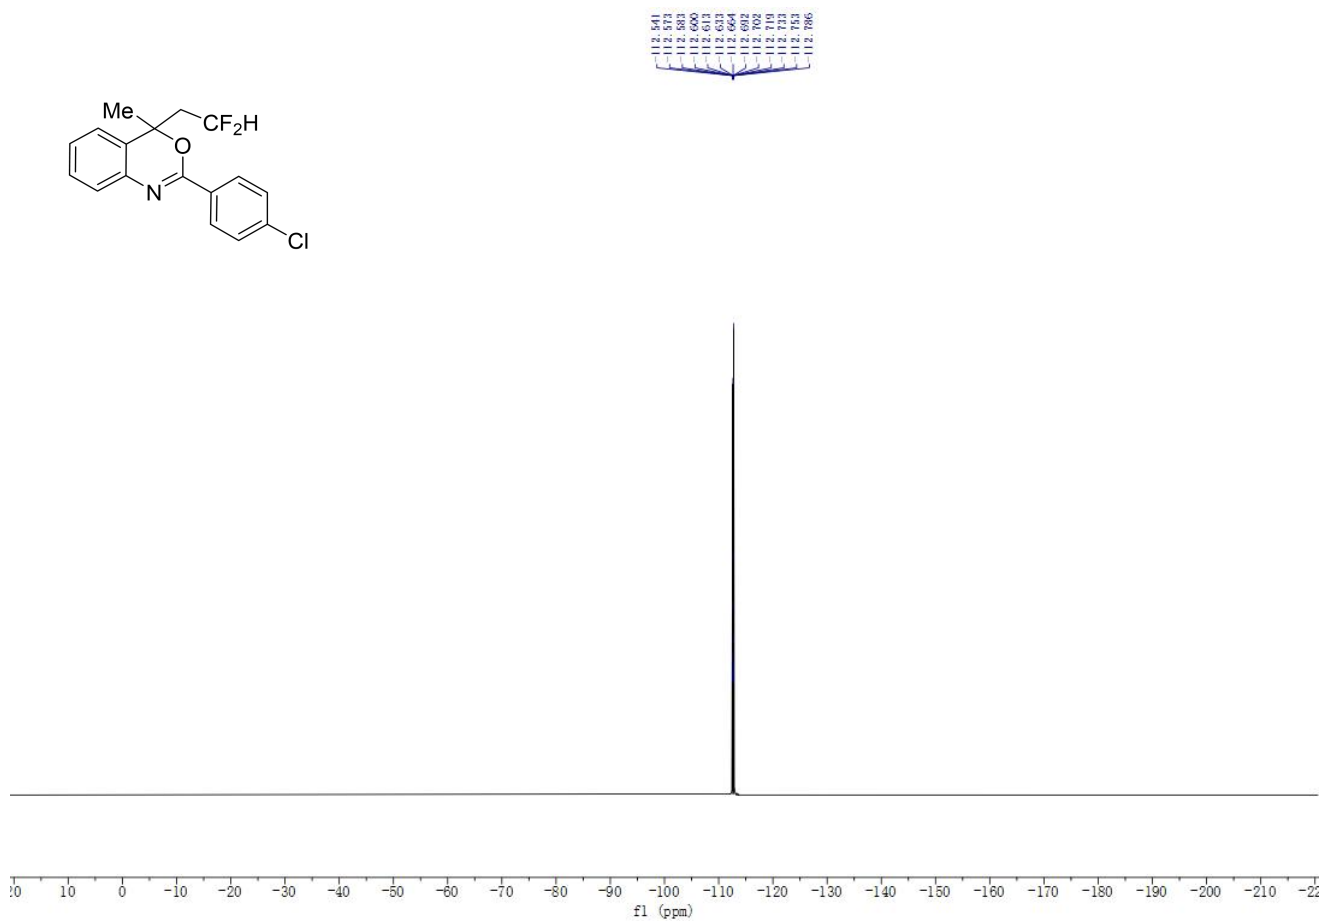

# <sup>1</sup>H NMR Spectrum of 3ha

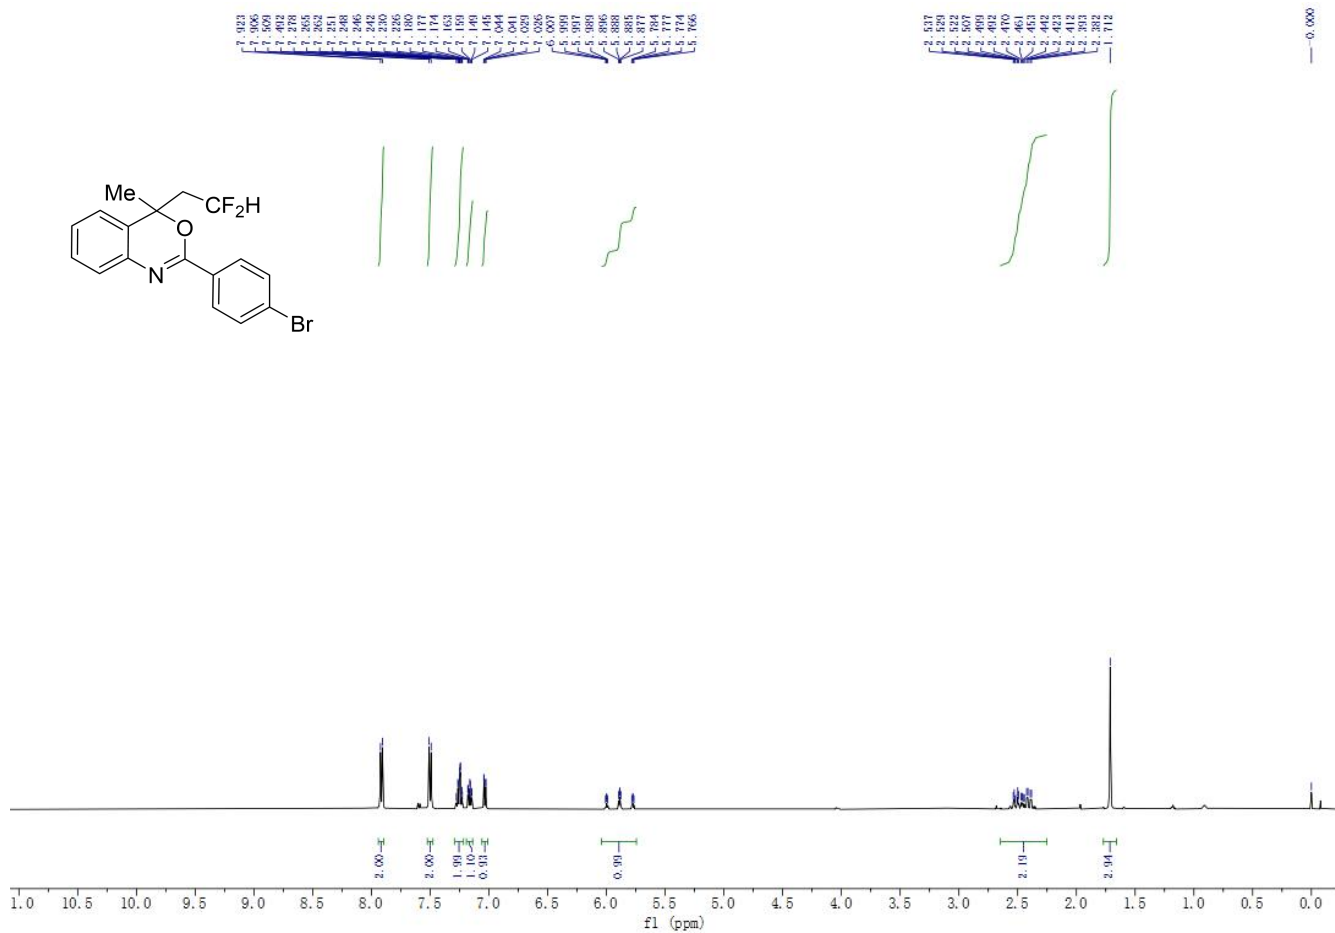

### <sup>13</sup>C NMR Spectrum of **3ha**

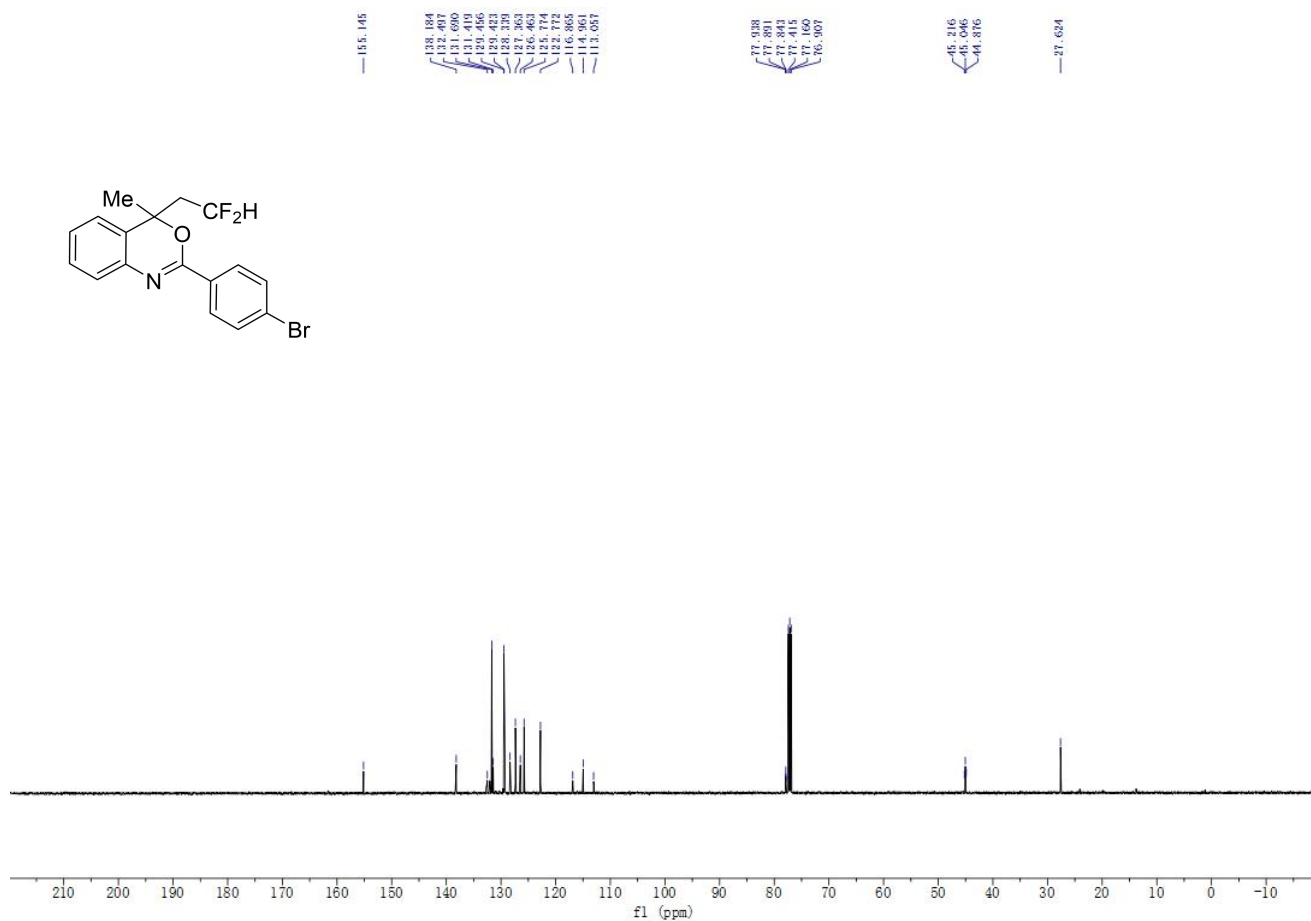

### <sup>19</sup>F NMR Spectrum of **3ha**

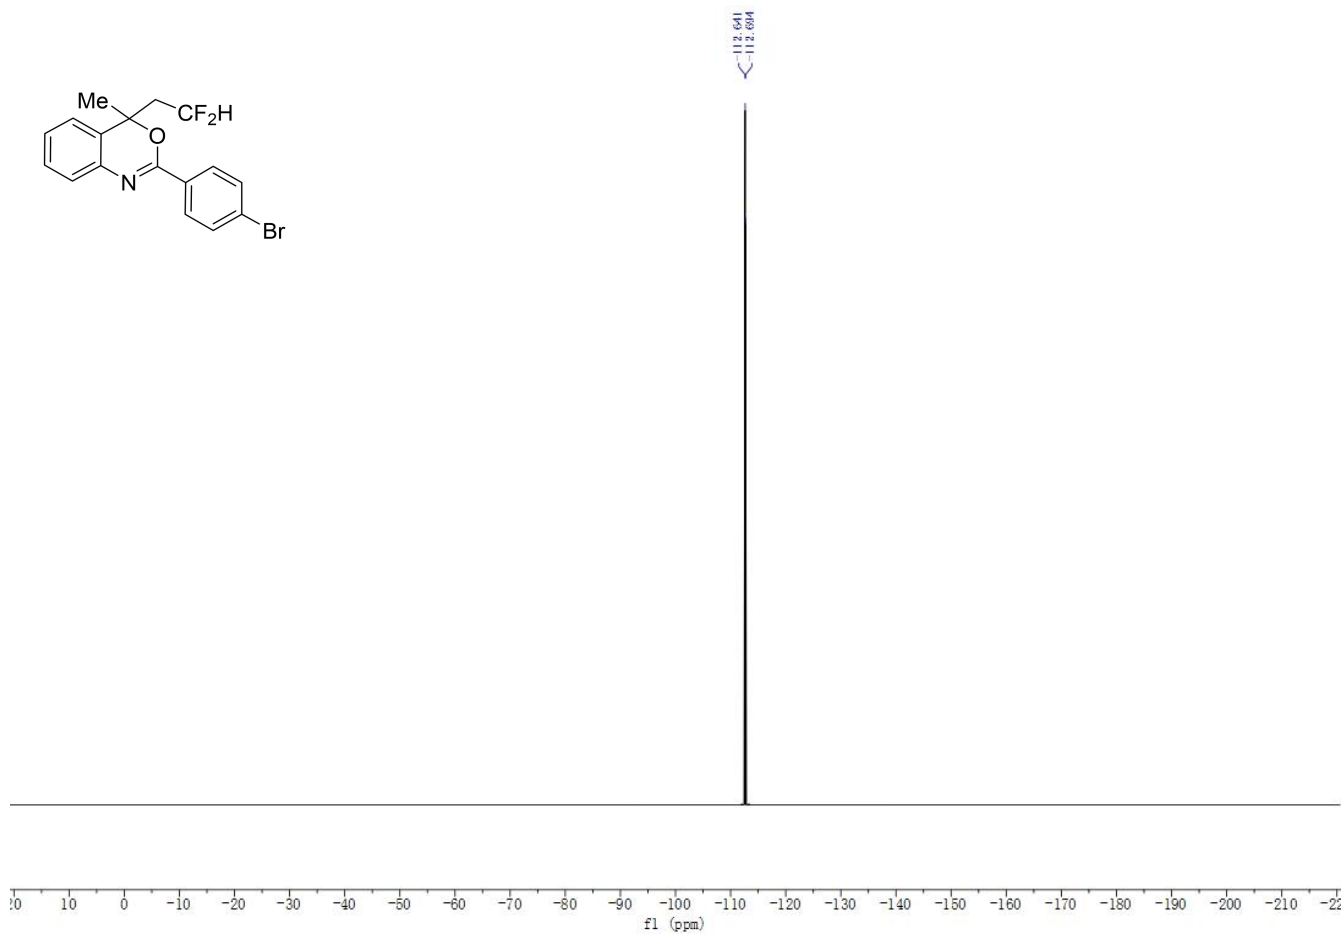

<sup>1</sup>H NMR Spectrum of **3ia**

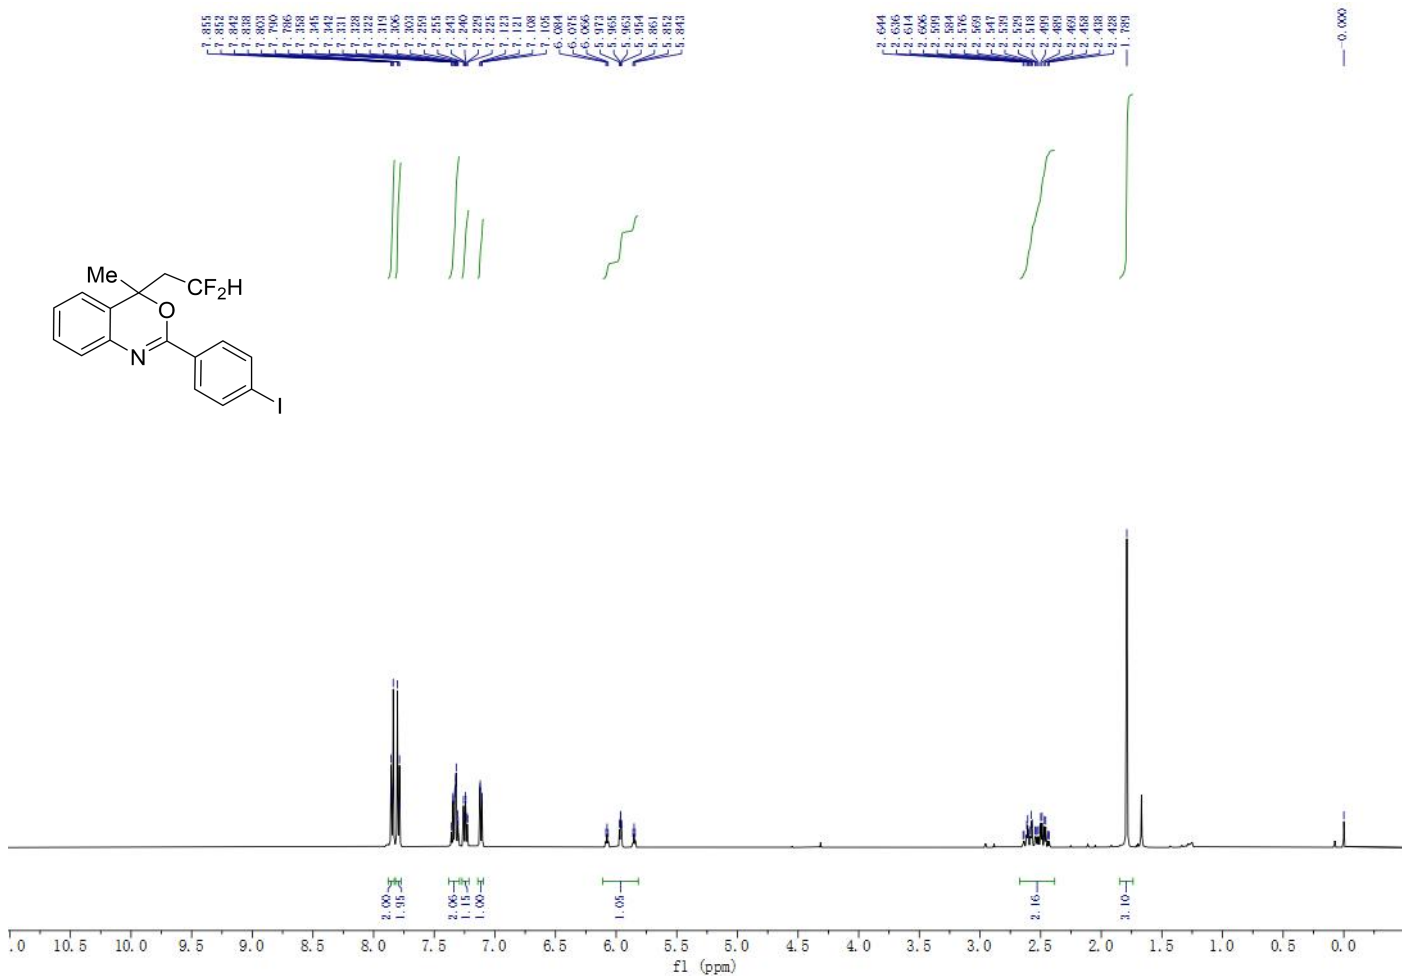

<sup>13</sup>C NMR Spectrum of **3ia**

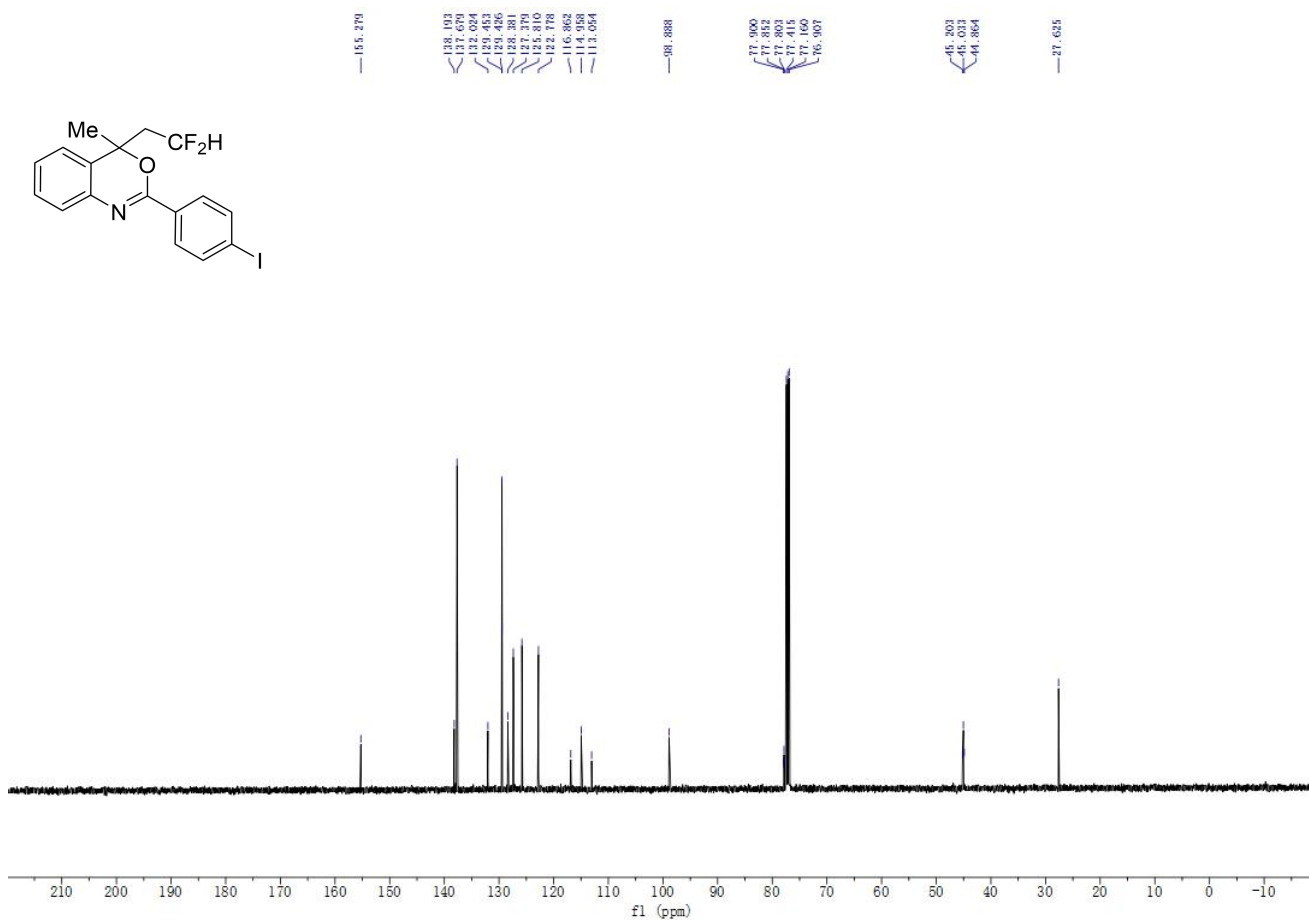

# <sup>19</sup>F NMR Spectrum of **3ia**

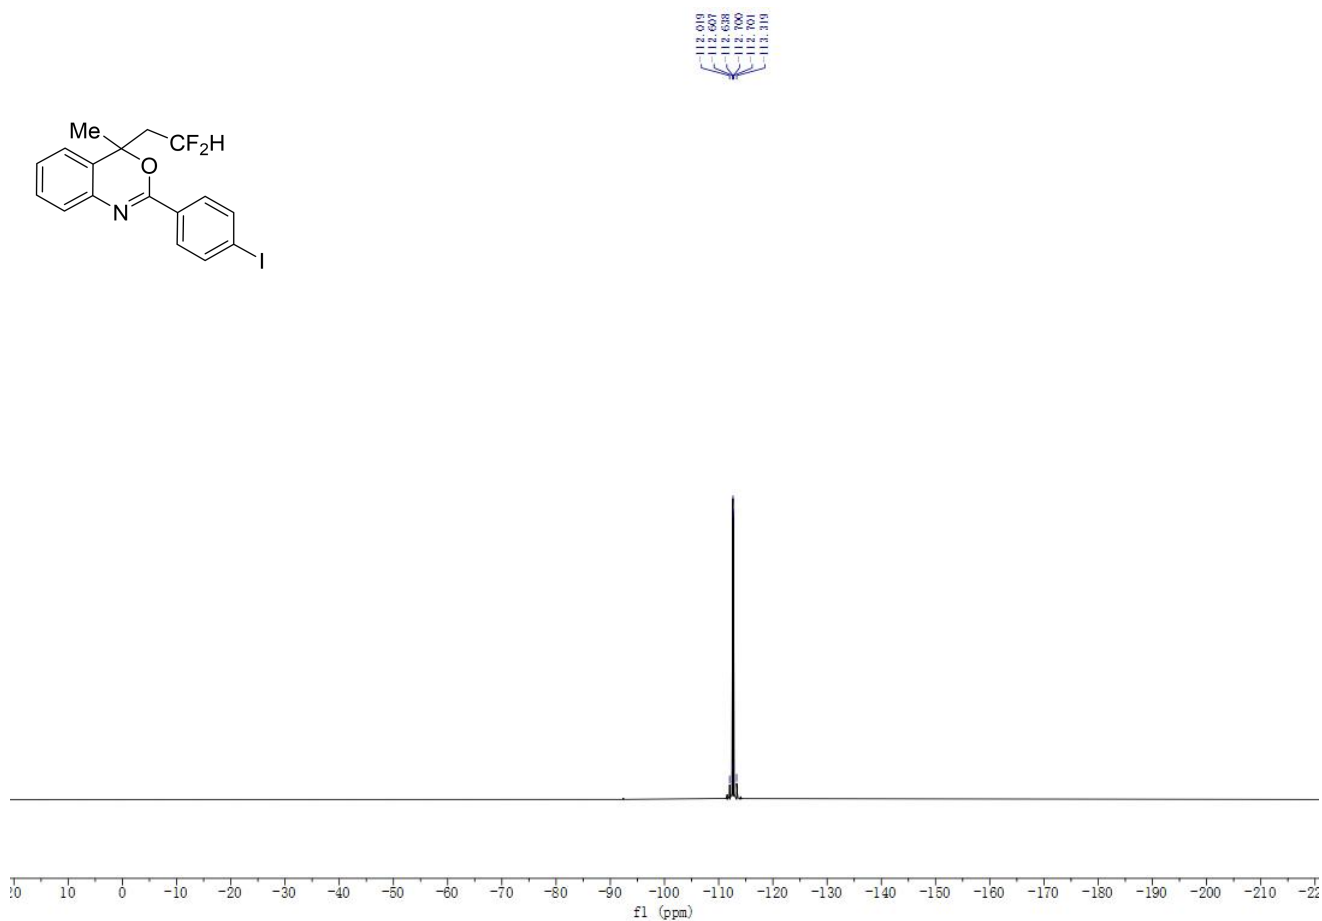

# <sup>1</sup>H NMR Spectrum of **3ja**

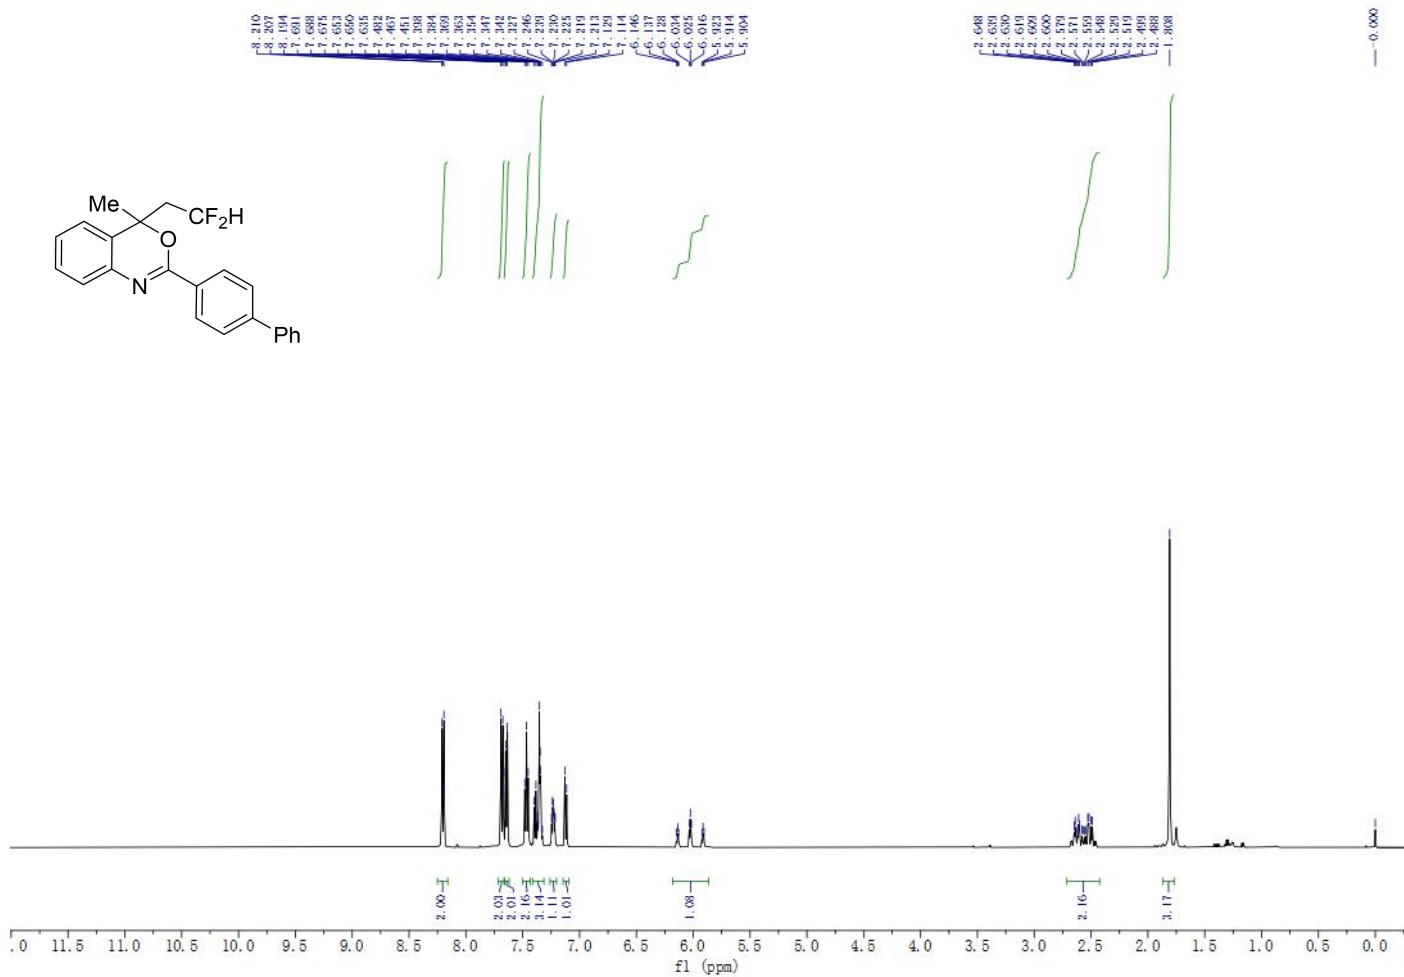

### <sup>13</sup>C NMR Spectrum of 3ja

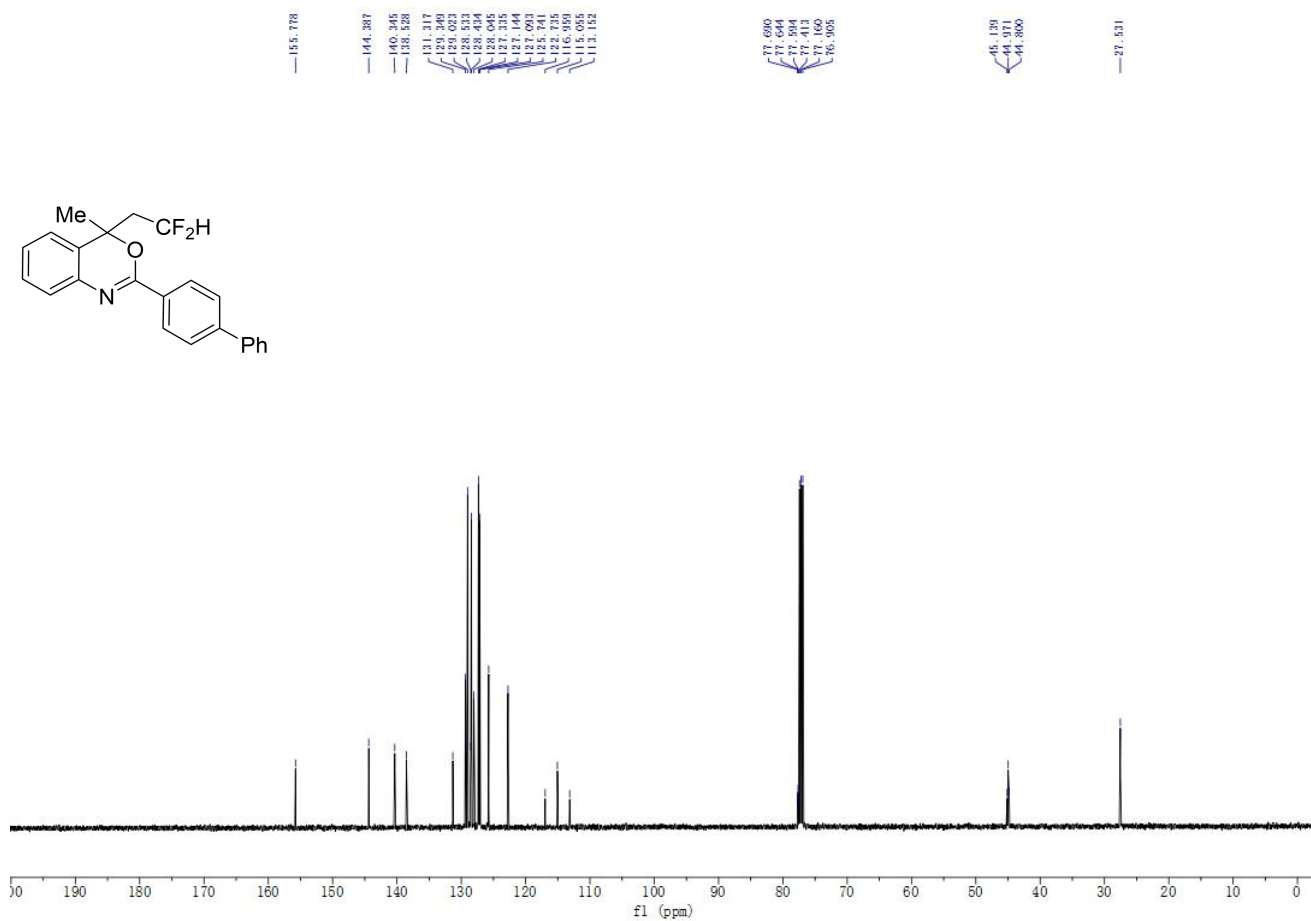

### <sup>19</sup>F NMR Spectrum of 3ja

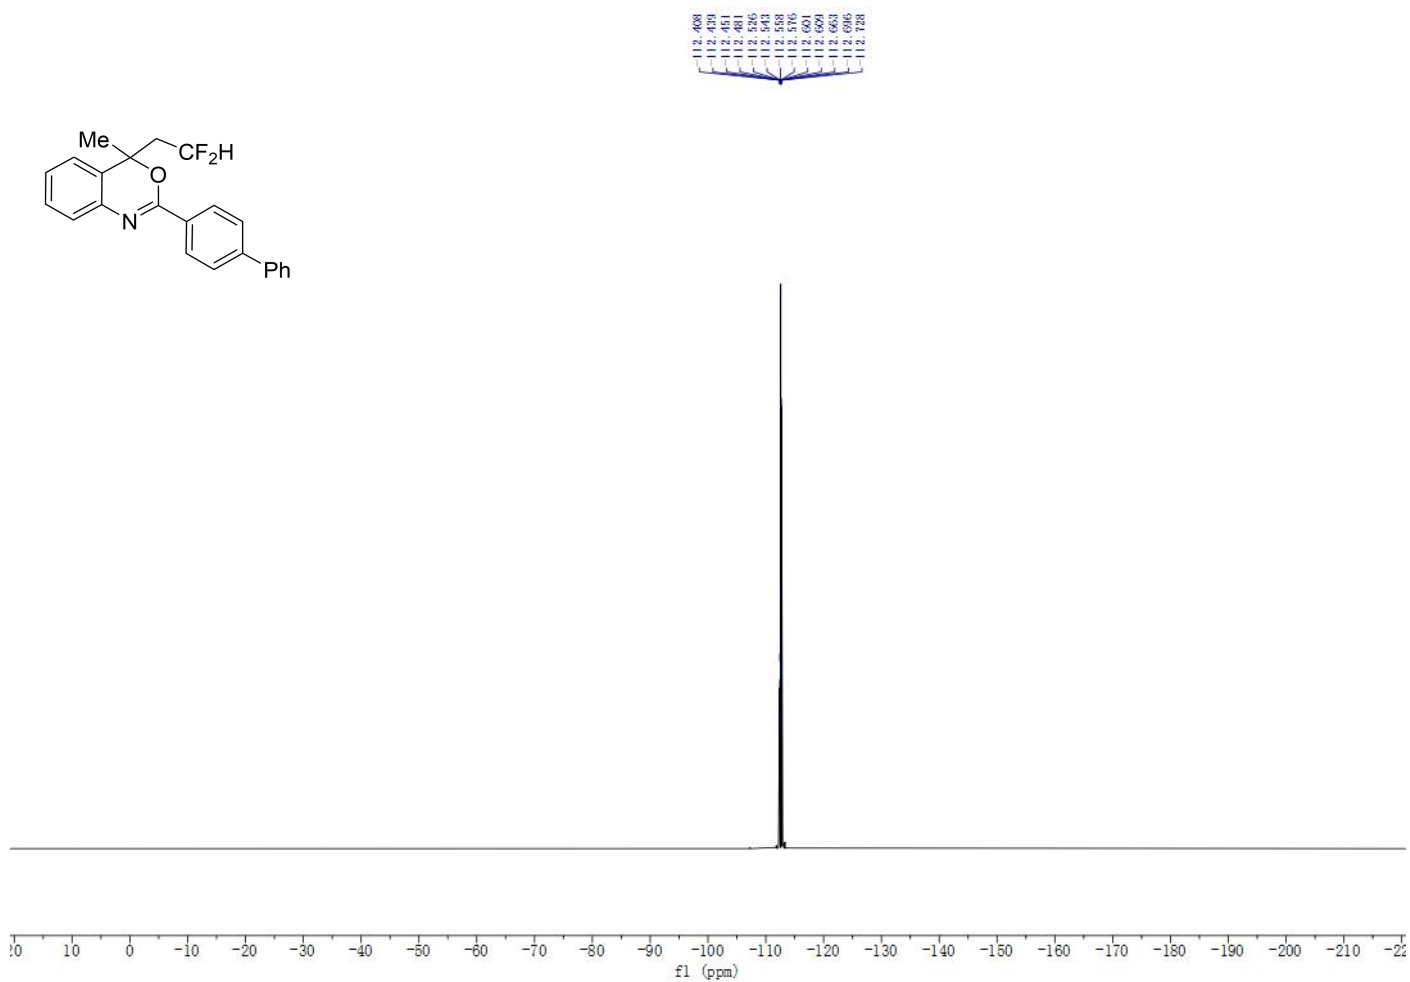

### <sup>1</sup>H NMR Spectrum of **3ka**

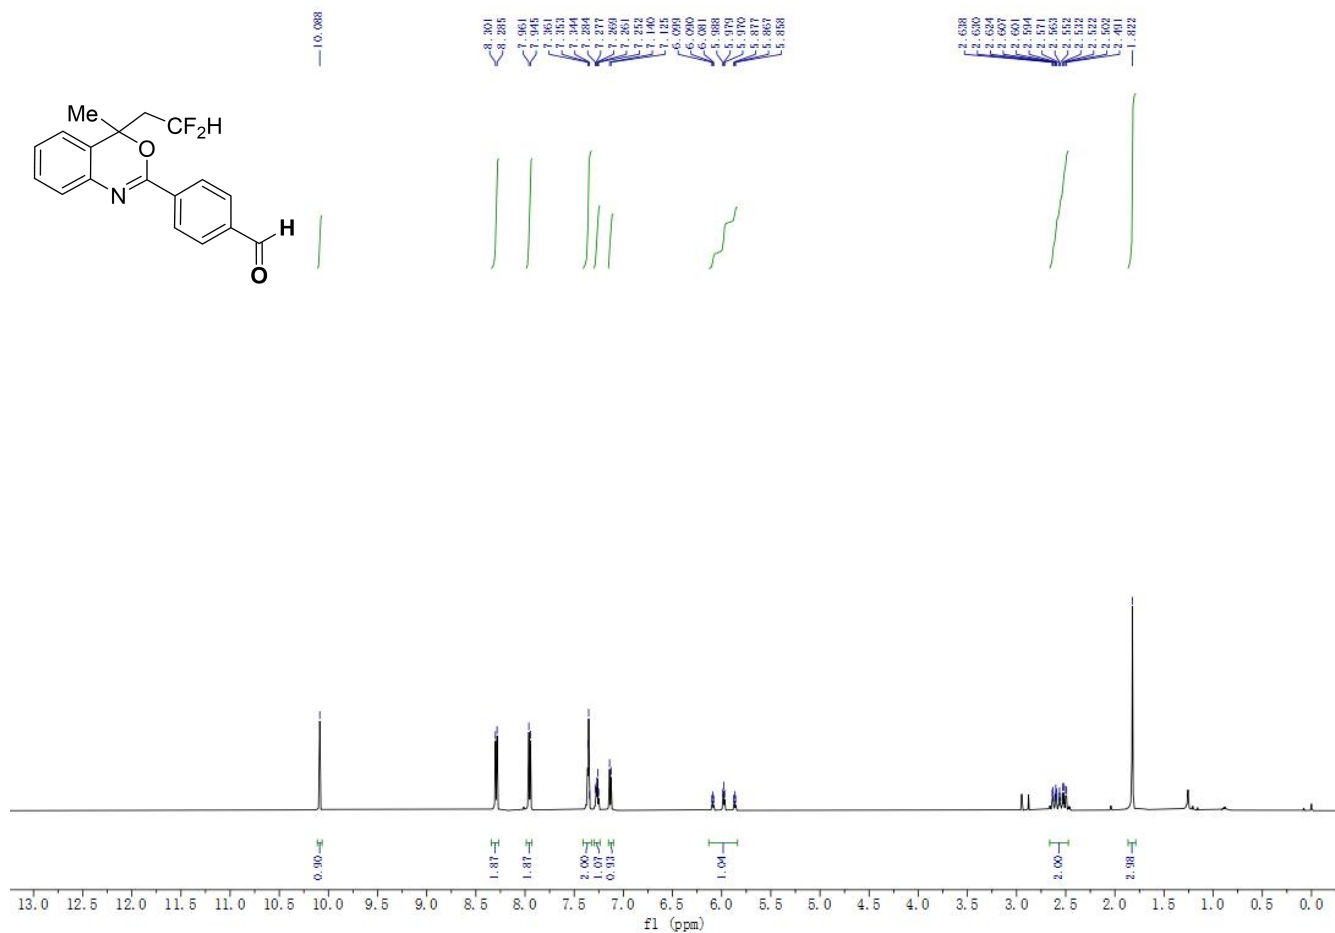

### <sup>13</sup>C NMR Spectrum of **3ka**

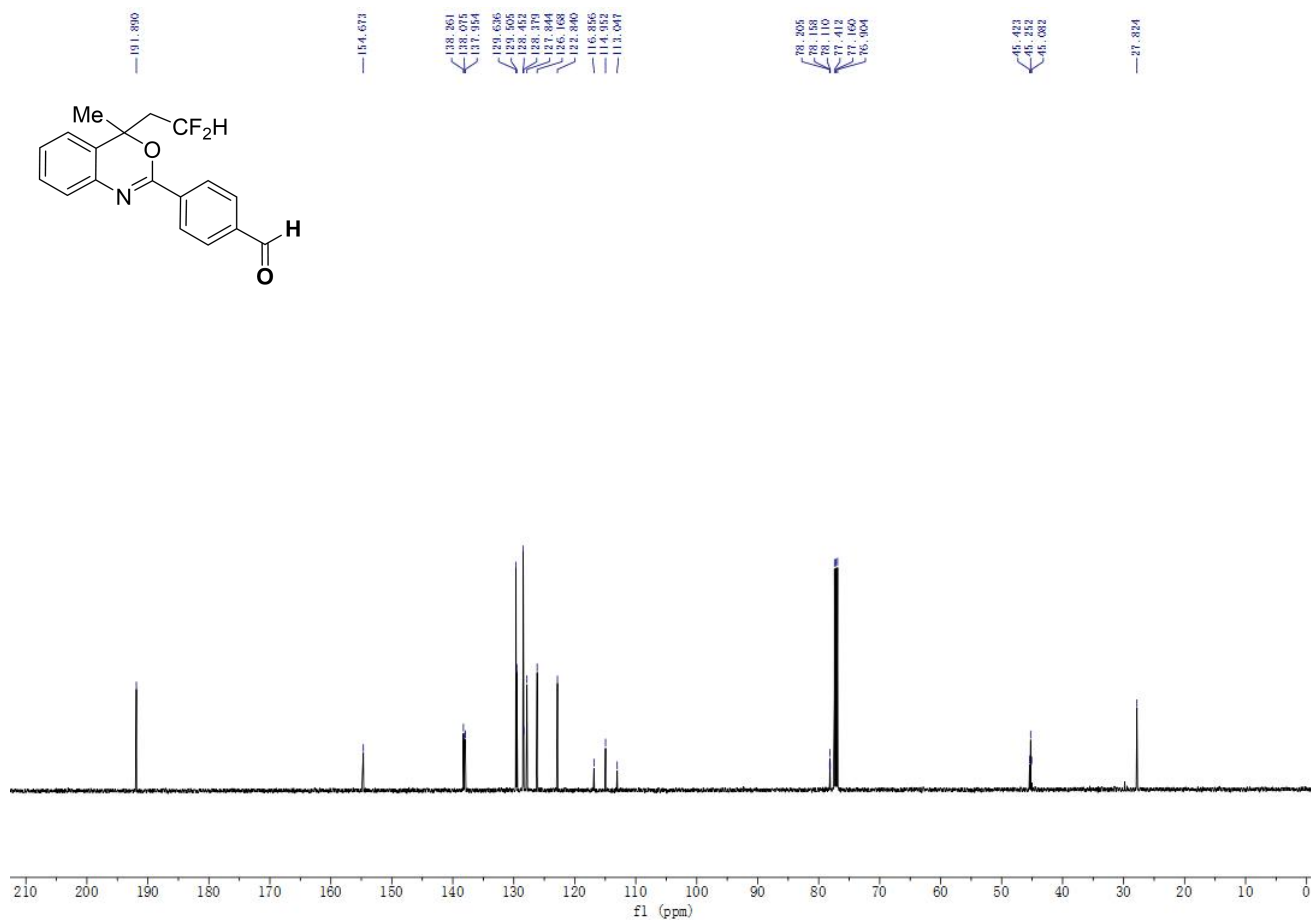

<sup>19</sup>F NMR Spectrum of **3ka**

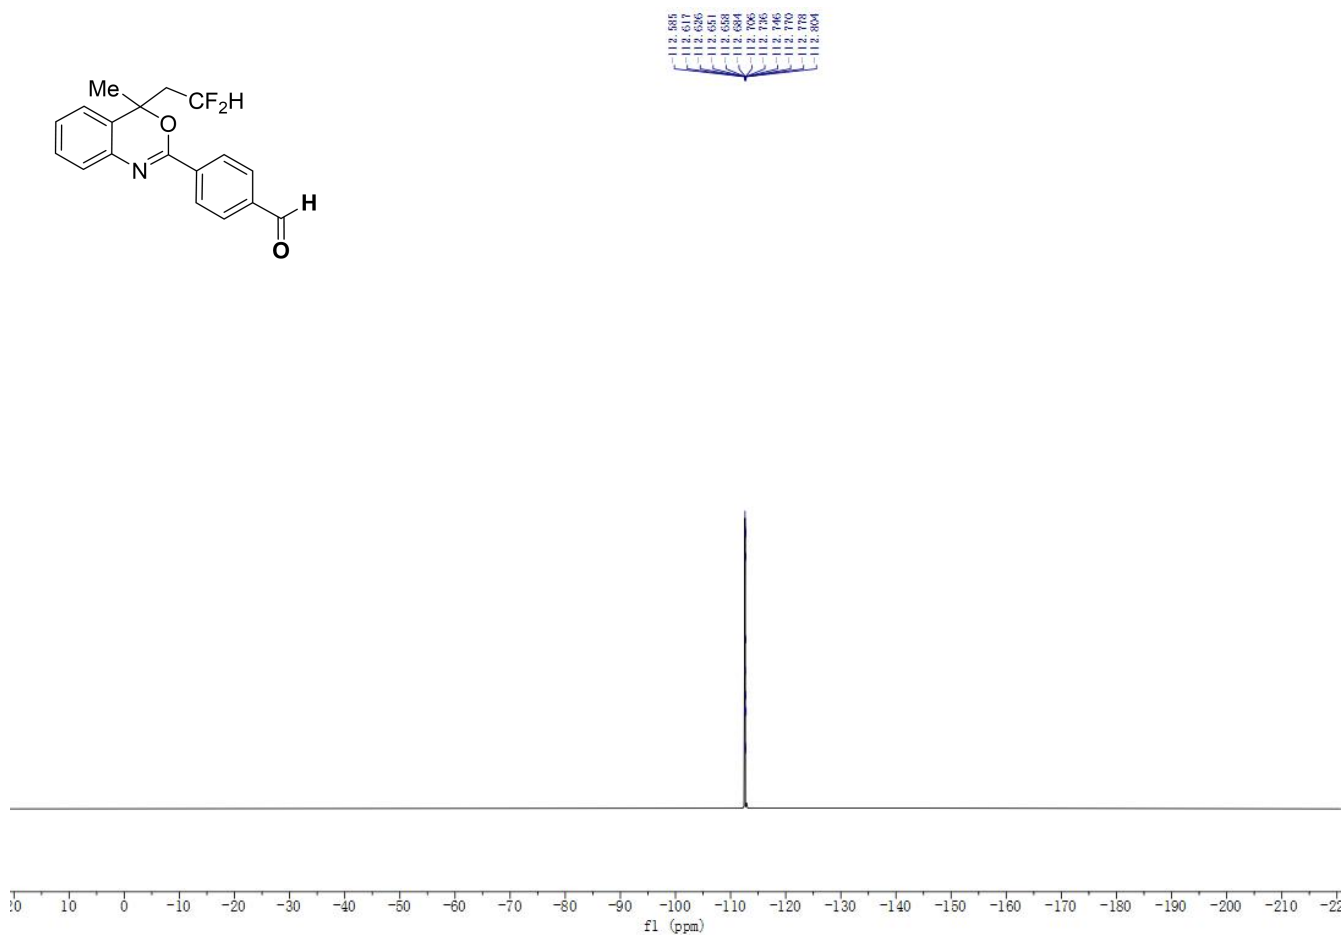

<sup>1</sup>H NMR Spectrum of **3la**

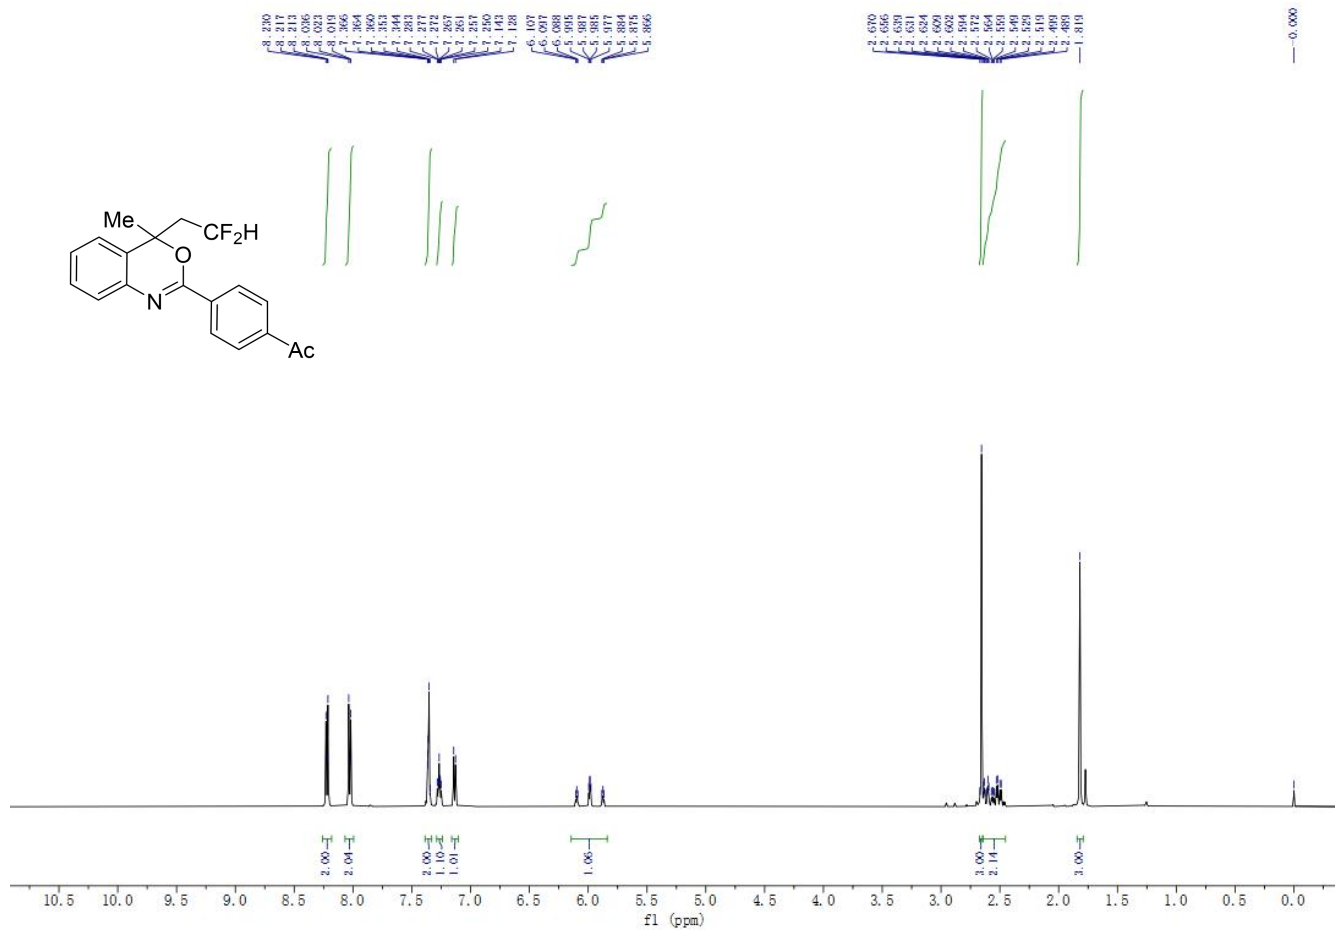



### <sup>13</sup>C NMR Spectrum of 31a

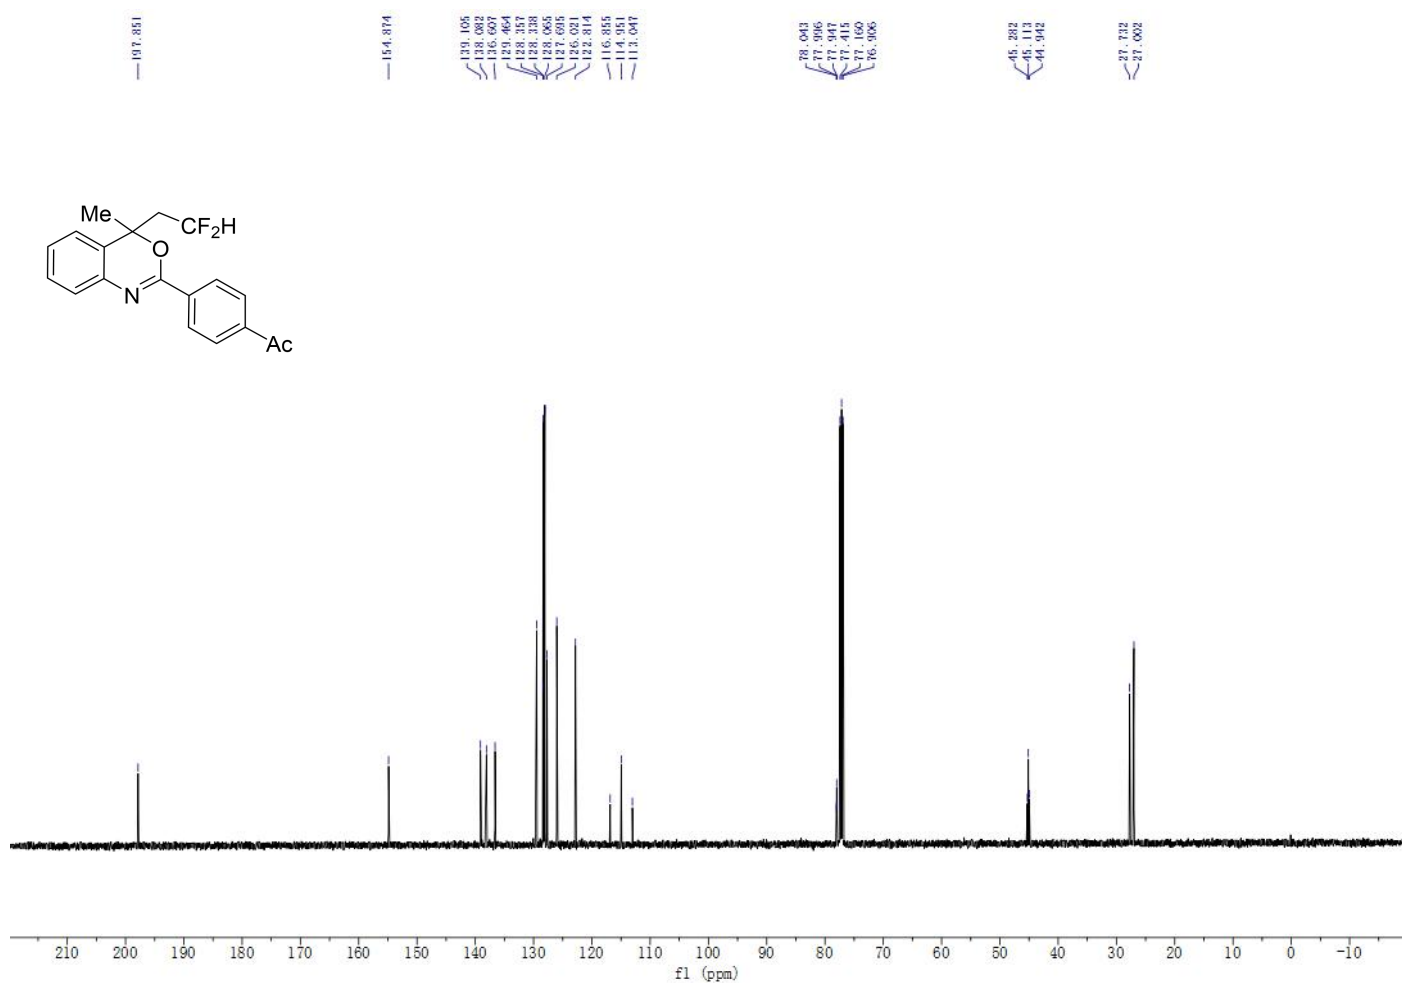

### <sup>19</sup>F NMR Spectrum of 31a

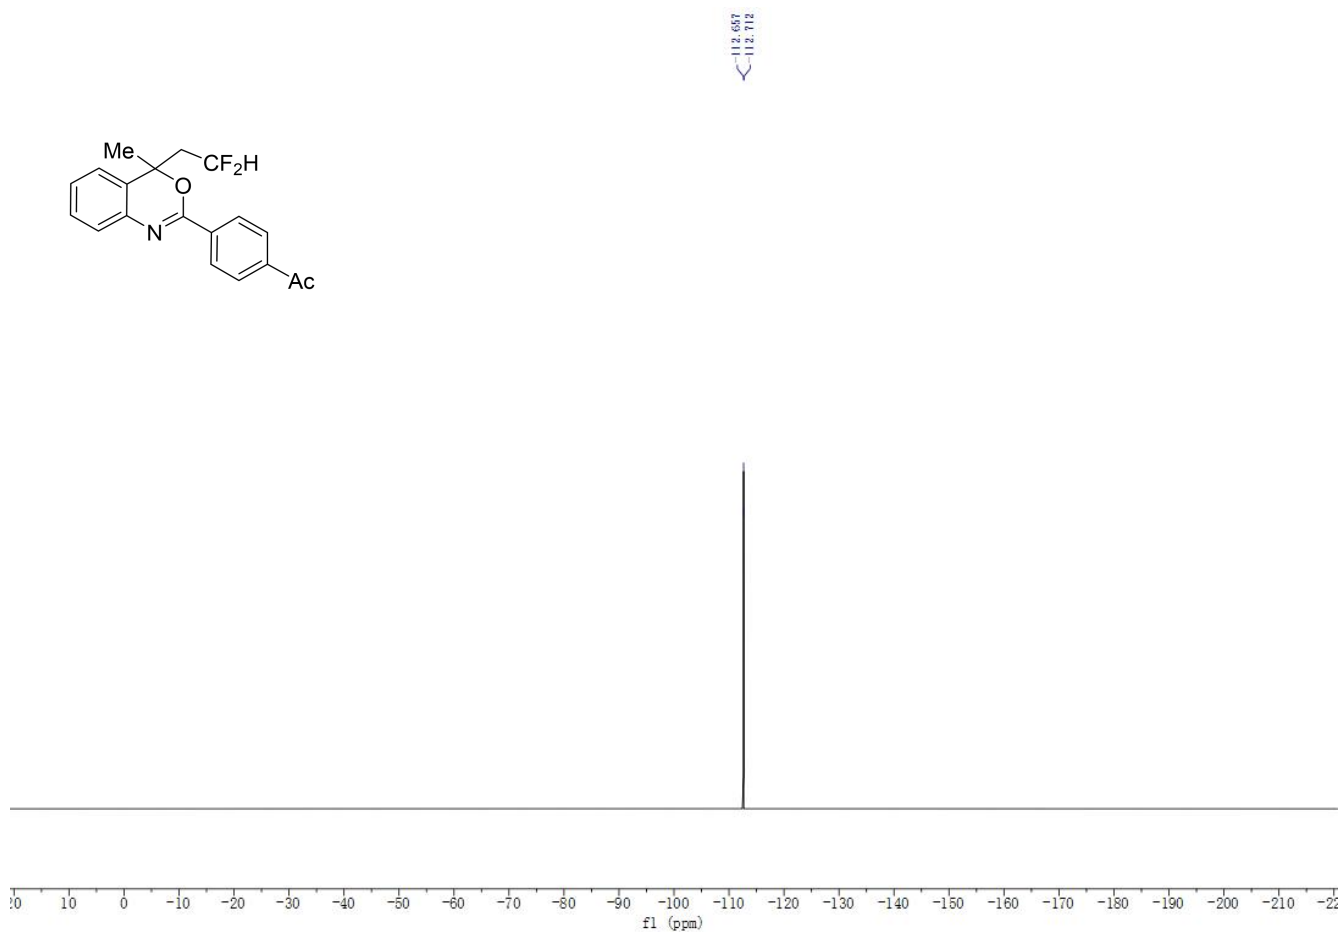

<sup>1</sup>H NMR Spectrum of **3ma**

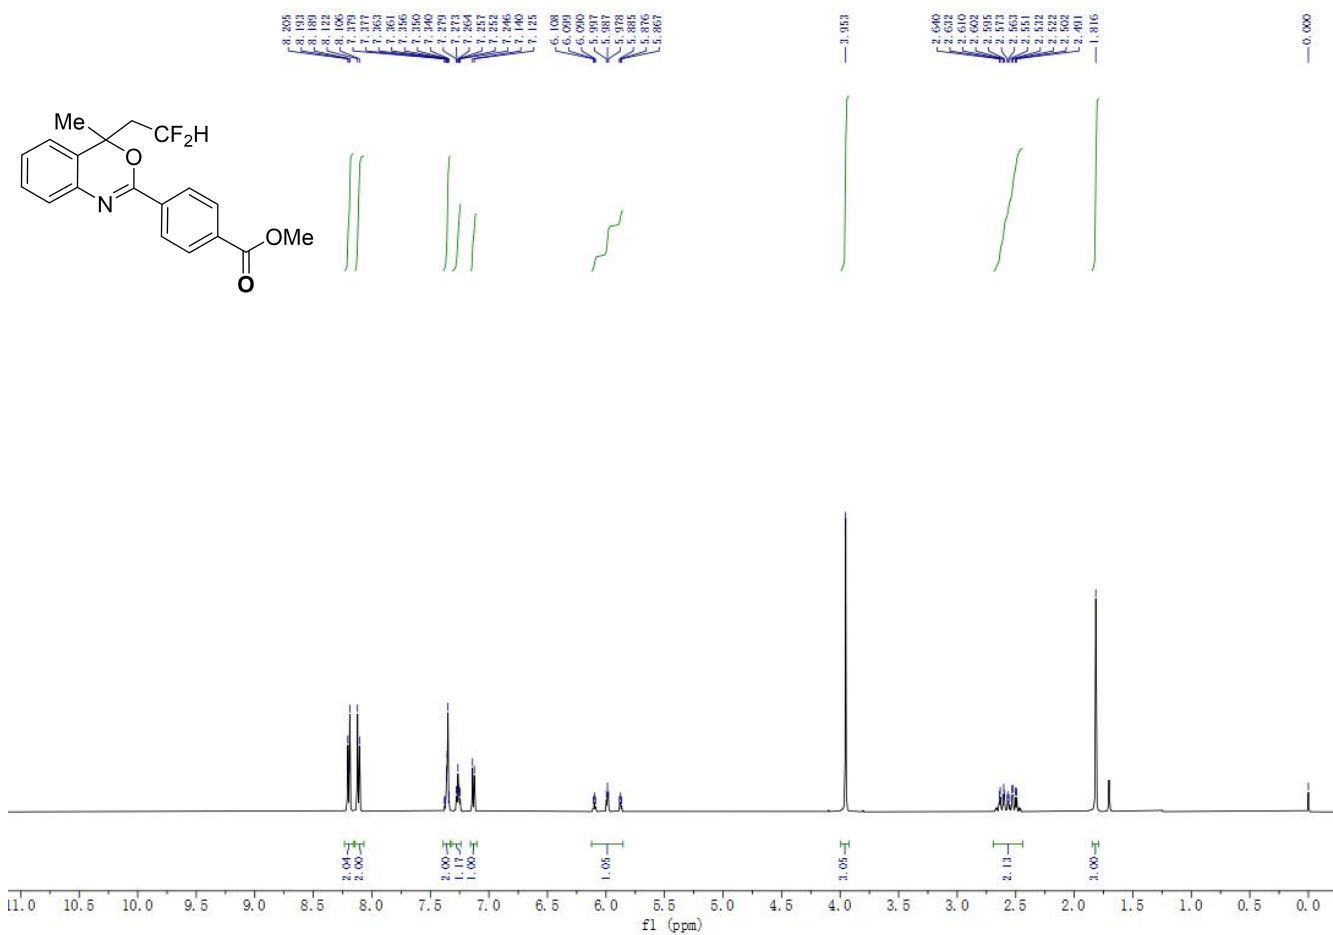

<sup>13</sup>C NMR Spectrum of **3ma**

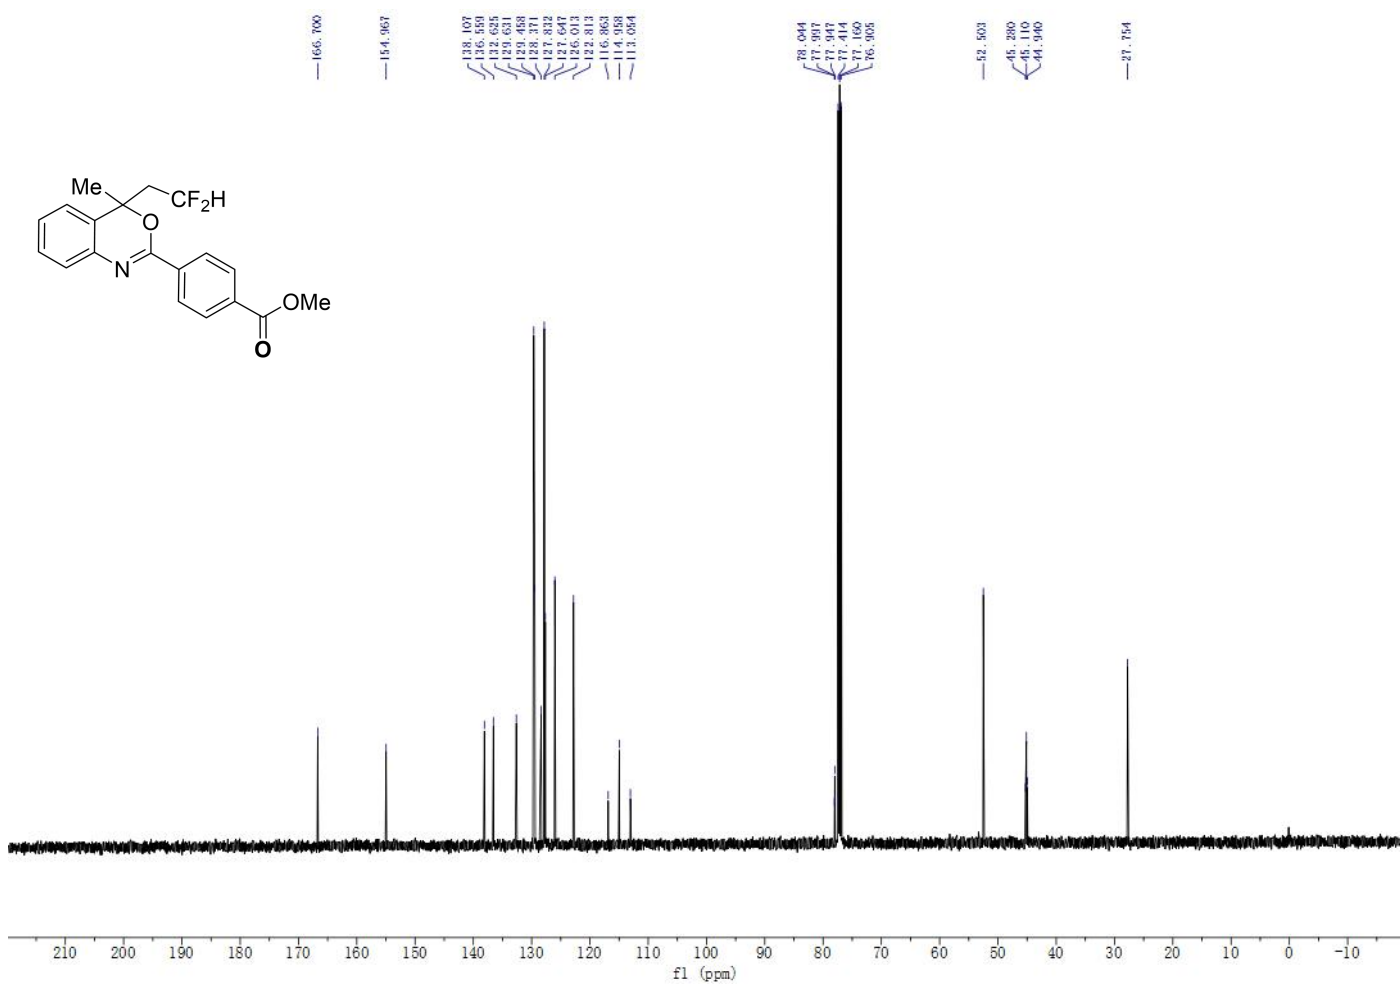

# <sup>19</sup>F NMR Spectrum of **3ma**

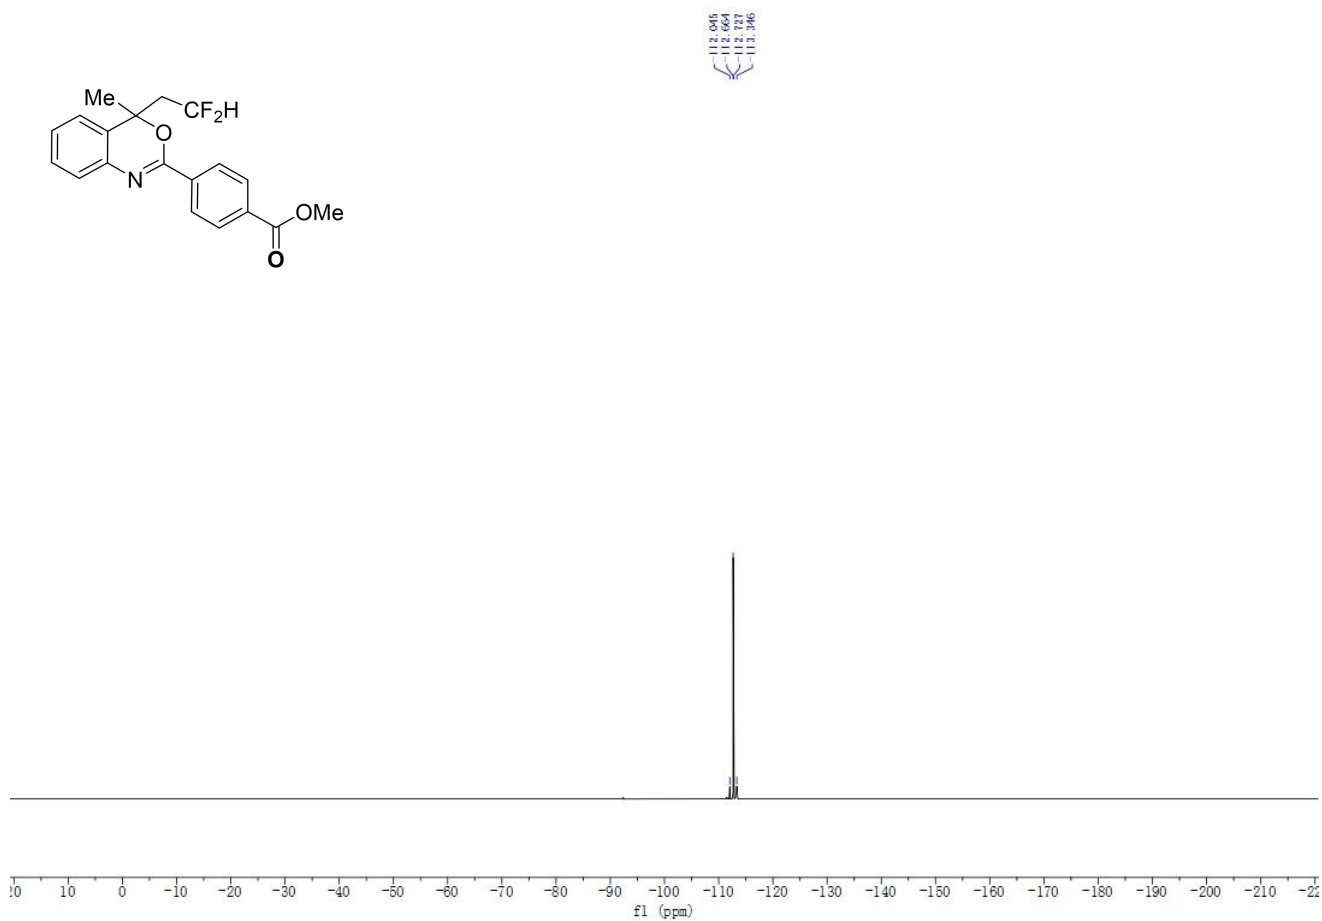

# <sup>1</sup>H NMR Spectrum of **3na**

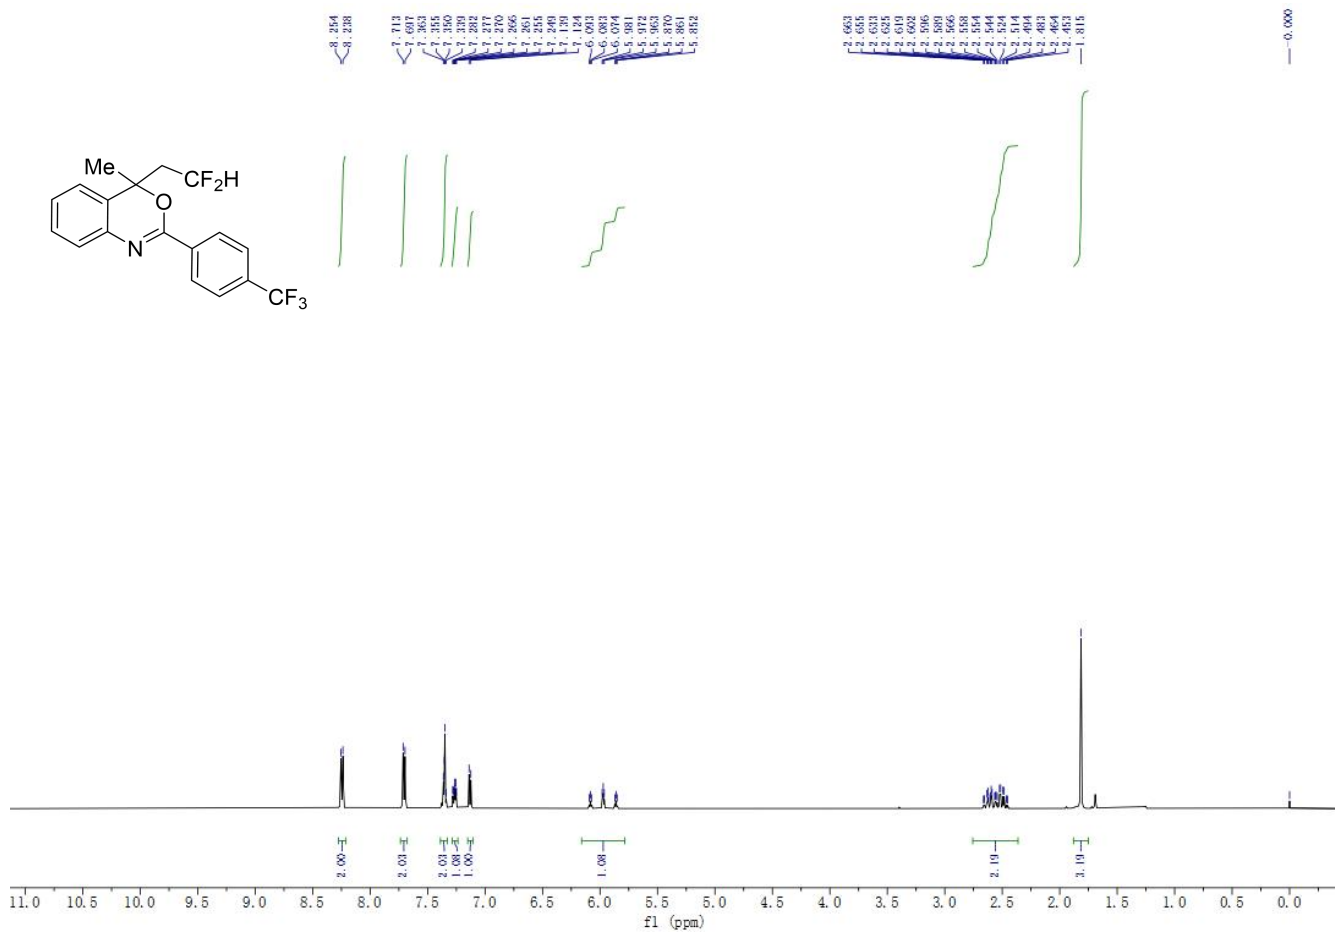

### <sup>13</sup>C NMR Spectrum of 3na

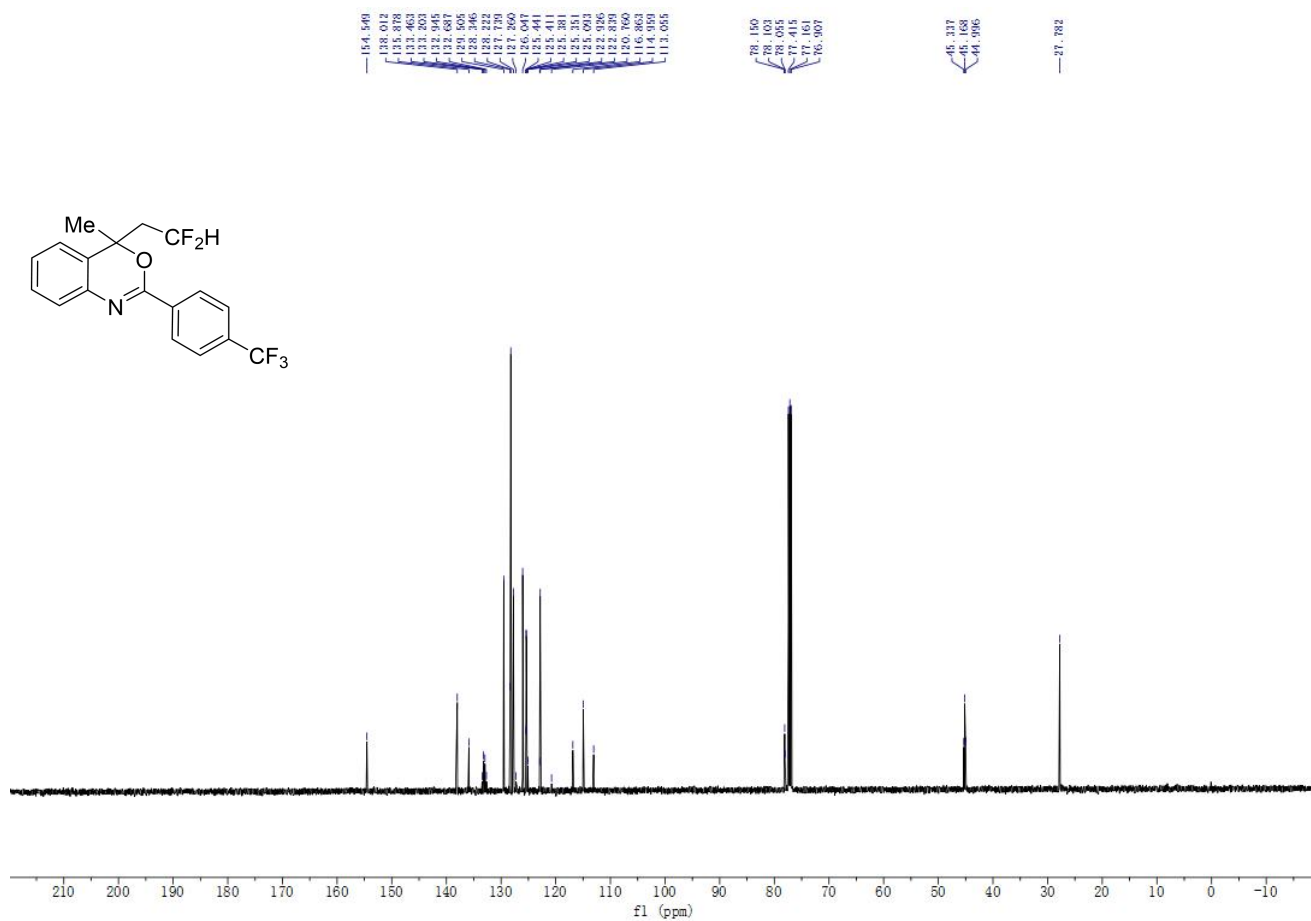

### <sup>19</sup>F NMR Spectrum of 3na

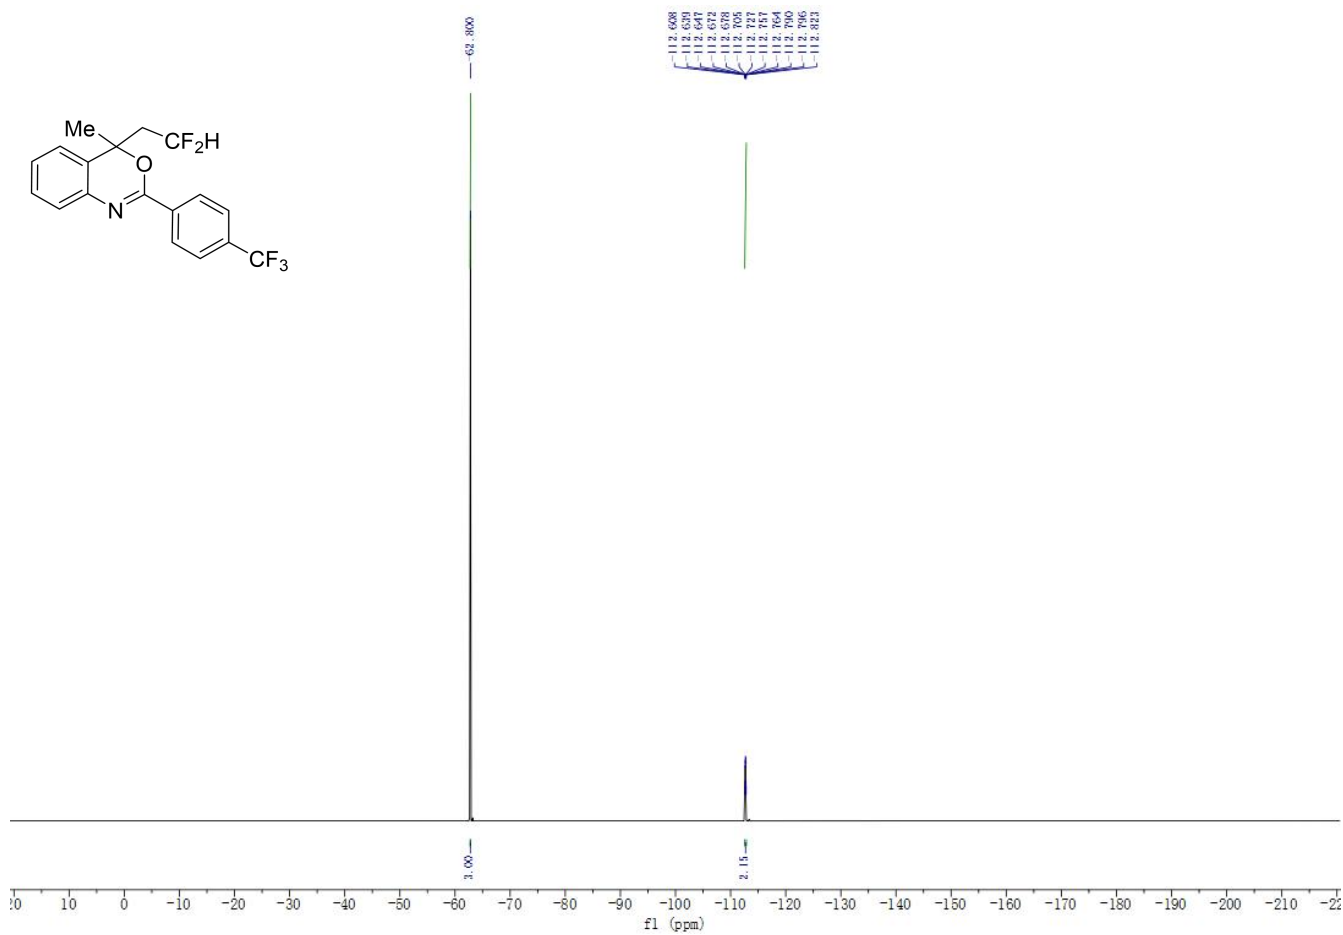

<sup>1</sup>H NMR Spectrum of **30a**

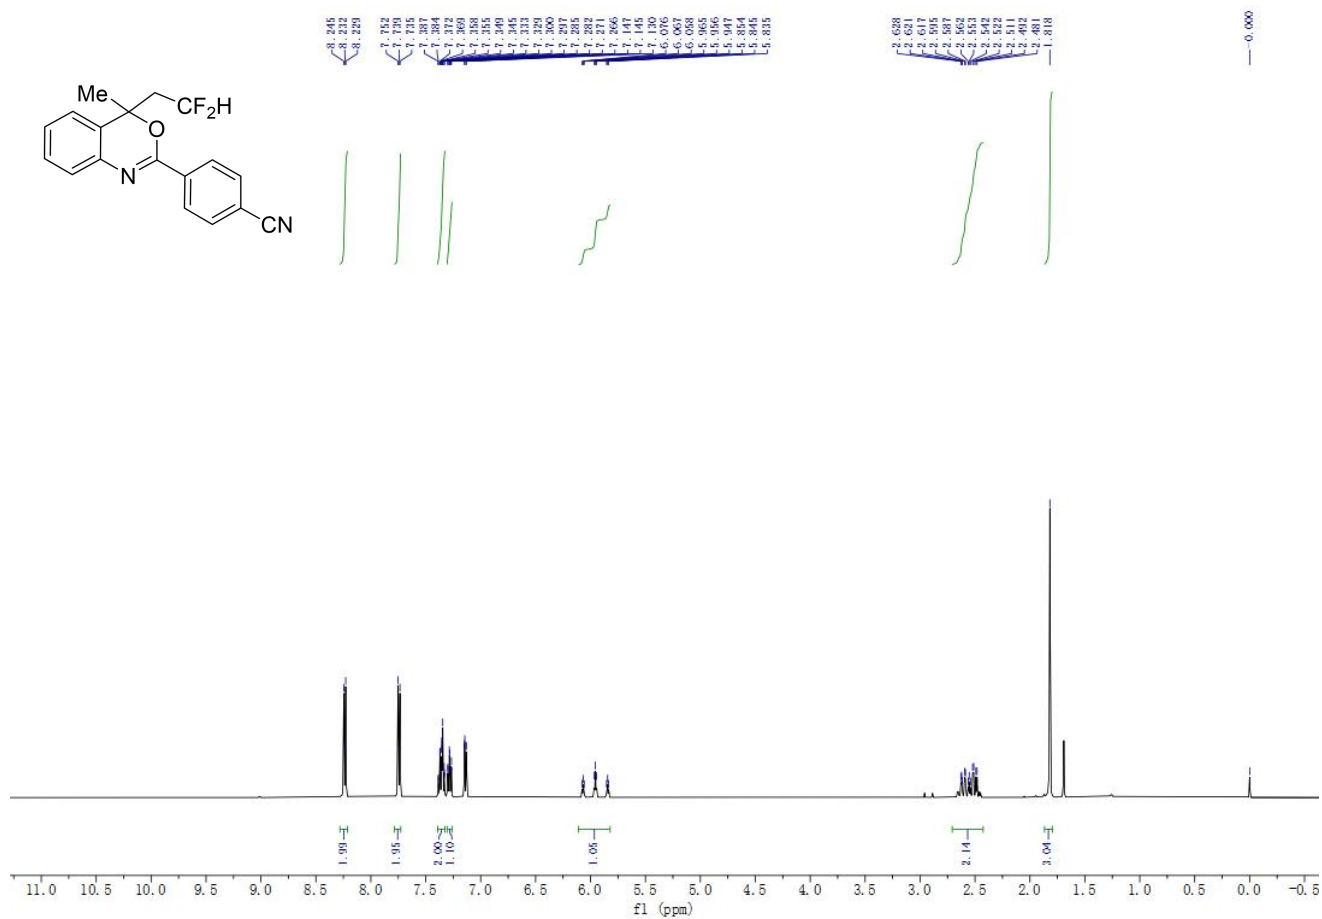

<sup>13</sup>C NMR Spectrum of **30a**

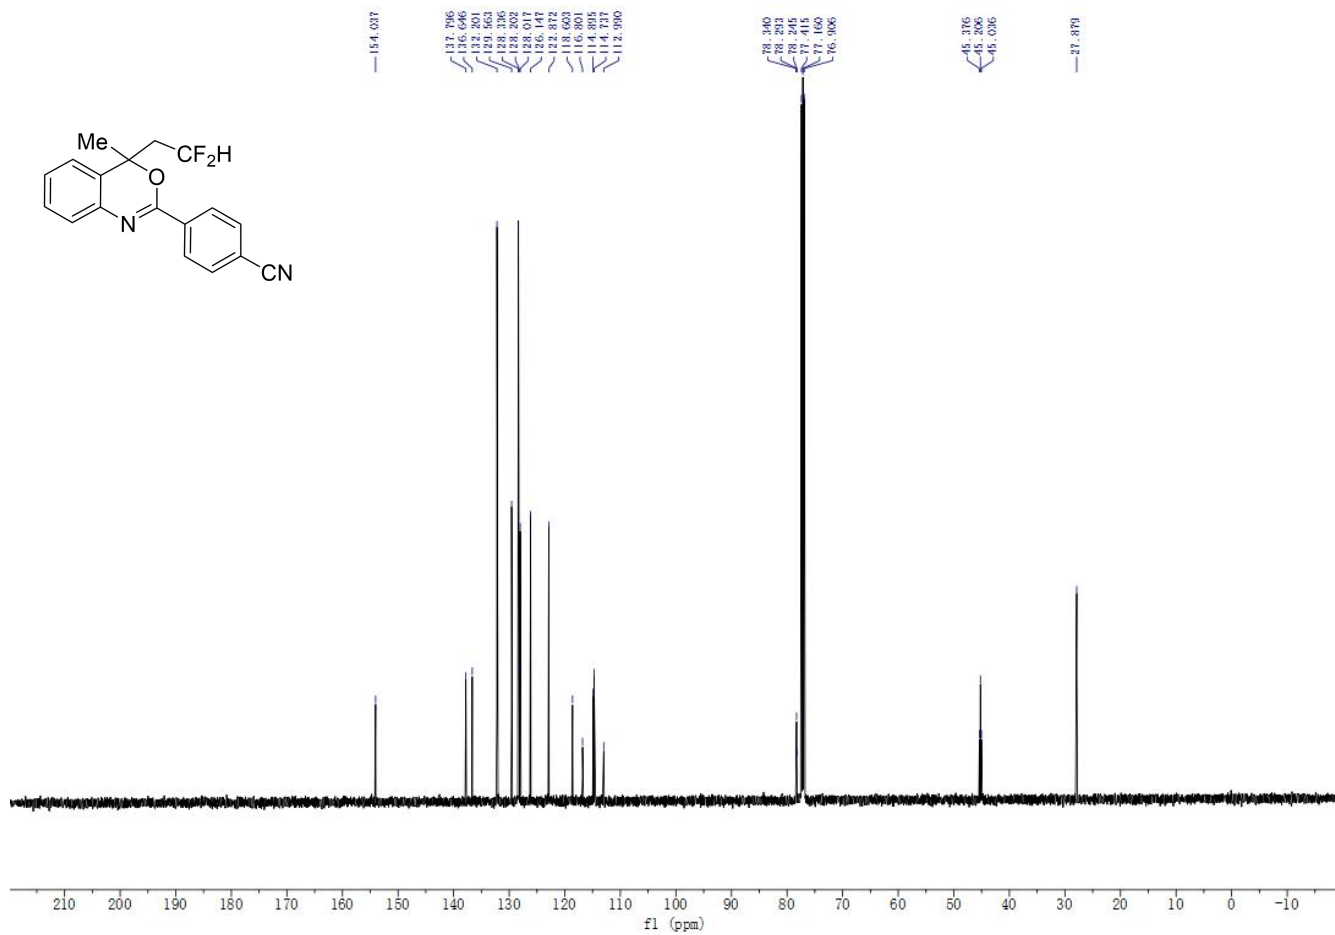

<sup>19</sup>F NMR Spectrum of **30a**

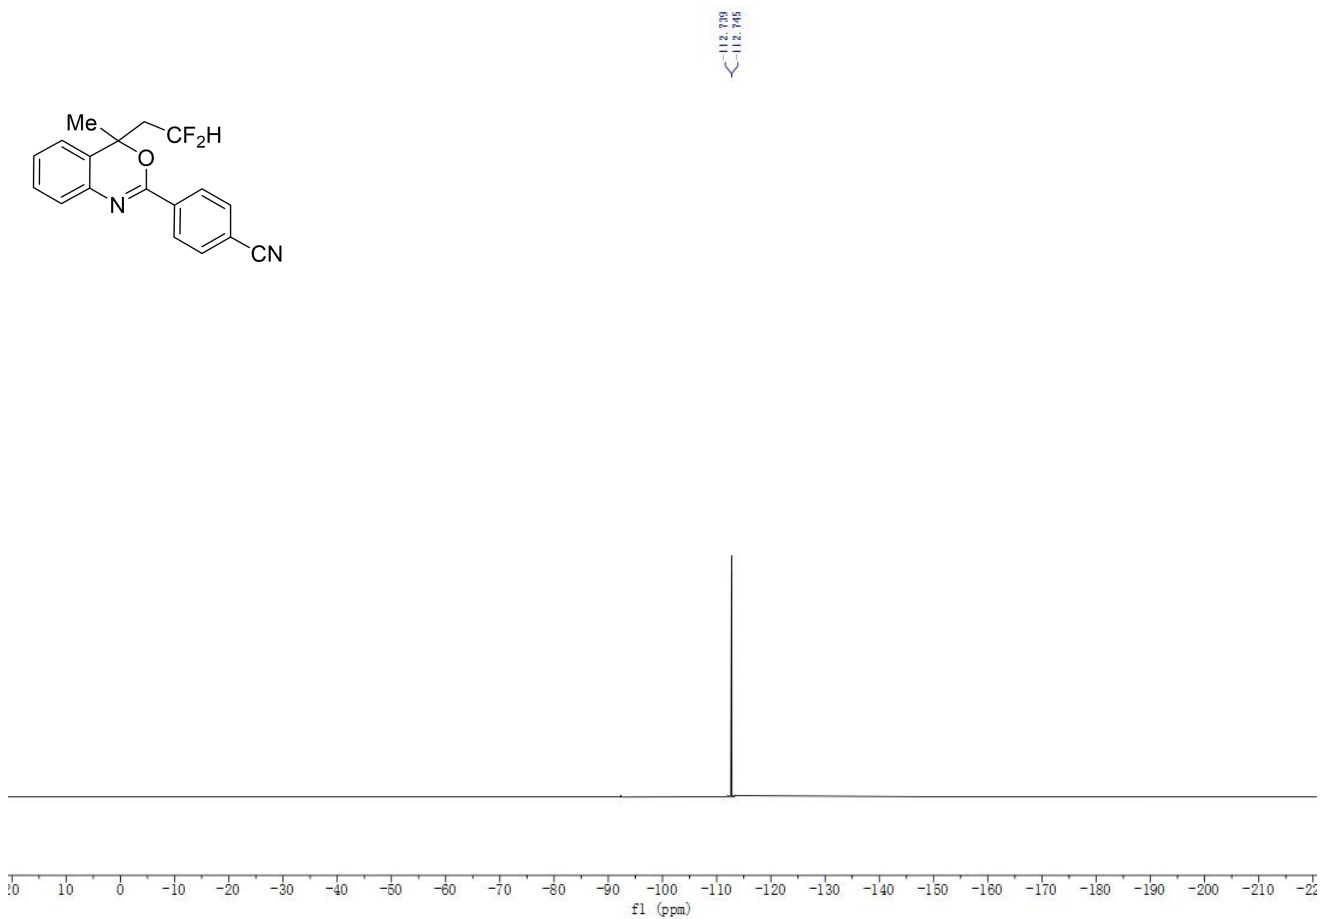

<sup>1</sup>H NMR Spectrum of **3pa**

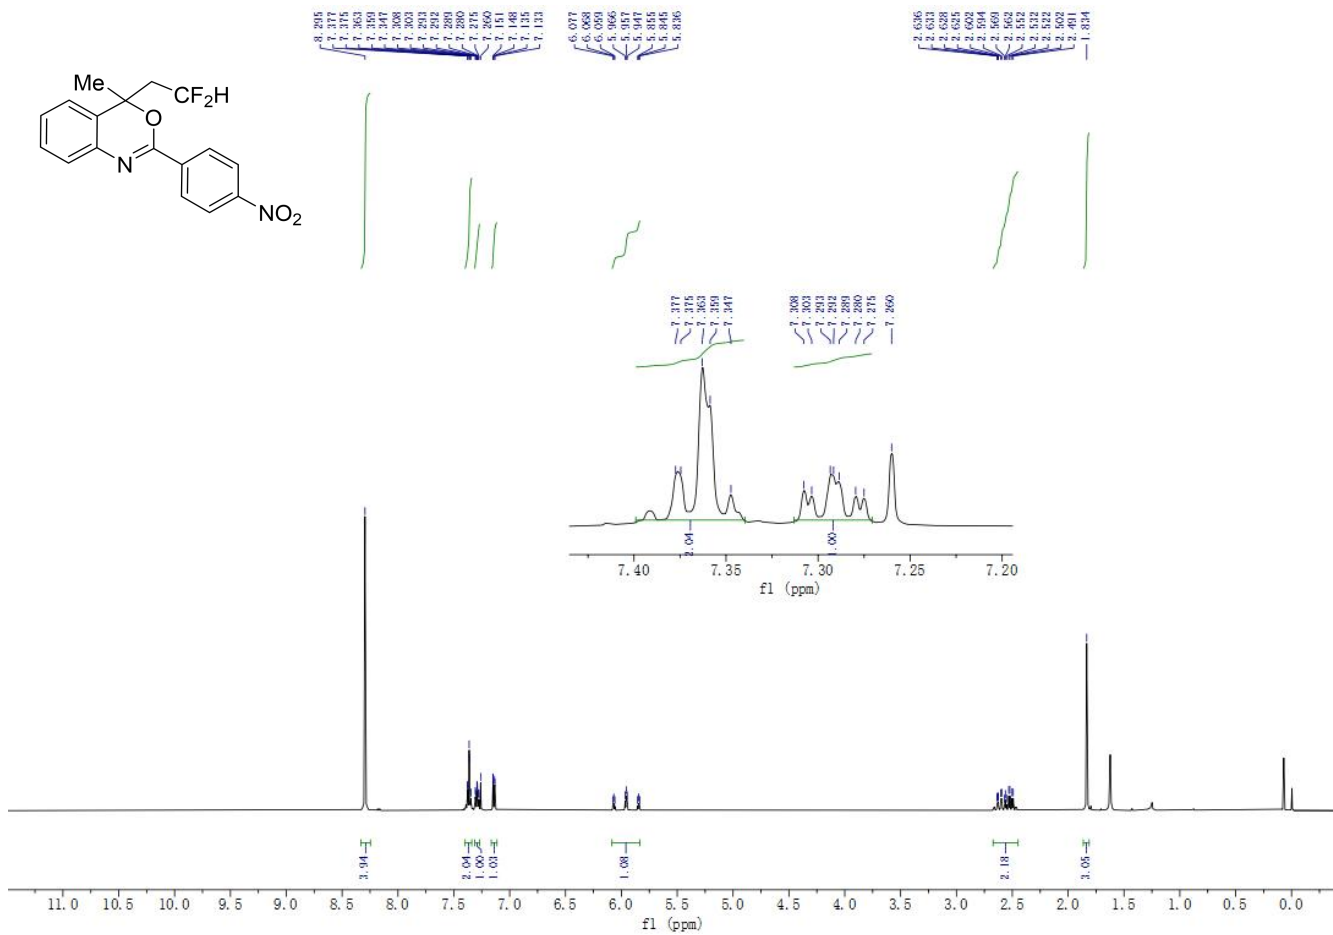

### <sup>13</sup>C NMR Spectrum of 3pa

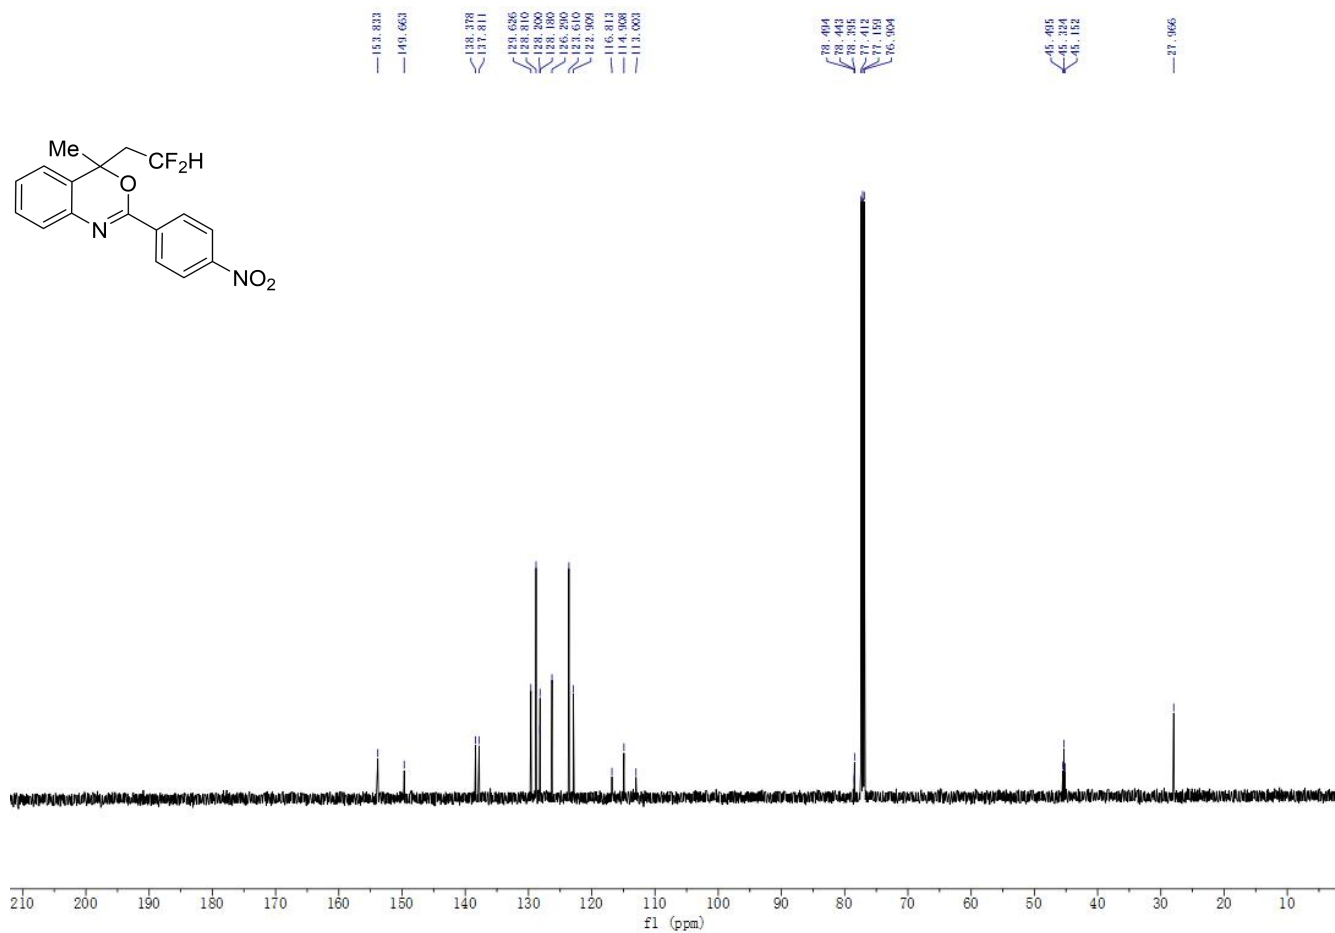

### <sup>19</sup>F NMR Spectrum of 3pa

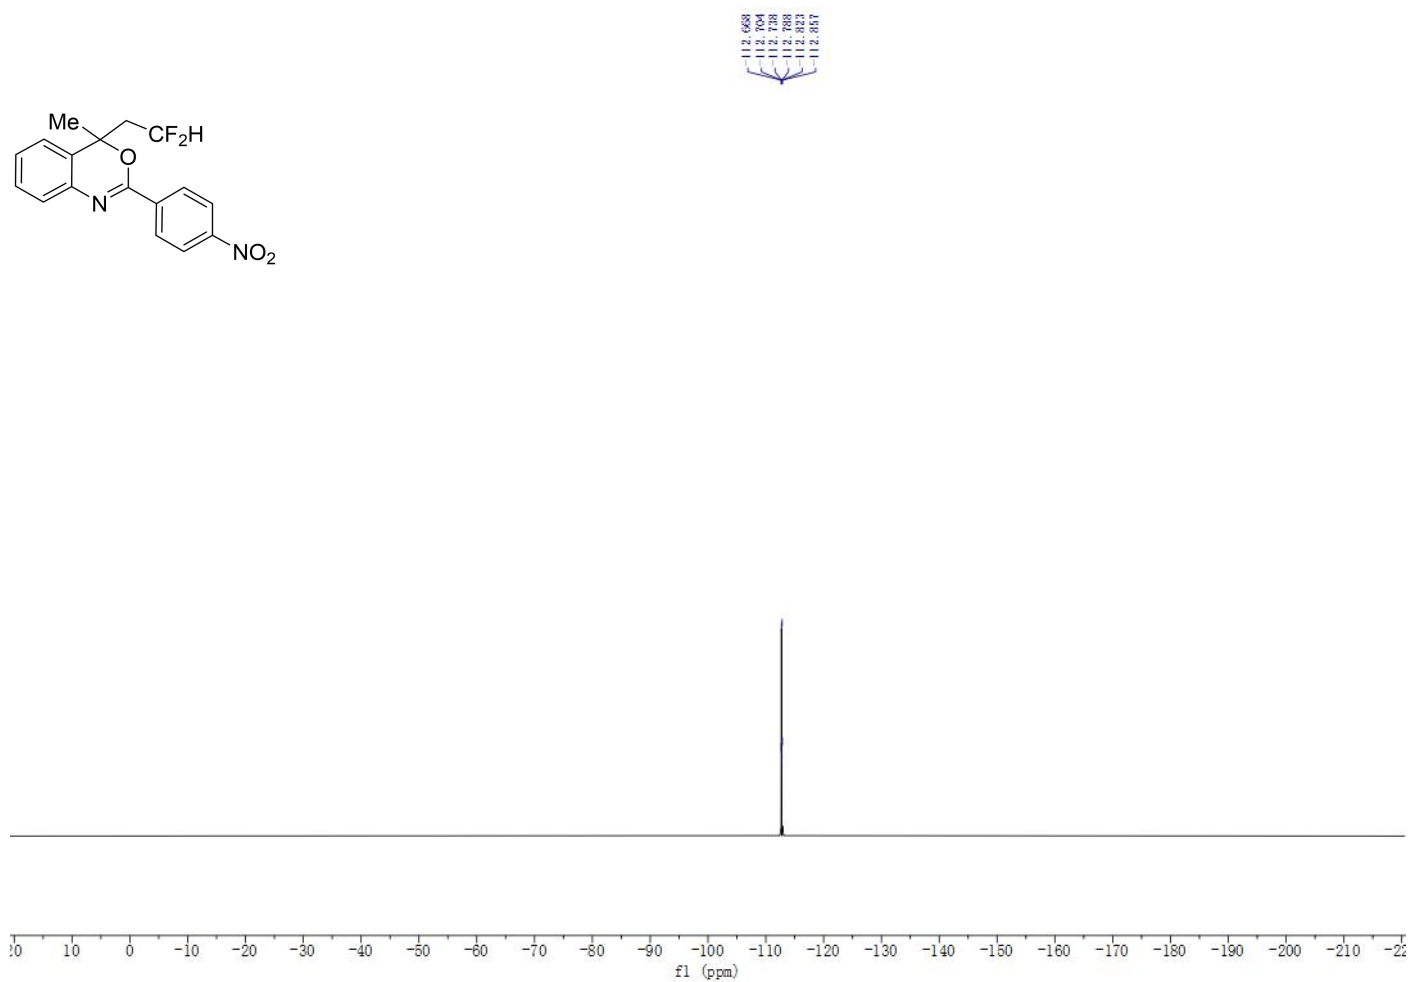

<sup>1</sup>H NMR Spectrum of **3qa**

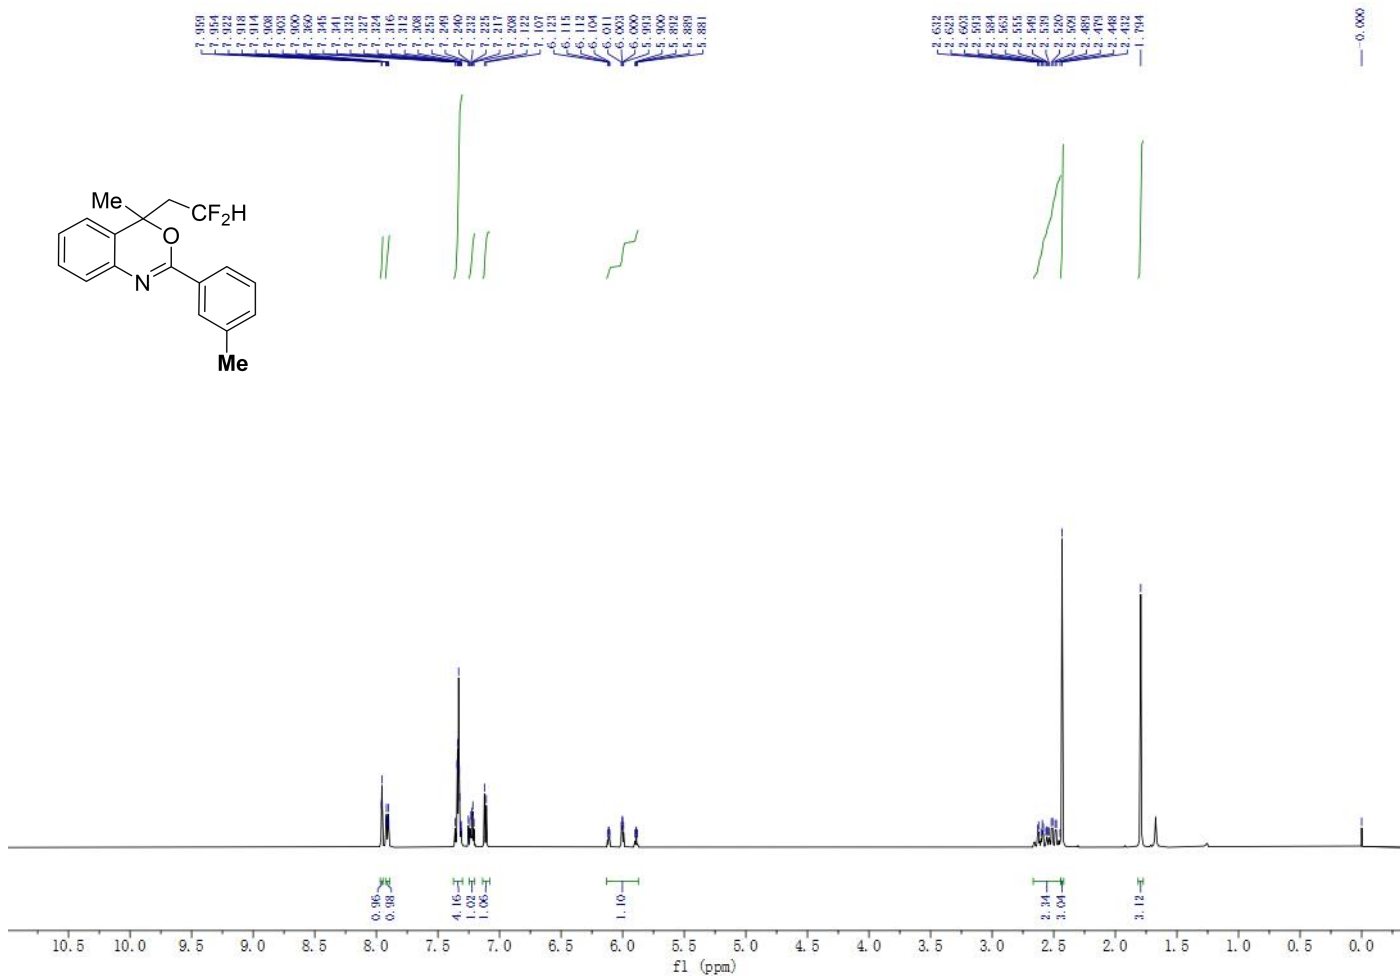

<sup>13</sup>C NMR Spectrum of **3qa**

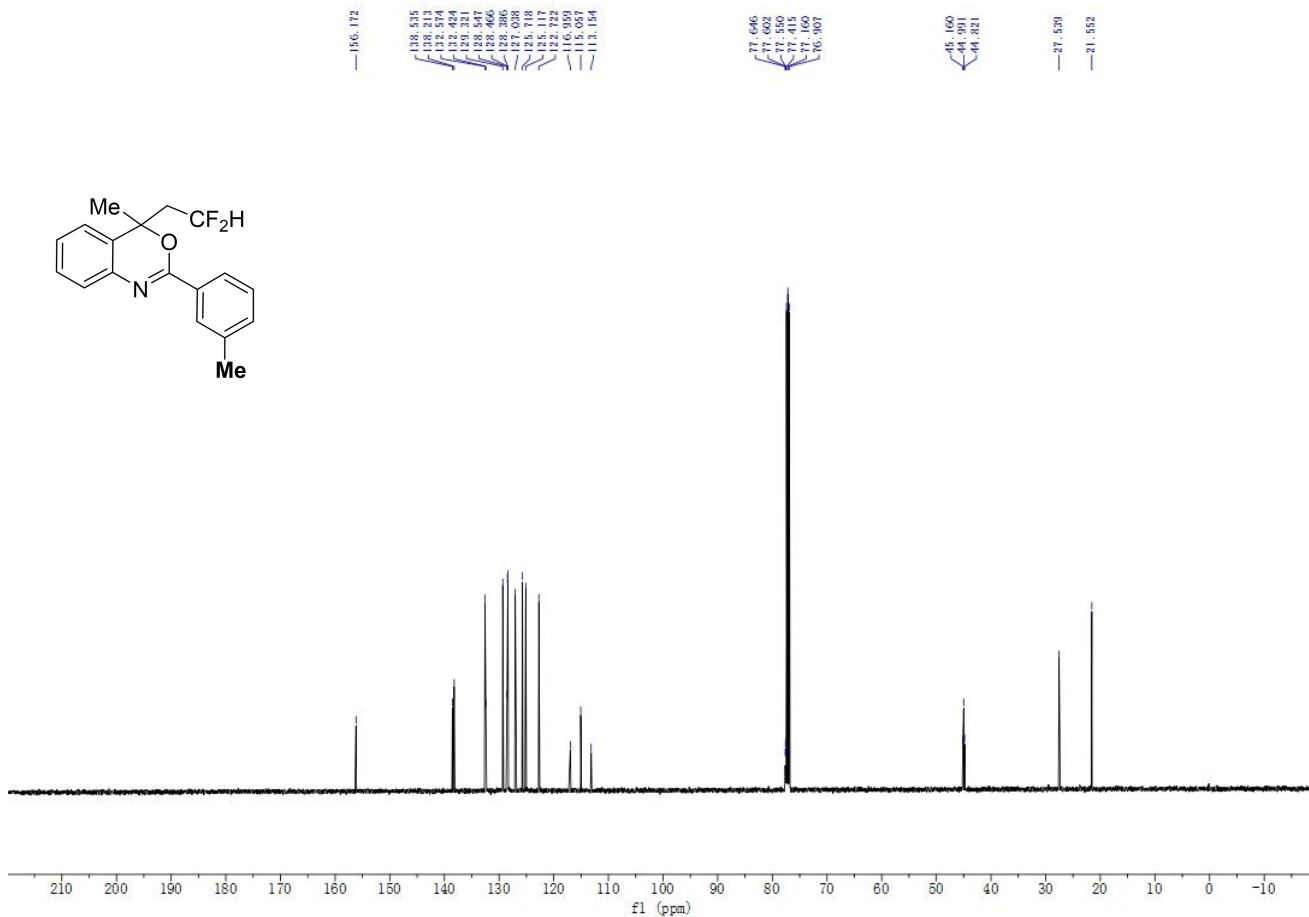



<sup>19</sup>F NMR Spectrum of **3qa**

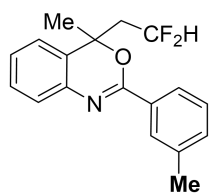

111.859  
111.880  
111.901  
111.922  
111.943  
111.964  
112.000  
112.020  
112.051  
112.077  
112.103  
112.129  
112.155  
112.181  
112.207  
112.233  
112.259  
112.285  
112.311  
112.337  
112.363  
112.389  
112.415  
112.441  
112.467  
112.493  
112.519  
112.545  
112.571  
112.597  
112.623  
112.649  
112.675  
112.701  
112.727  
112.753  
112.779  
112.805  
112.831  
112.857  
112.883  
112.909  
112.935  
112.961  
112.987  
113.013  
113.039  
113.065  
113.091  
113.117  
113.143  
113.169  
113.195  
113.221  
113.247  
113.273  
113.299  
113.325  
113.351  
113.377  
113.403  
113.429

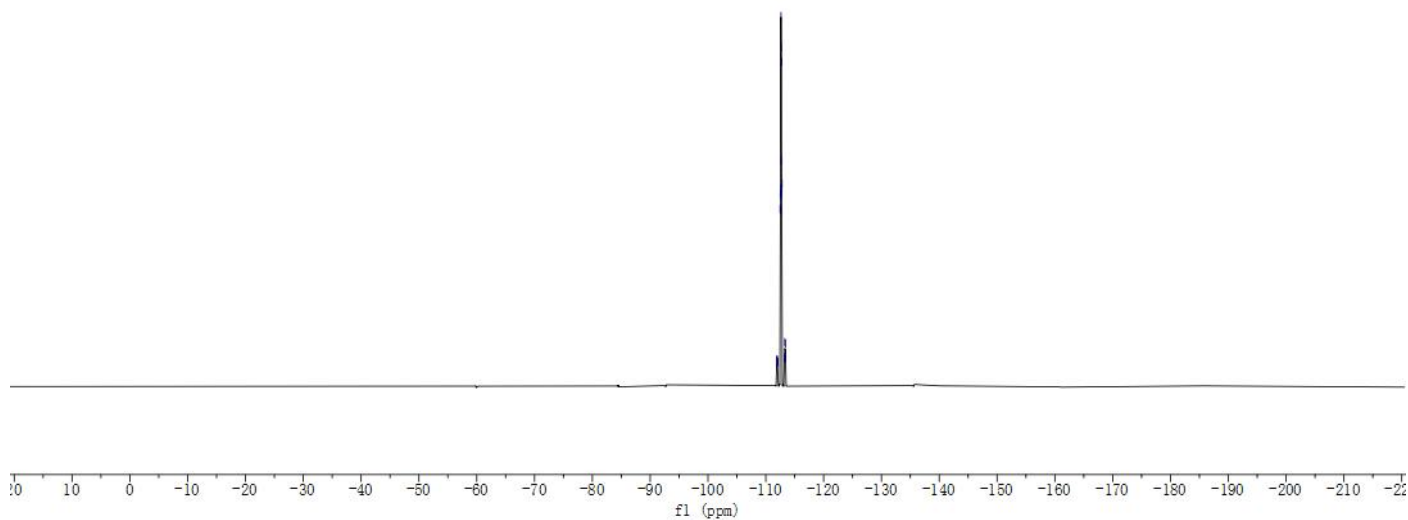

<sup>1</sup>H NMR Spectrum of **3ra**

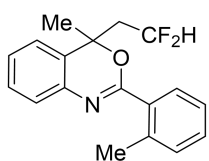

7.782  
7.763  
7.764  
7.765  
7.766  
7.767  
7.768  
7.769  
7.770  
7.771  
7.772  
7.773  
7.774  
7.775  
7.776  
7.777  
7.778  
7.779  
7.780  
7.781  
7.782  
7.783  
7.784  
7.785  
7.786  
7.787  
7.788  
7.789  
7.790  
7.791  
7.792  
7.793  
7.794  
7.795  
7.796  
7.797  
7.798  
7.799  
7.800  
7.801  
7.802  
7.803  
7.804  
7.805  
7.806  
7.807  
7.808  
7.809  
7.810  
7.811  
7.812  
7.813  
7.814  
7.815  
7.816  
7.817  
7.818  
7.819  
7.820  
7.821  
7.822  
7.823  
7.824  
7.825  
7.826  
7.827  
7.828  
7.829  
7.830  
7.831  
7.832  
7.833  
7.834  
7.835  
7.836  
7.837  
7.838  
7.839  
7.840  
7.841  
7.842  
7.843  
7.844  
7.845  
7.846  
7.847  
7.848  
7.849  
7.850  
7.851  
7.852  
7.853  
7.854  
7.855  
7.856  
7.857  
7.858  
7.859  
7.860  
7.861  
7.862  
7.863  
7.864  
7.865  
7.866  
7.867  
7.868  
7.869  
7.870  
7.871  
7.872  
7.873  
7.874  
7.875  
7.876  
7.877  
7.878  
7.879  
7.880  
7.881  
7.882  
7.883  
7.884  
7.885  
7.886  
7.887  
7.888  
7.889  
7.890  
7.891  
7.892  
7.893  
7.894  
7.895  
7.896  
7.897  
7.898  
7.899  
7.900  
7.901  
7.902  
7.903  
7.904  
7.905  
7.906  
7.907  
7.908  
7.909  
7.910  
7.911  
7.912  
7.913  
7.914  
7.915  
7.916  
7.917  
7.918  
7.919  
7.920  
7.921  
7.922  
7.923  
7.924  
7.925  
7.926  
7.927  
7.928  
7.929  
7.930  
7.931  
7.932  
7.933  
7.934  
7.935  
7.936  
7.937  
7.938  
7.939  
7.940  
7.941  
7.942  
7.943  
7.944  
7.945  
7.946  
7.947  
7.948  
7.949  
7.950  
7.951  
7.952  
7.953  
7.954  
7.955  
7.956  
7.957  
7.958  
7.959  
7.960  
7.961  
7.962  
7.963  
7.964  
7.965  
7.966  
7.967  
7.968  
7.969  
7.970  
7.971  
7.972  
7.973  
7.974  
7.975  
7.976  
7.977  
7.978  
7.979  
7.980  
7.981  
7.982  
7.983  
7.984  
7.985  
7.986  
7.987  
7.988  
7.989  
7.990  
7.991  
7.992  
7.993  
7.994  
7.995  
7.996  
7.997  
7.998  
7.999  
8.000

2.652  
2.654  
2.656  
2.658  
2.660  
2.662  
2.664  
2.666  
2.668  
2.670  
2.672  
2.674  
2.676  
2.678  
2.680  
2.682  
2.684  
2.686  
2.688  
2.690  
2.692  
2.694  
2.696  
2.698  
2.700  
2.702  
2.704  
2.706  
2.708  
2.710  
2.712  
2.714  
2.716  
2.718  
2.720  
2.722  
2.724  
2.726  
2.728  
2.730  
2.732  
2.734  
2.736  
2.738  
2.740  
2.742  
2.744  
2.746  
2.748  
2.750  
2.752  
2.754  
2.756  
2.758  
2.760  
2.762  
2.764  
2.766  
2.768  
2.770  
2.772  
2.774  
2.776  
2.778  
2.780  
2.782  
2.784  
2.786  
2.788  
2.790  
2.792  
2.794  
2.796  
2.798  
2.800

1.790

0.000

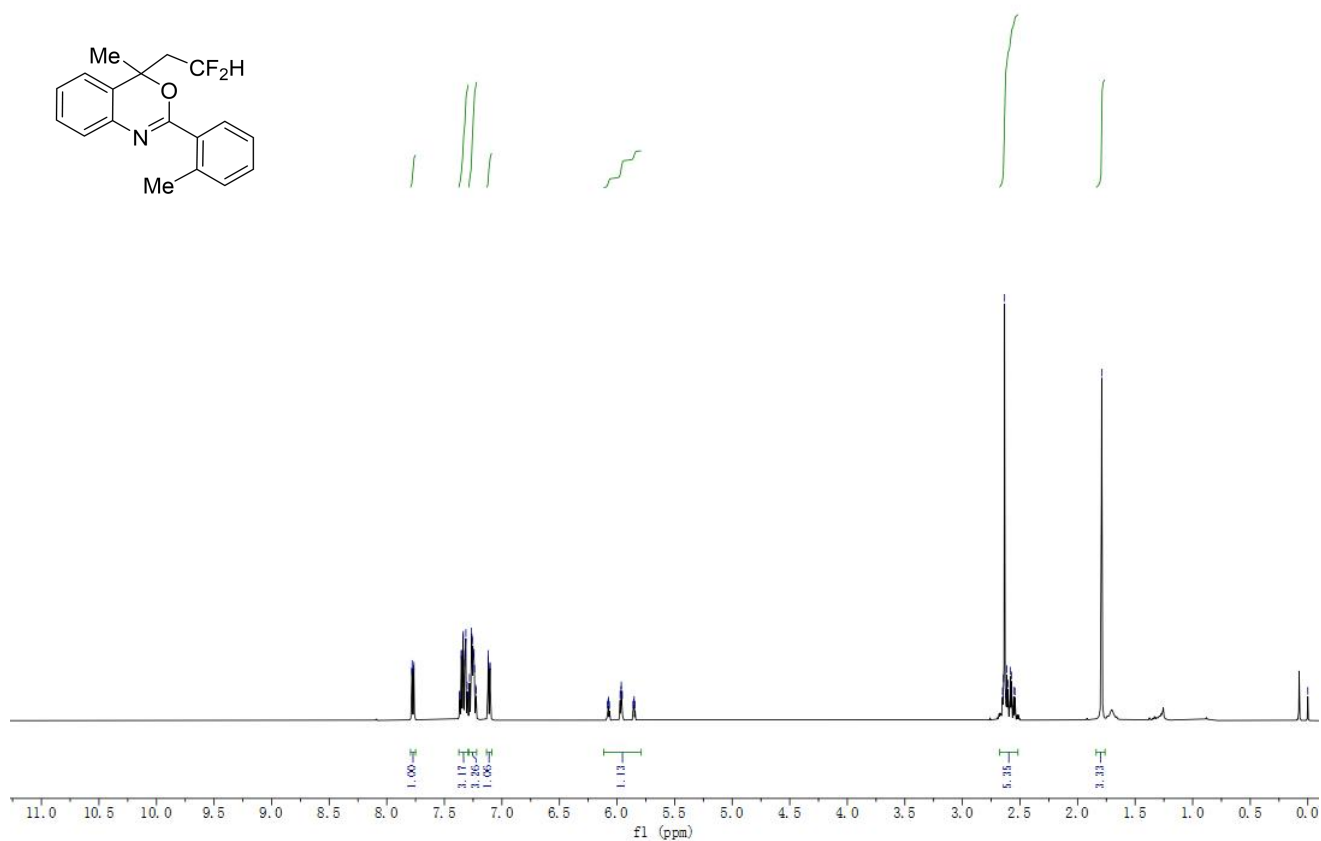

### <sup>13</sup>C NMR Spectrum of **3ra**

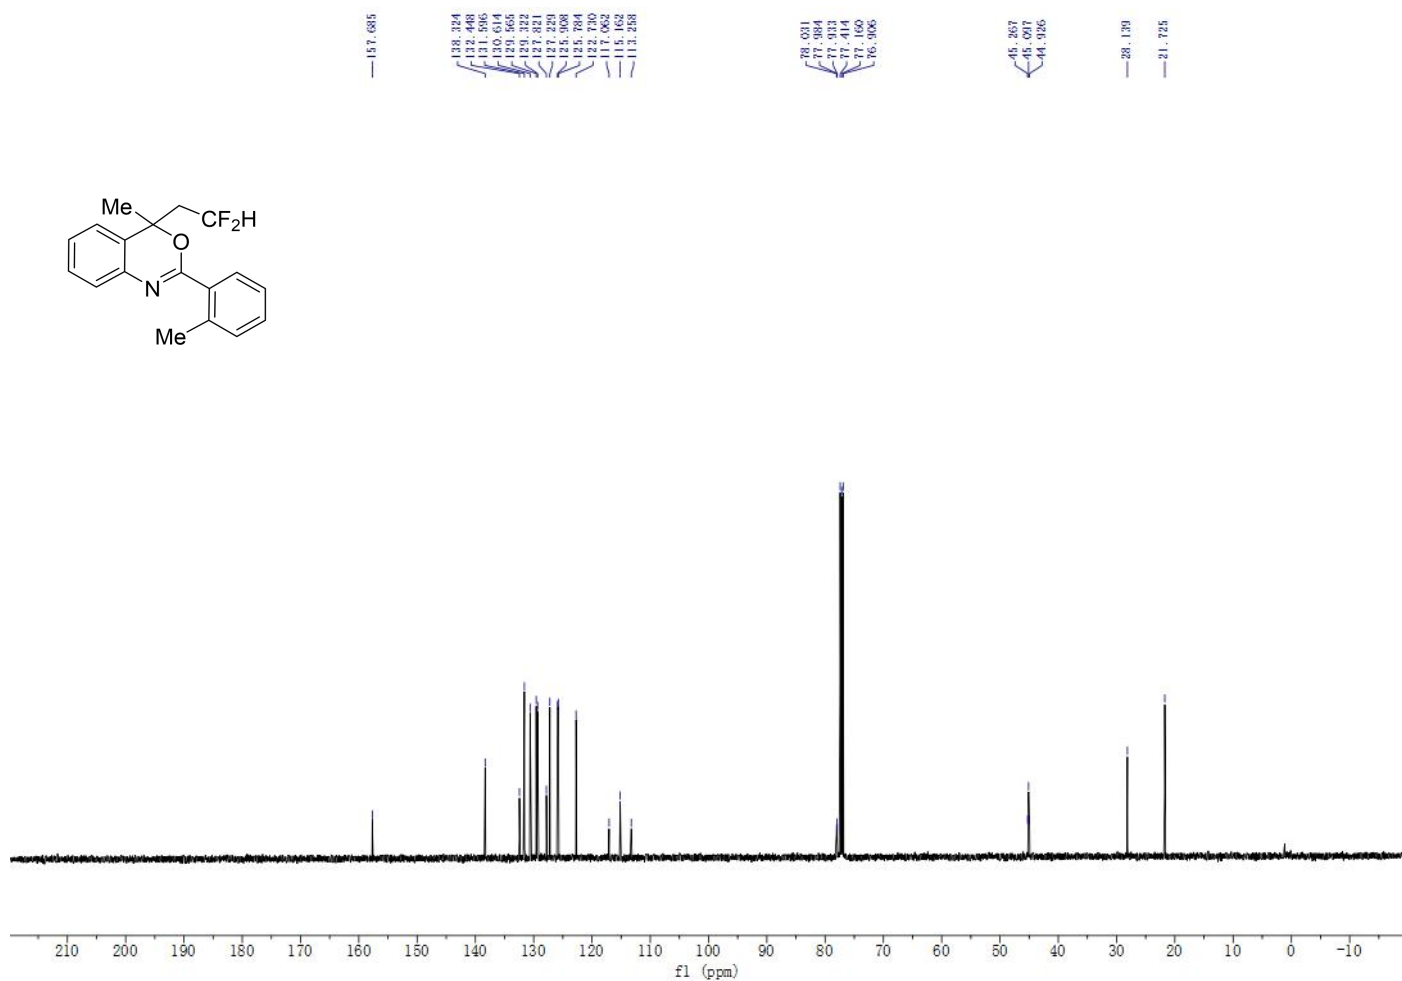

### <sup>19</sup>F NMR Spectrum of **3ra**

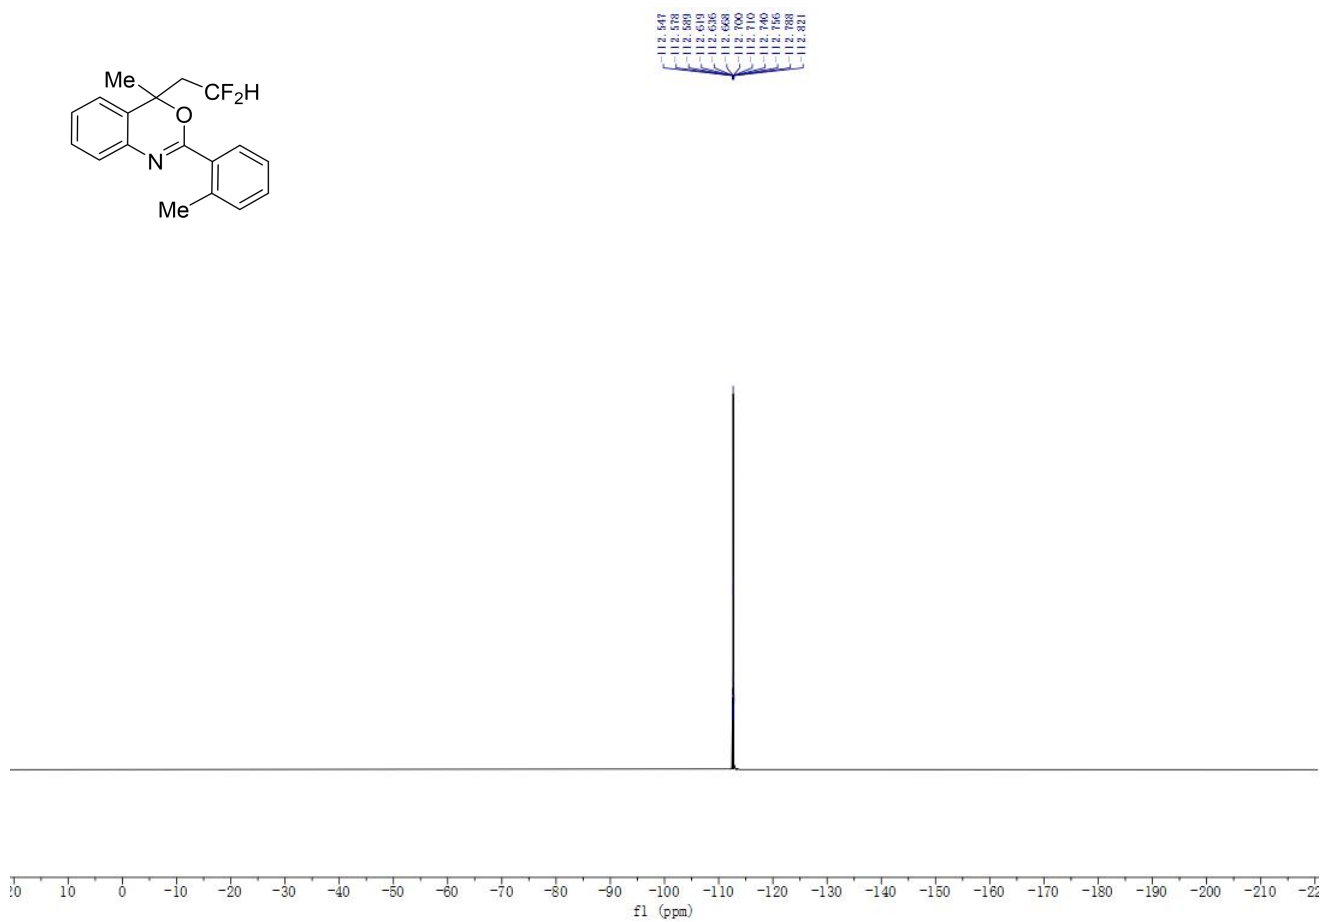

<sup>1</sup>H NMR Spectrum of **3sa**

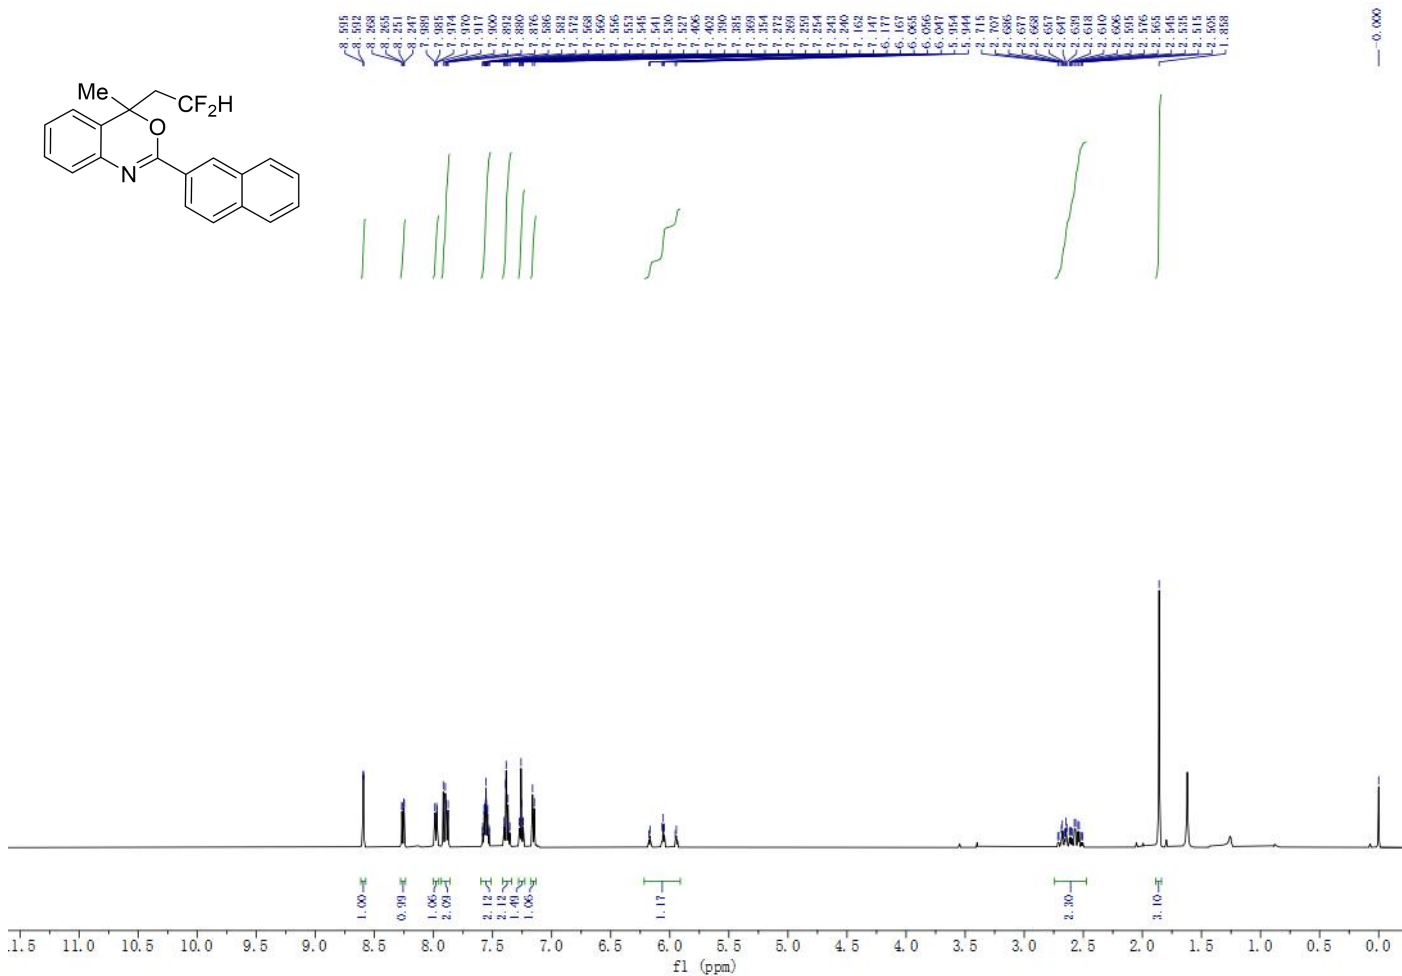

<sup>13</sup>C NMR Spectrum of **3sa**

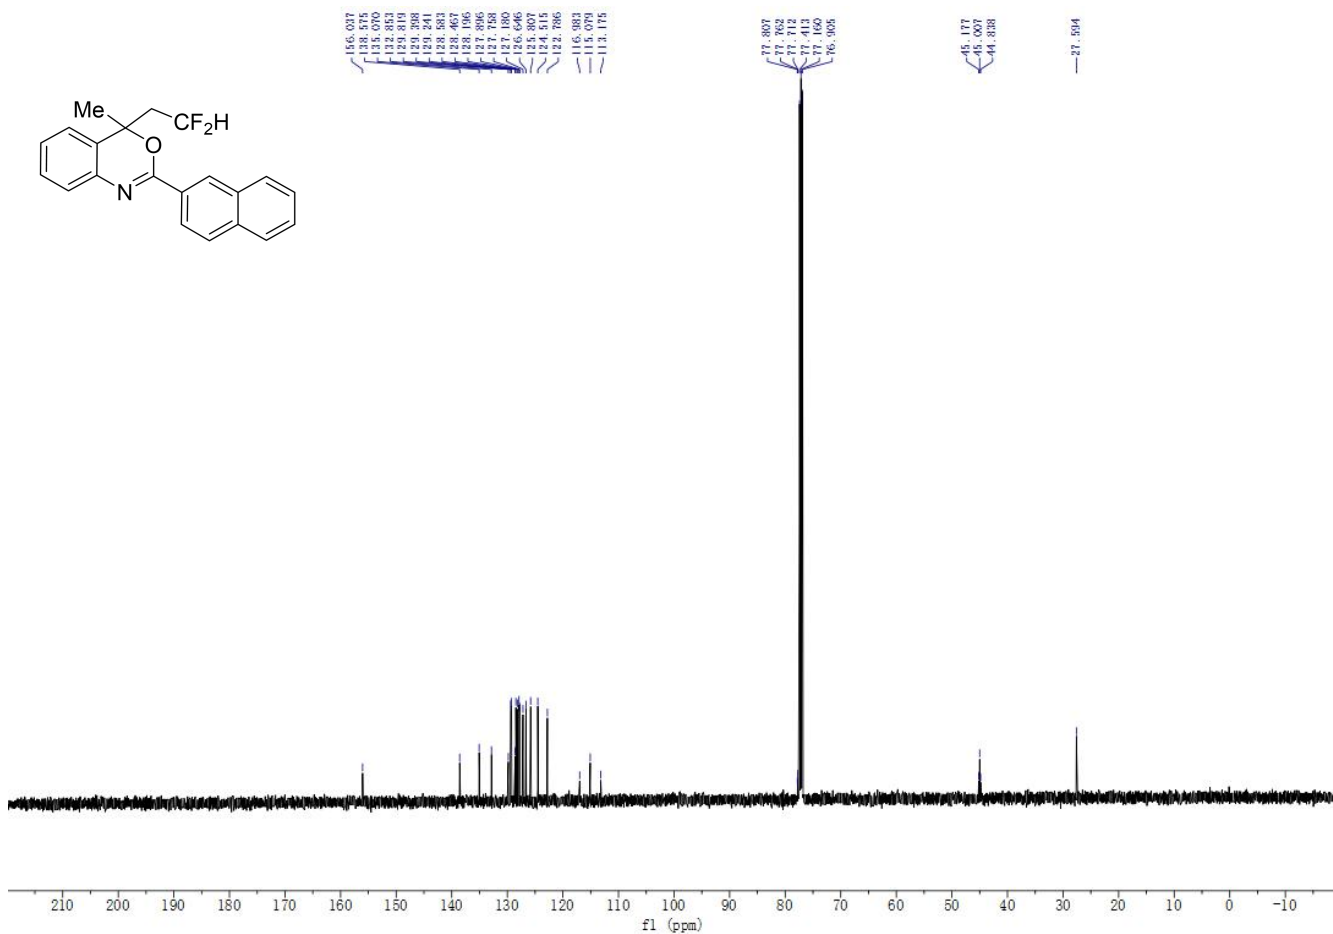

<sup>19</sup>F NMR Spectrum of **3sa**

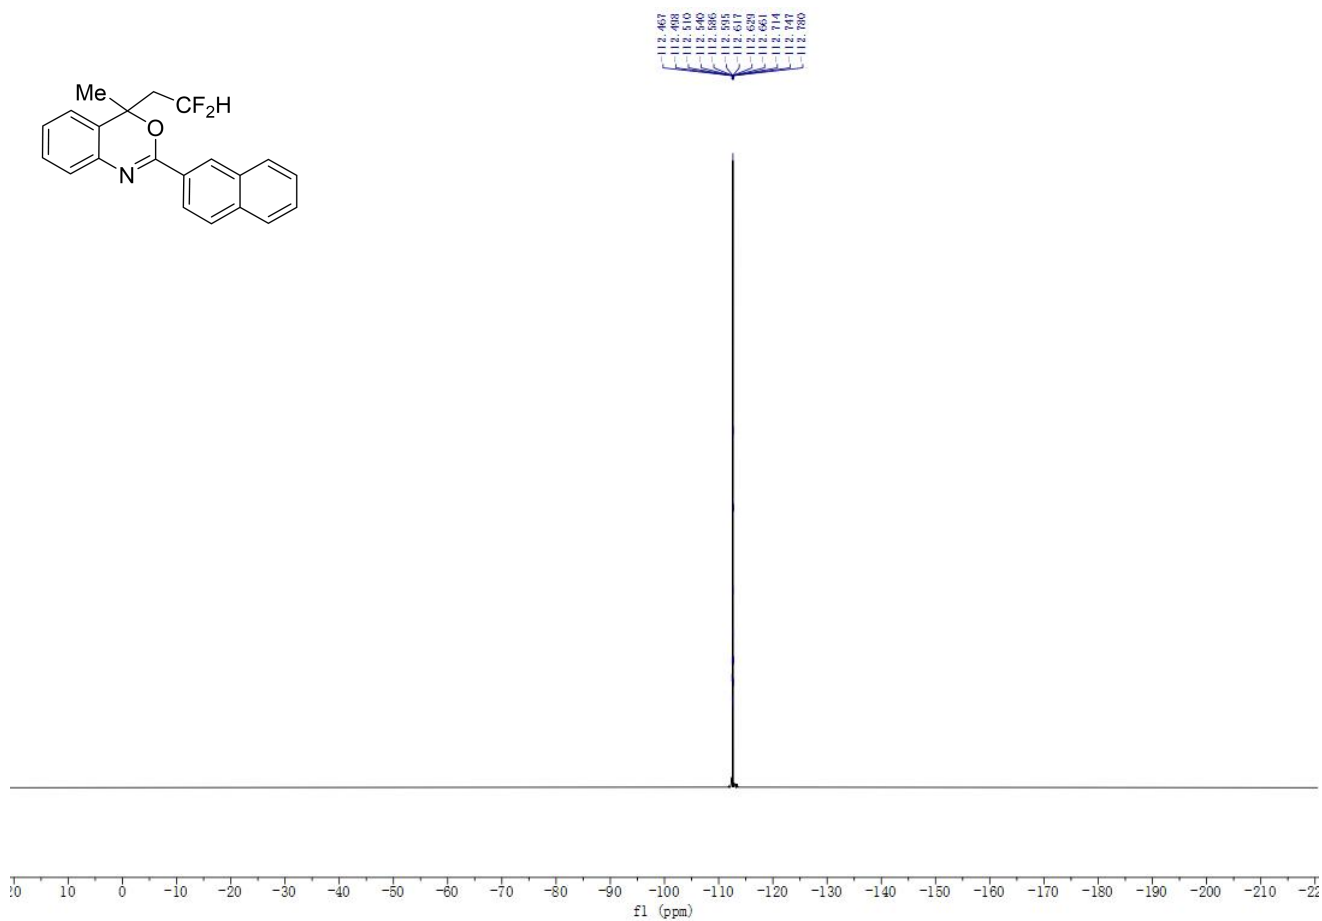

<sup>1</sup>H NMR Spectrum of **3ta**

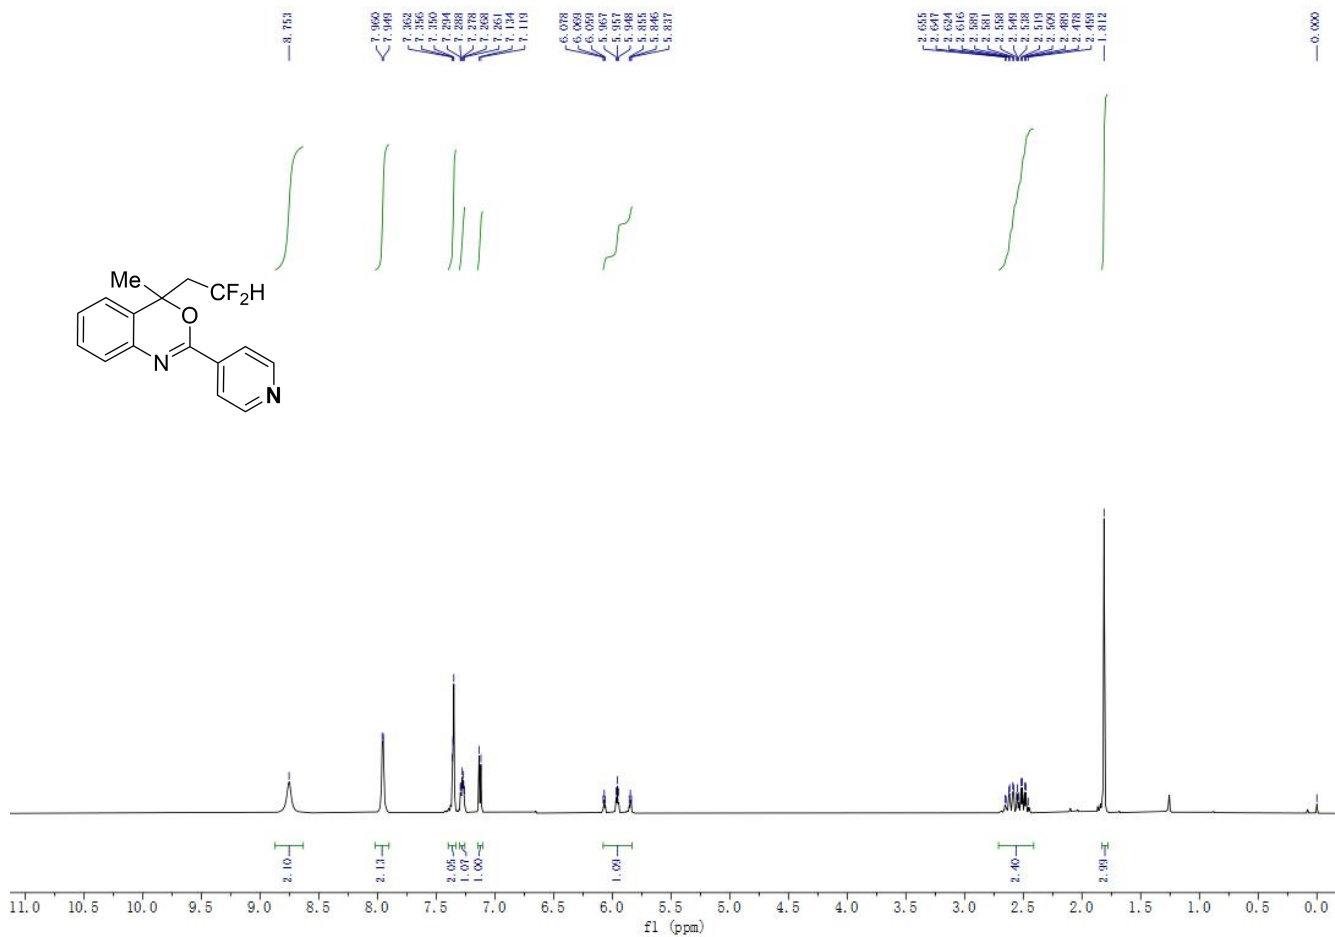

### <sup>13</sup>C NMR Spectrum of 3ta

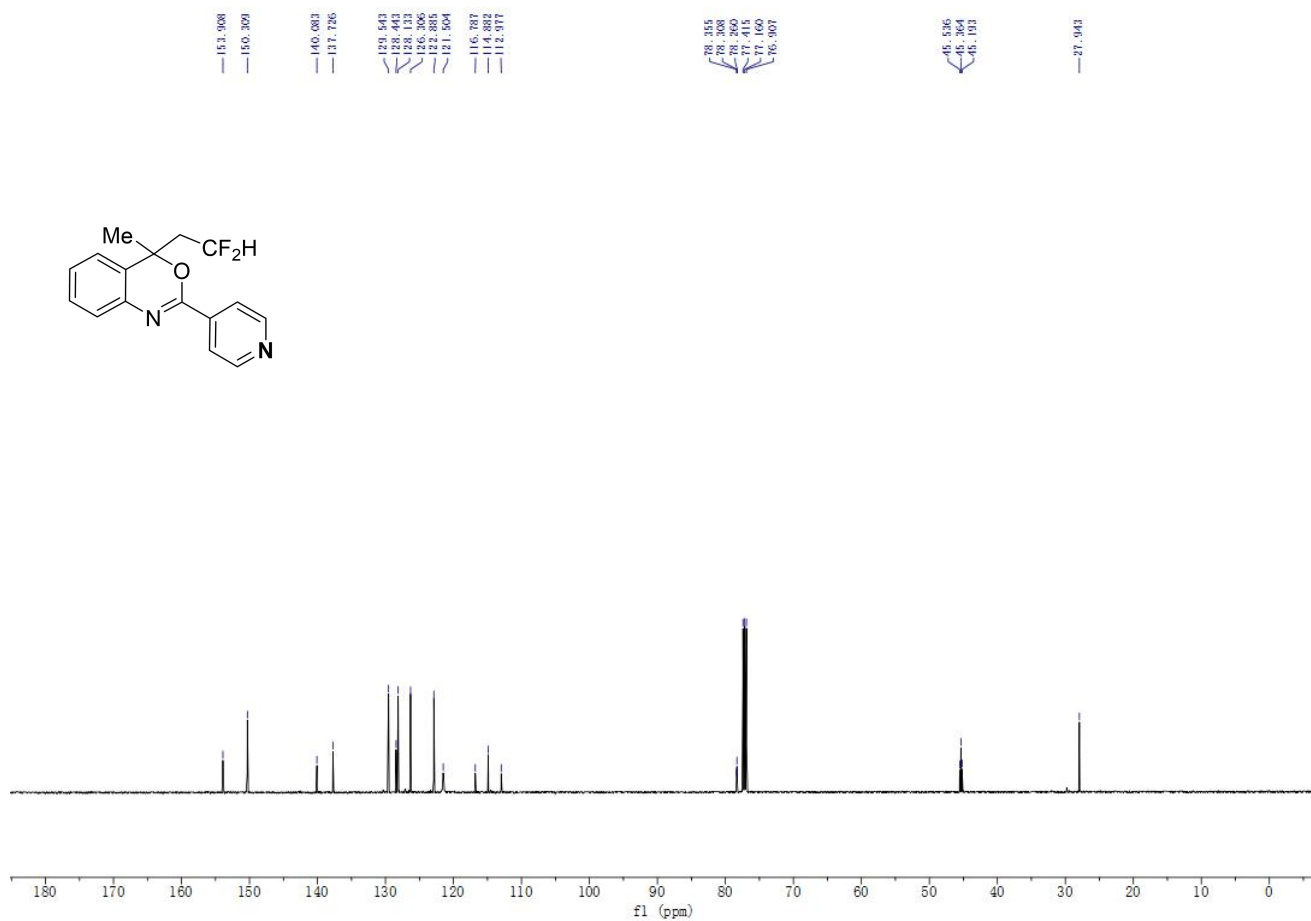

### <sup>19</sup>F NMR Spectrum of 3ta

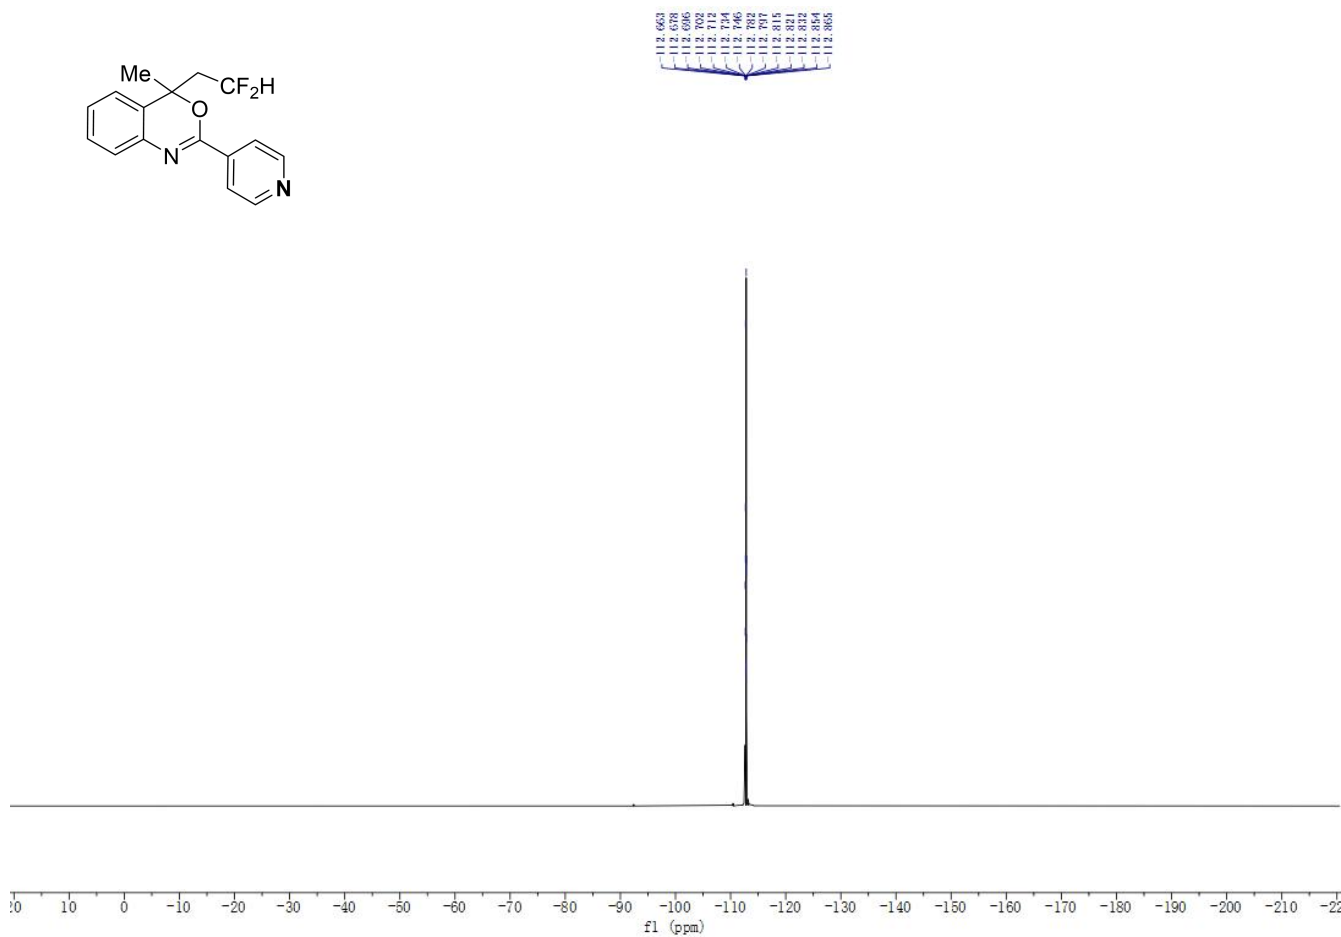

<sup>1</sup>H NMR Spectrum of **3ua**

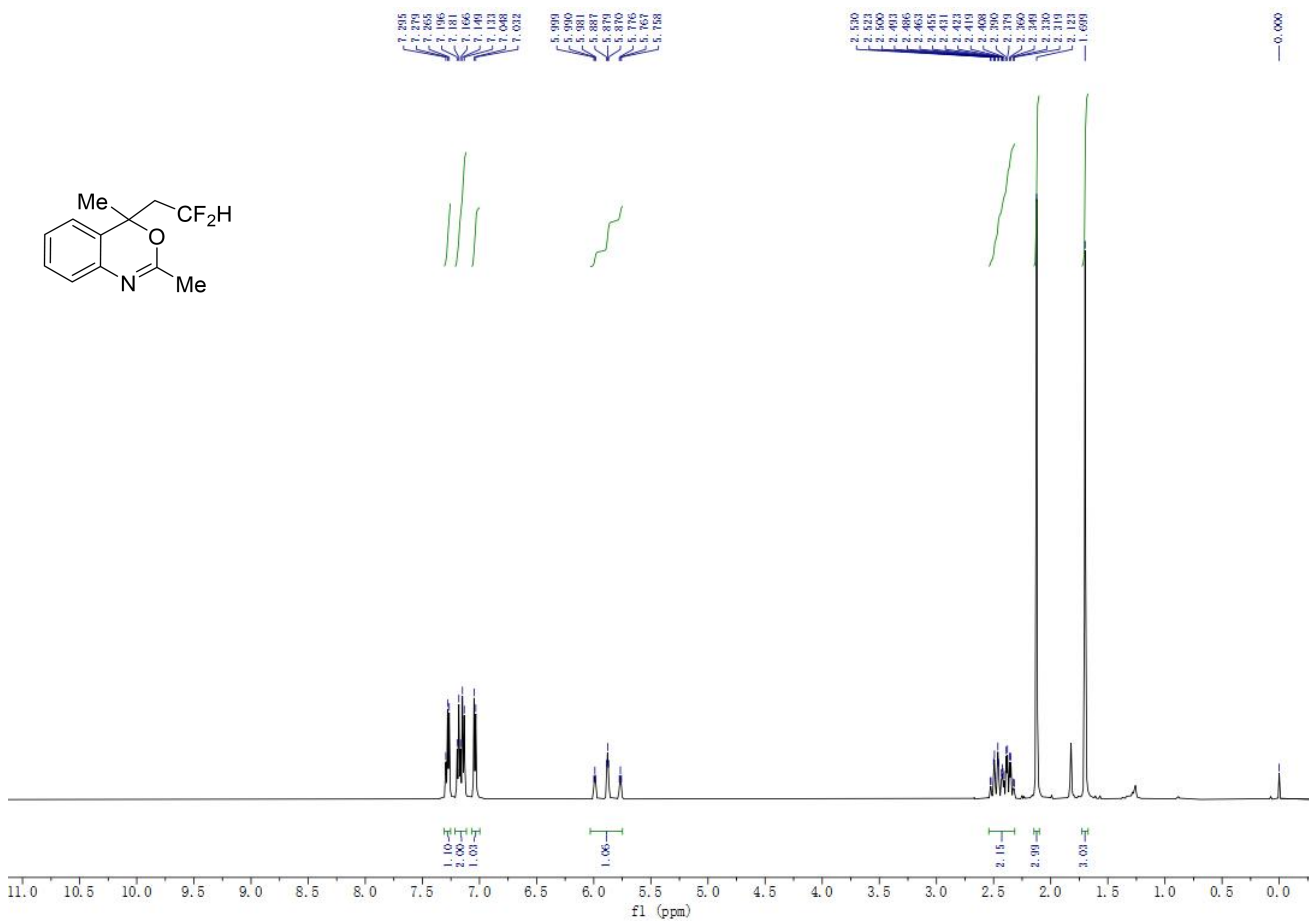

<sup>13</sup>C NMR Spectrum of **3ua**

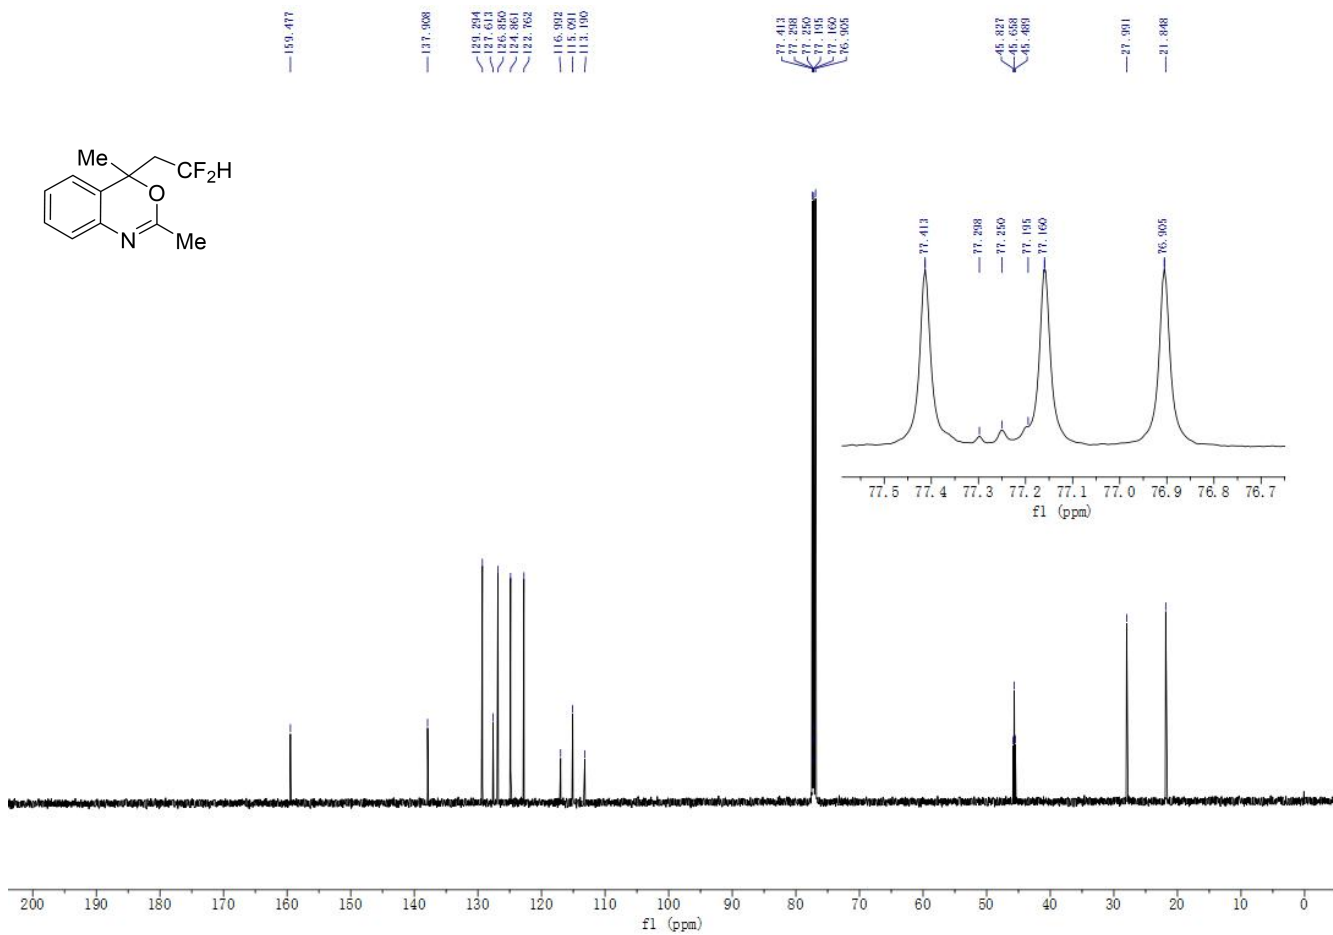

# $^{19}\text{F}$ NMR Spectrum of **3ua**

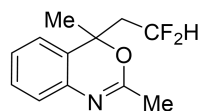

112.655  
112.684  
112.711  
113.330

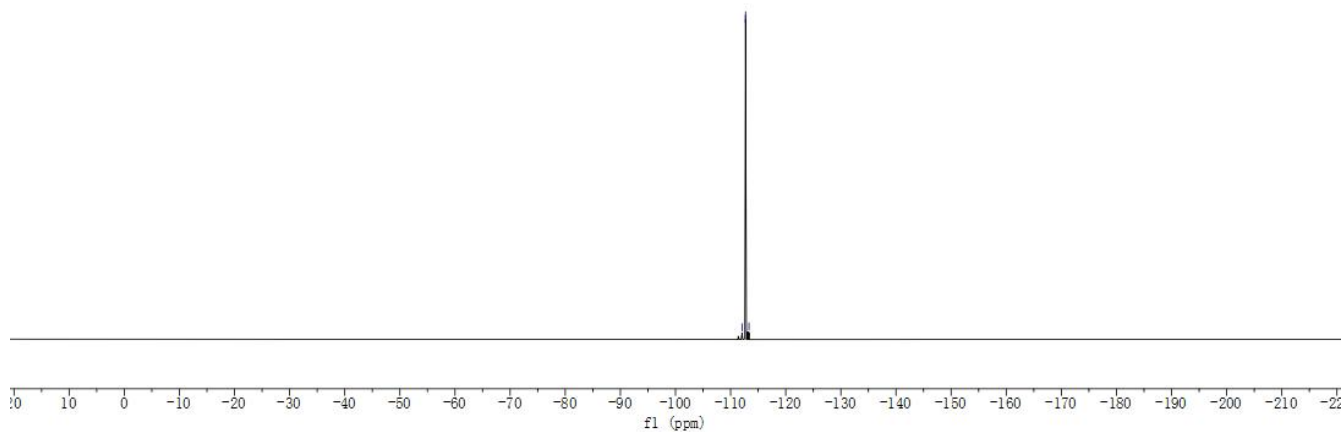

# $^1\text{H}$ NMR Spectrum of **3va**

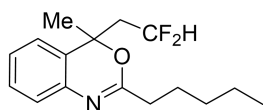

7.297  
7.278  
7.258  
7.261  
7.192  
7.167  
7.162  
7.152  
7.044  
7.021  
5.015  
4.938  
4.927  
5.907  
5.903  
5.896  
5.891  
5.885  
5.884  
5.784  
5.771

2.555  
2.547  
2.542  
2.517  
2.507  
2.496  
2.489  
2.483  
2.456  
2.447  
2.435  
2.417  
2.395  
2.382  
2.376  
2.350  
2.346  
2.329  
2.320  
1.951  
1.952  
1.701  
1.687  
1.675  
1.738  
1.730  
1.365  
1.356  
1.349  
0.322  
0.314  
0.303  
0.296  
0.296

-0.000

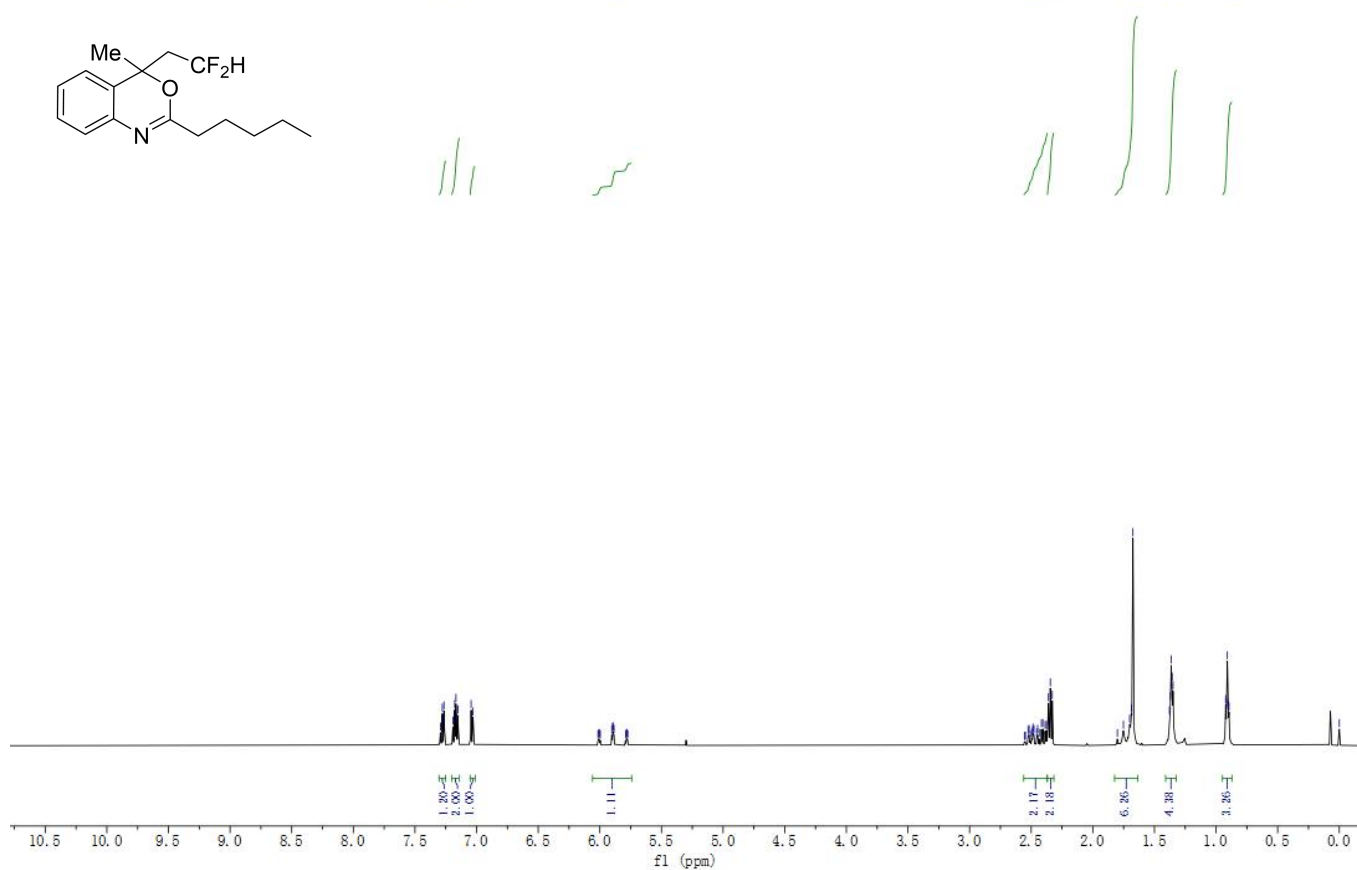

### <sup>13</sup>C NMR Spectrum of 3va

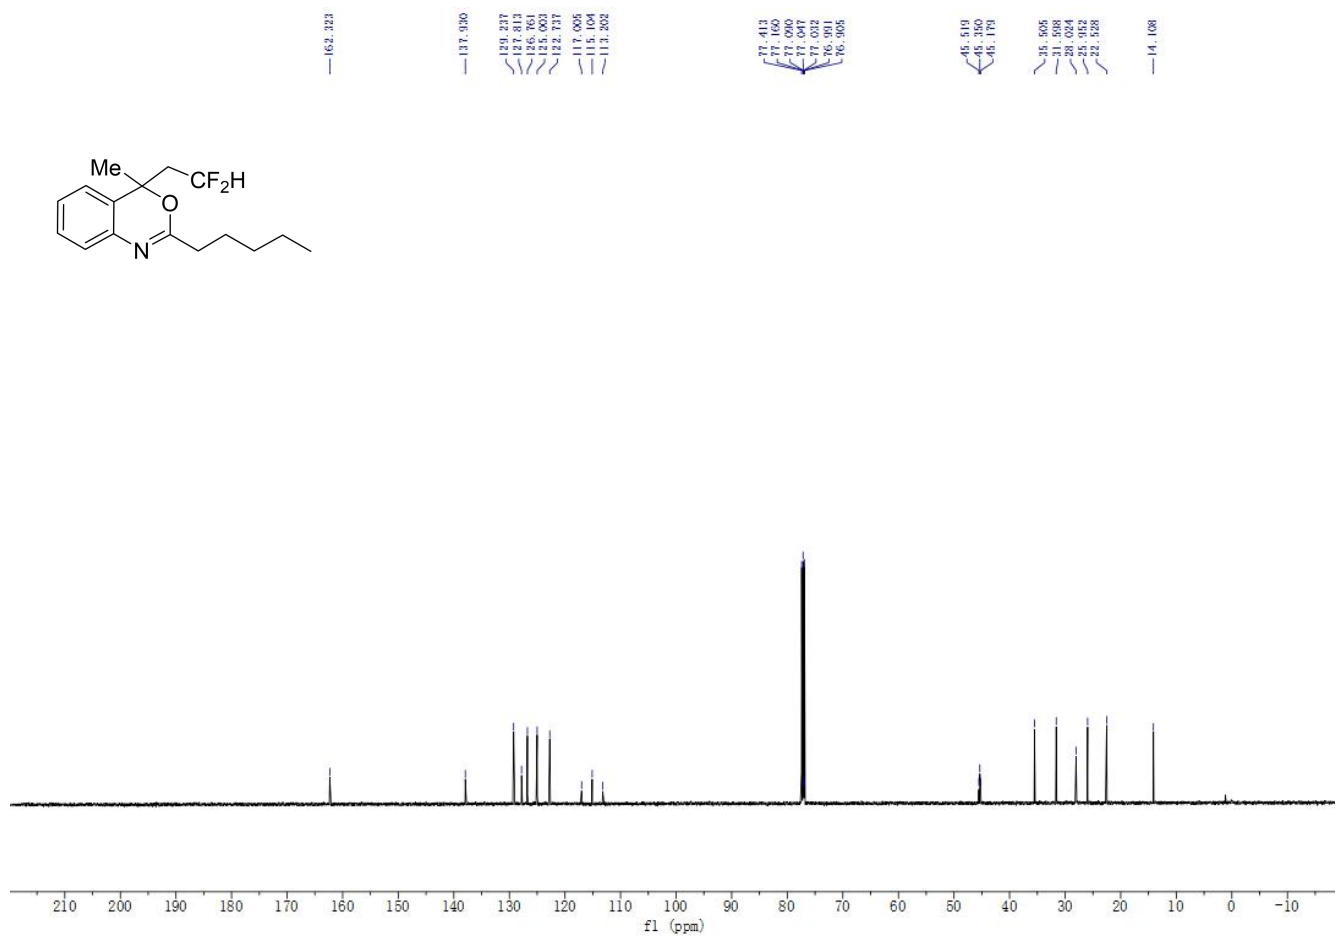

### <sup>19</sup>F NMR Spectrum of 3va

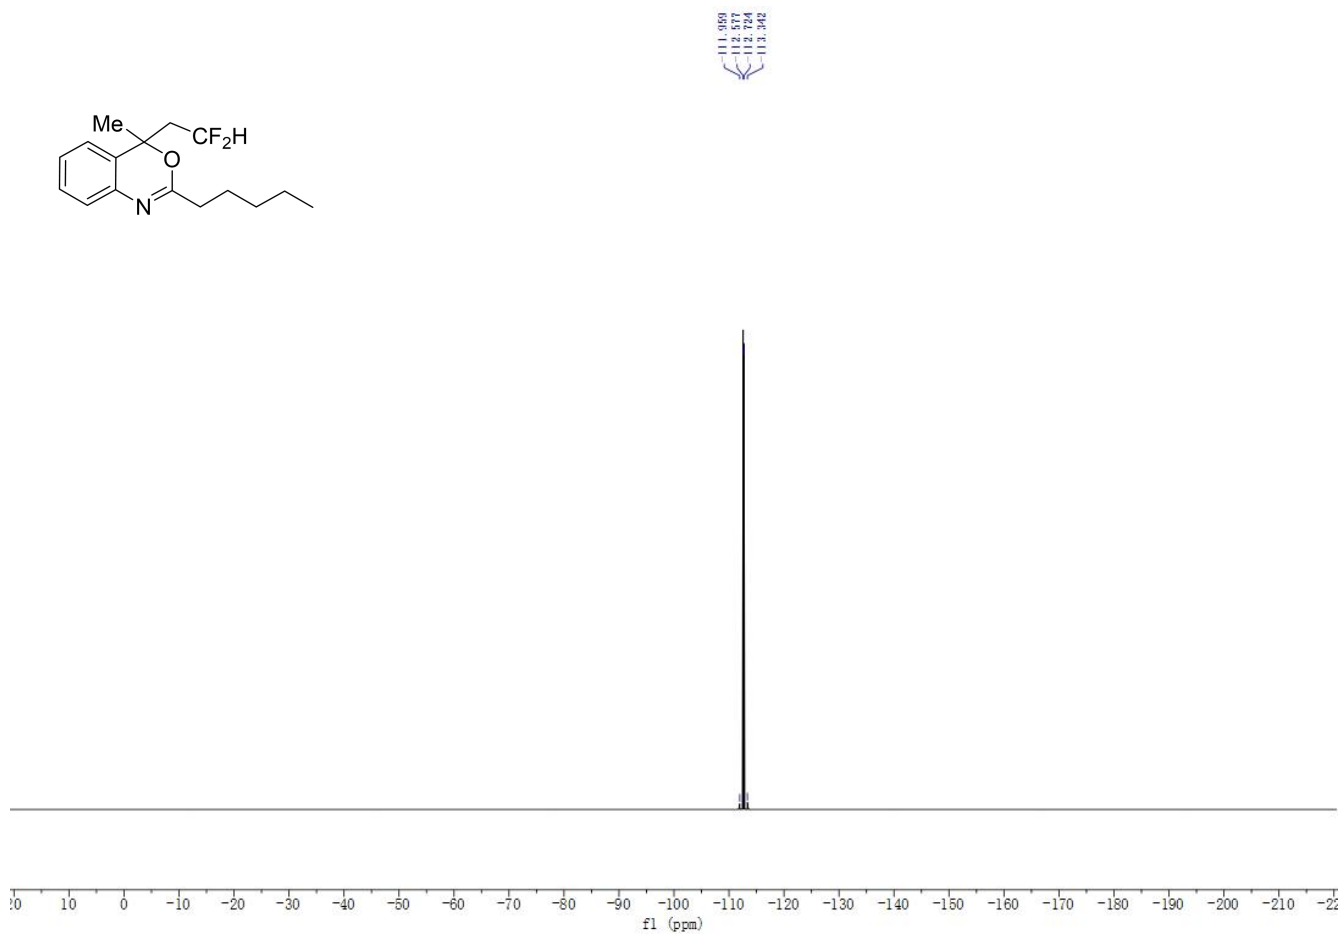



<sup>1</sup>H NMR Spectrum of **3wa**

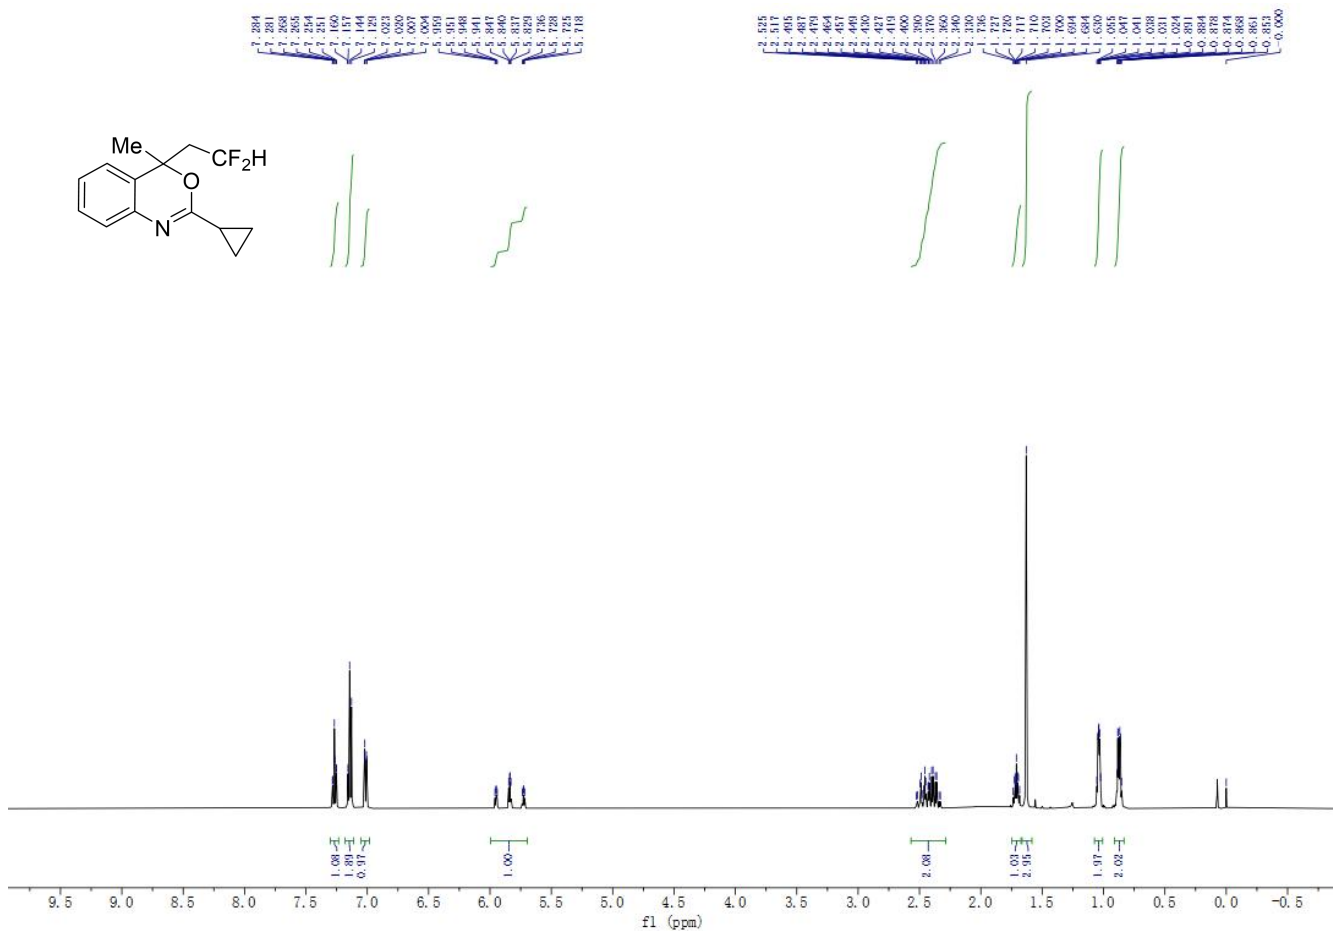

<sup>13</sup>C NMR Spectrum of **3wa**

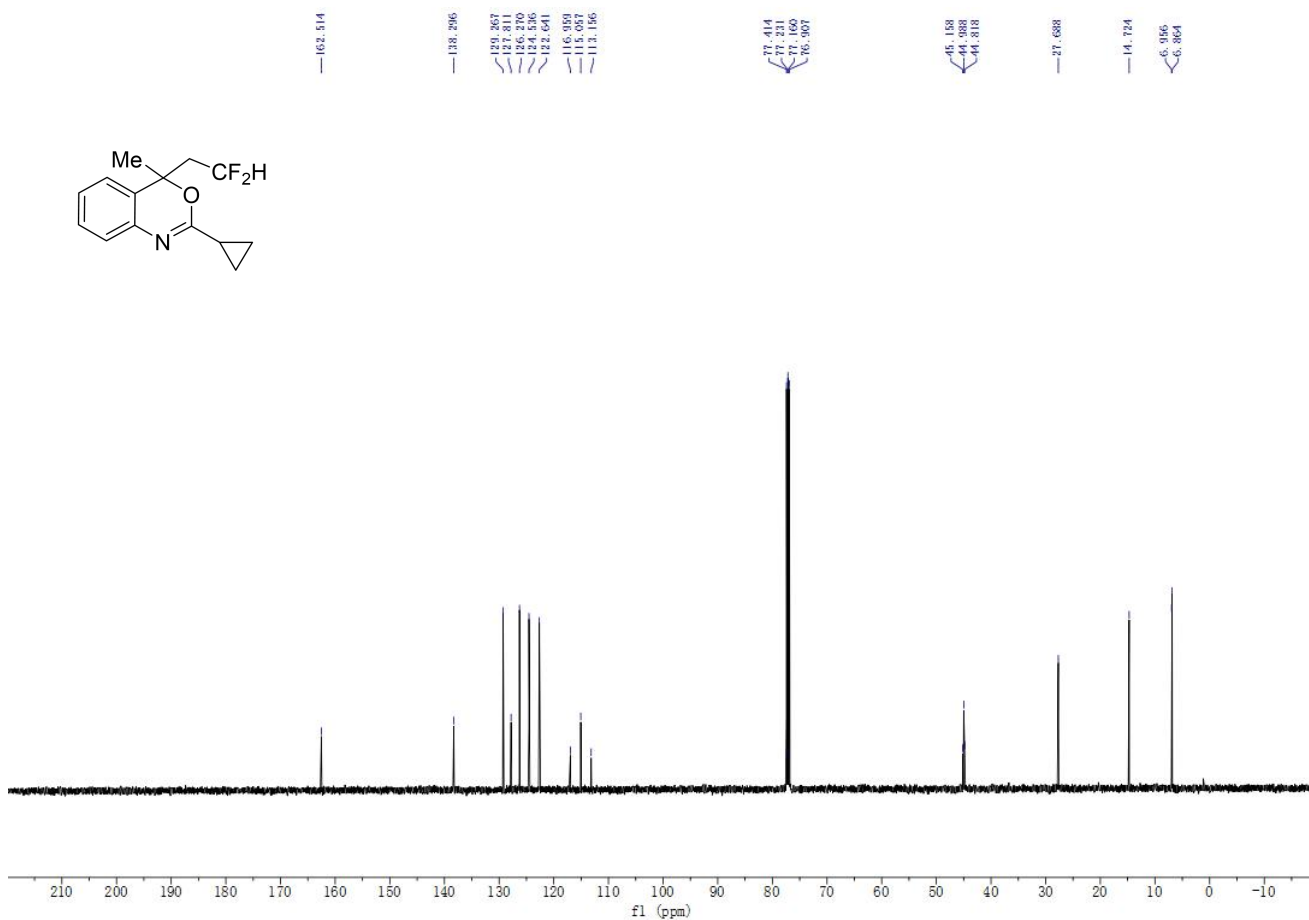

<sup>19</sup>F NMR Spectrum of **3wa**

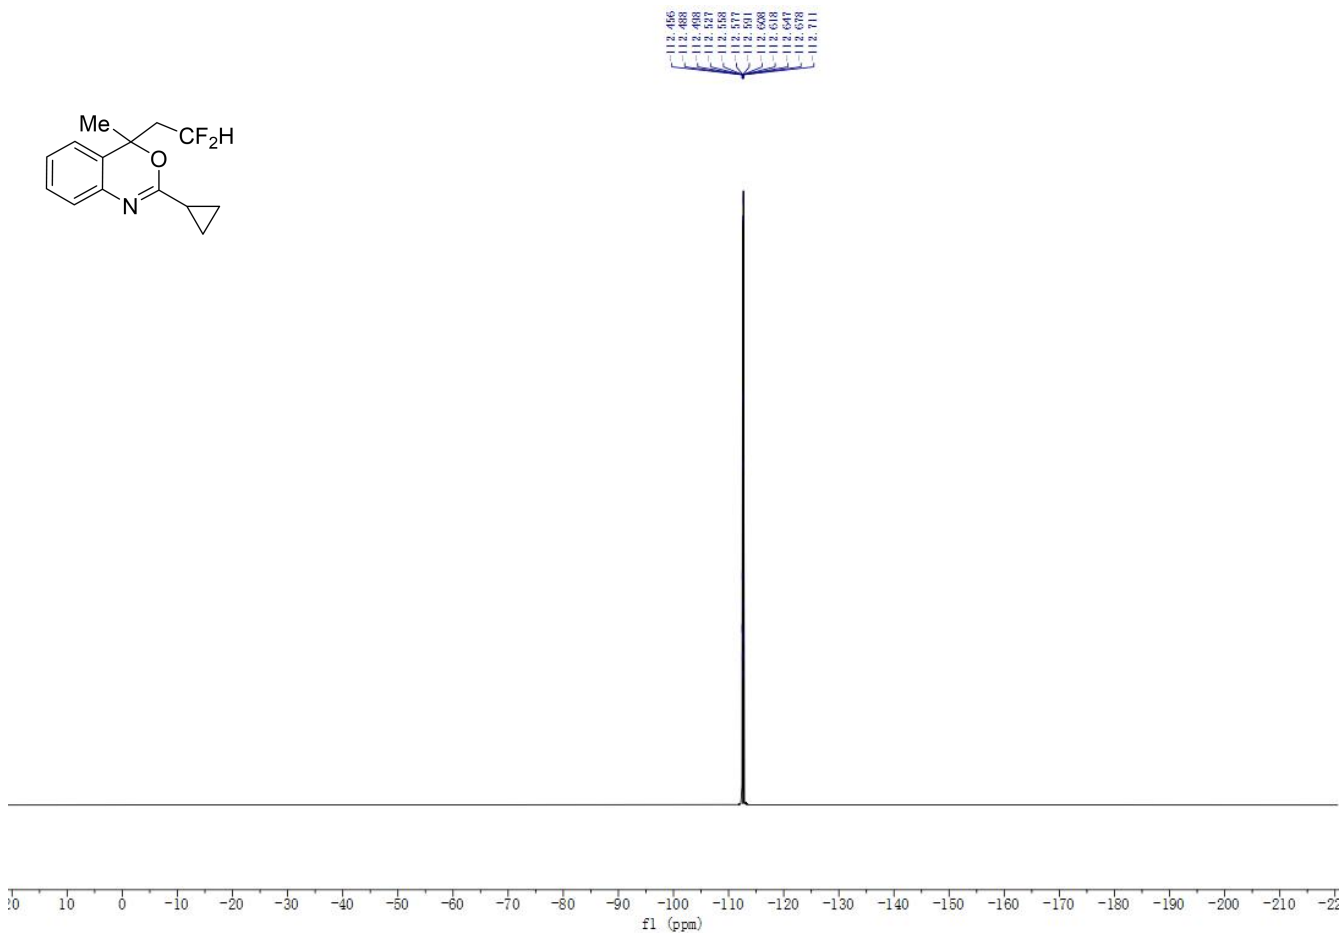

<sup>1</sup>H NMR Spectrum of **3xa**

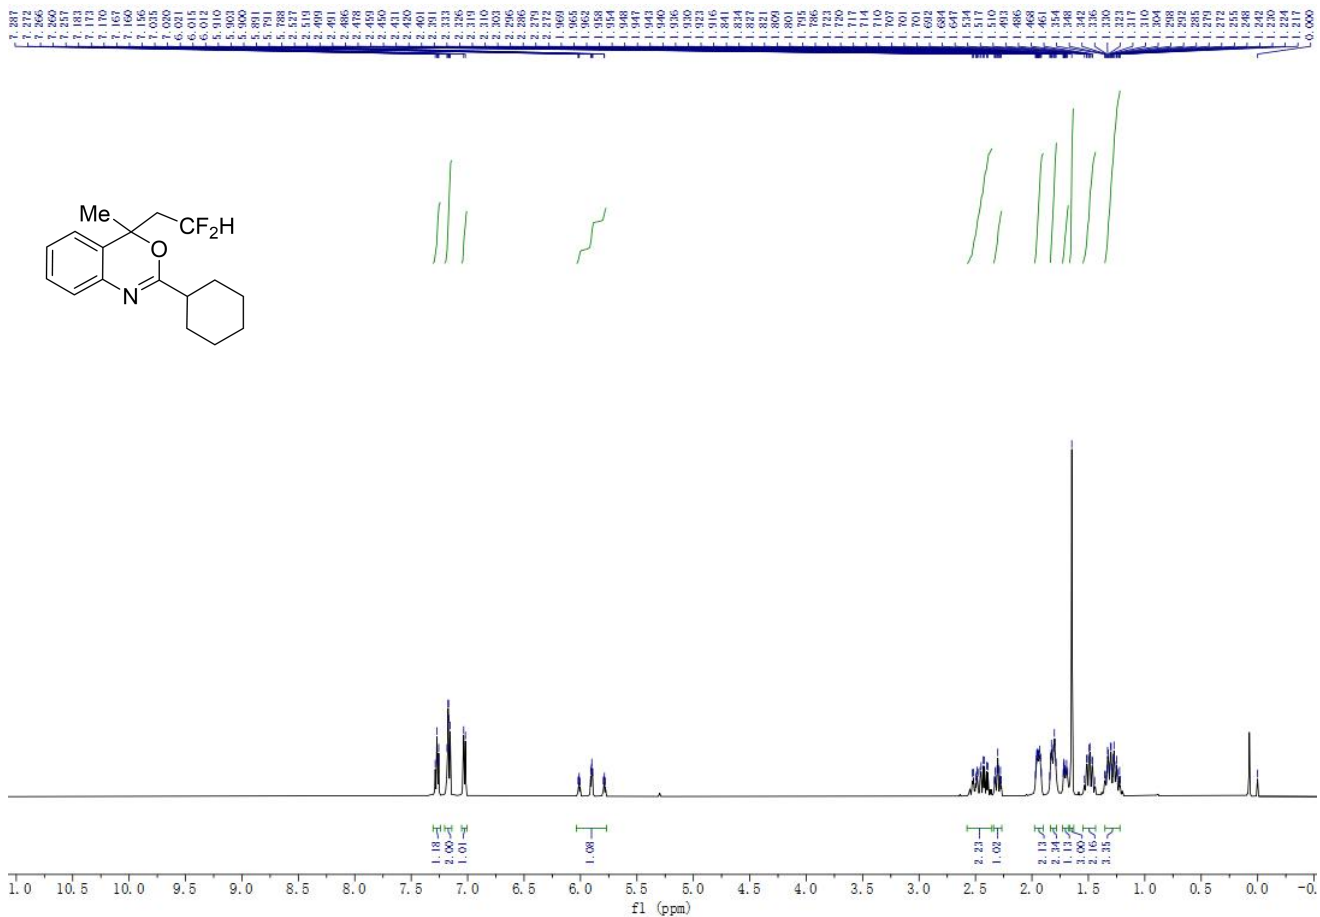

### <sup>13</sup>C NMR Spectrum of 3xa

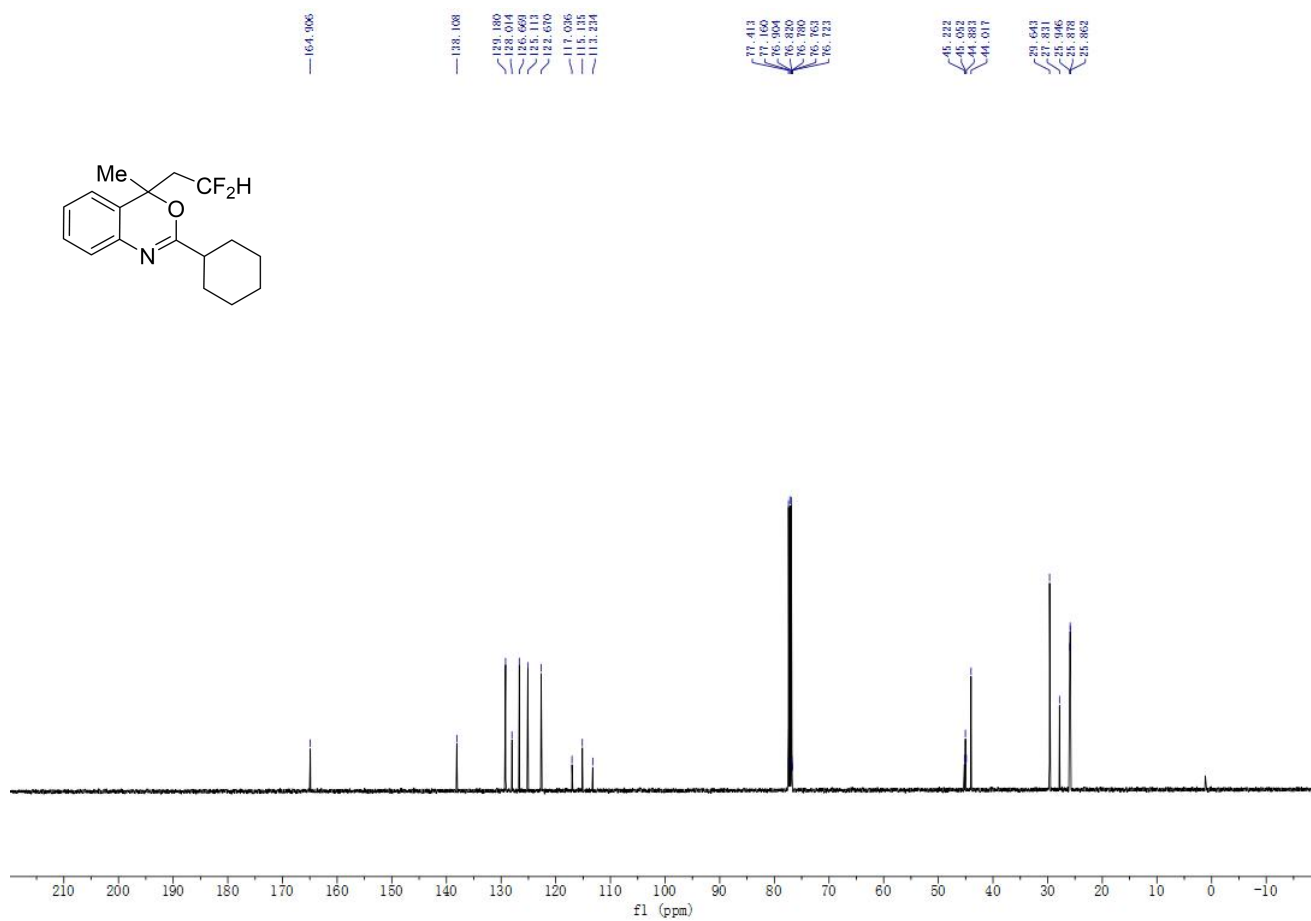

### <sup>19</sup>F NMR Spectrum of 3xa

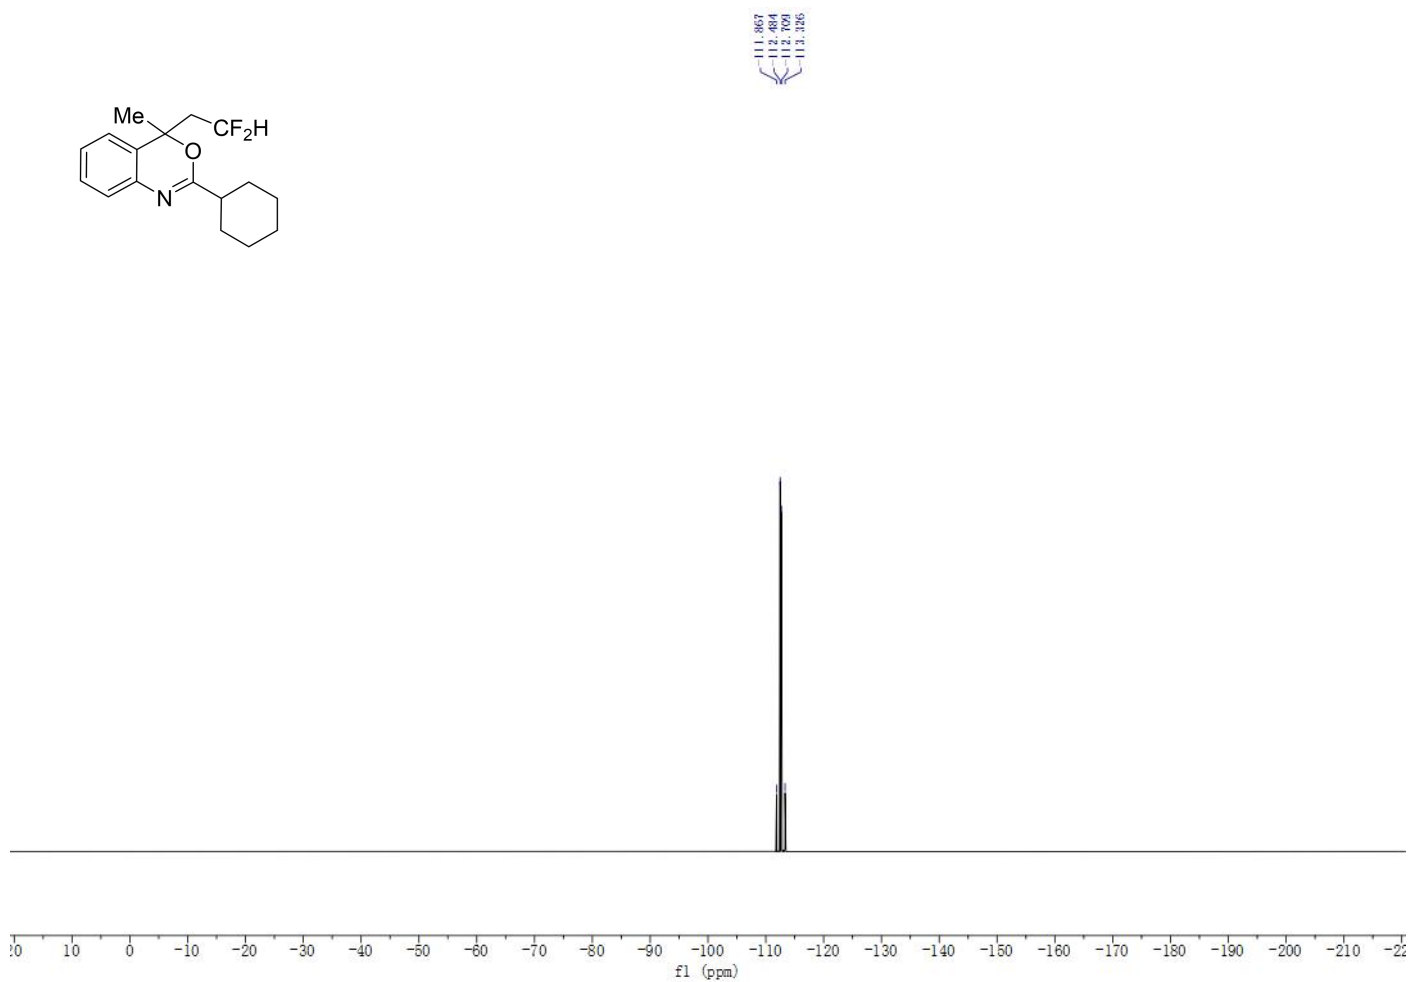

<sup>1</sup>H NMR Spectrum of 3ya

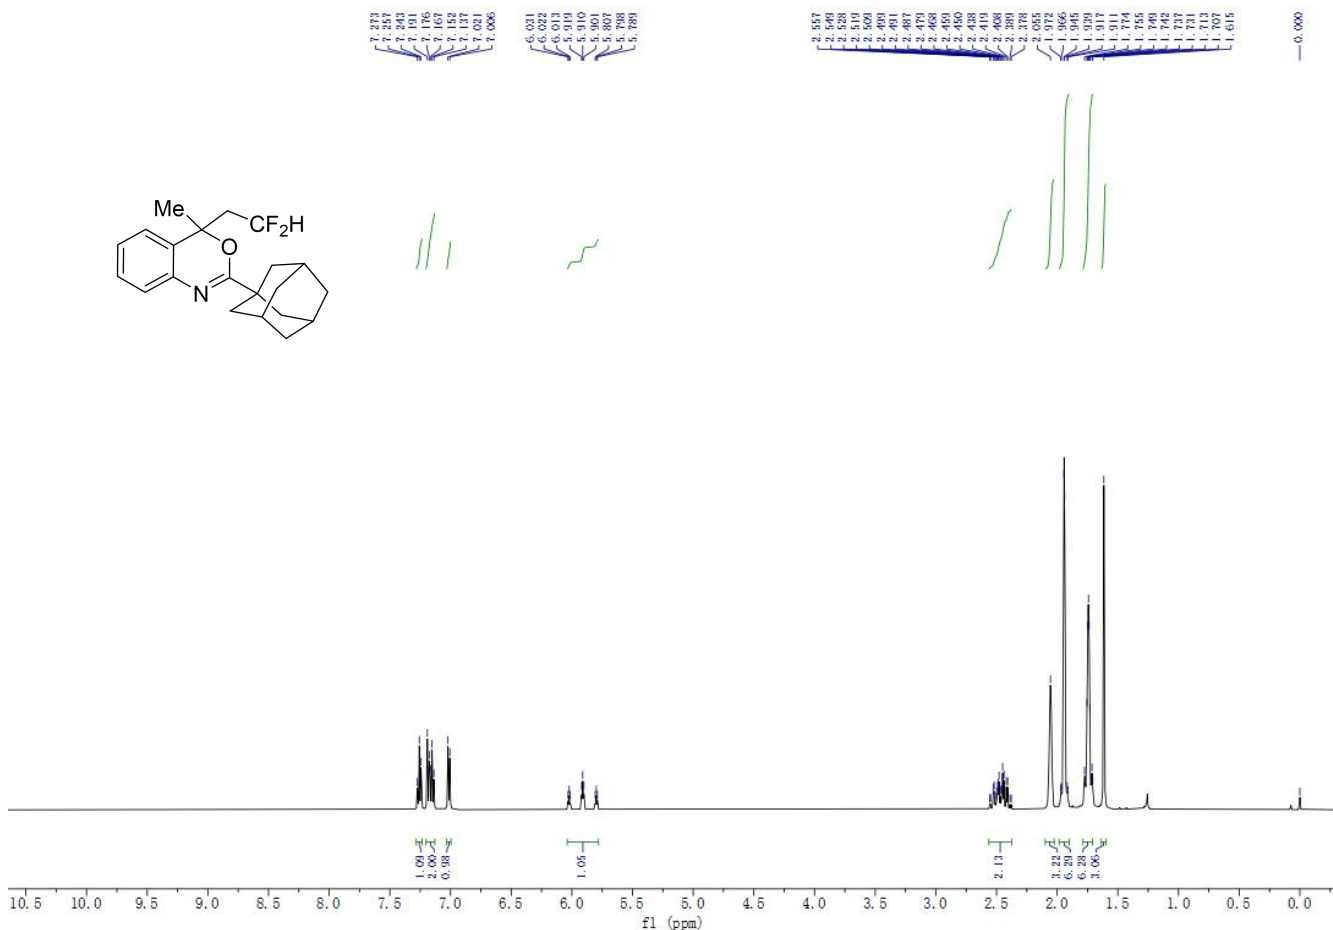

<sup>13</sup>C NMR Spectrum of 3ya

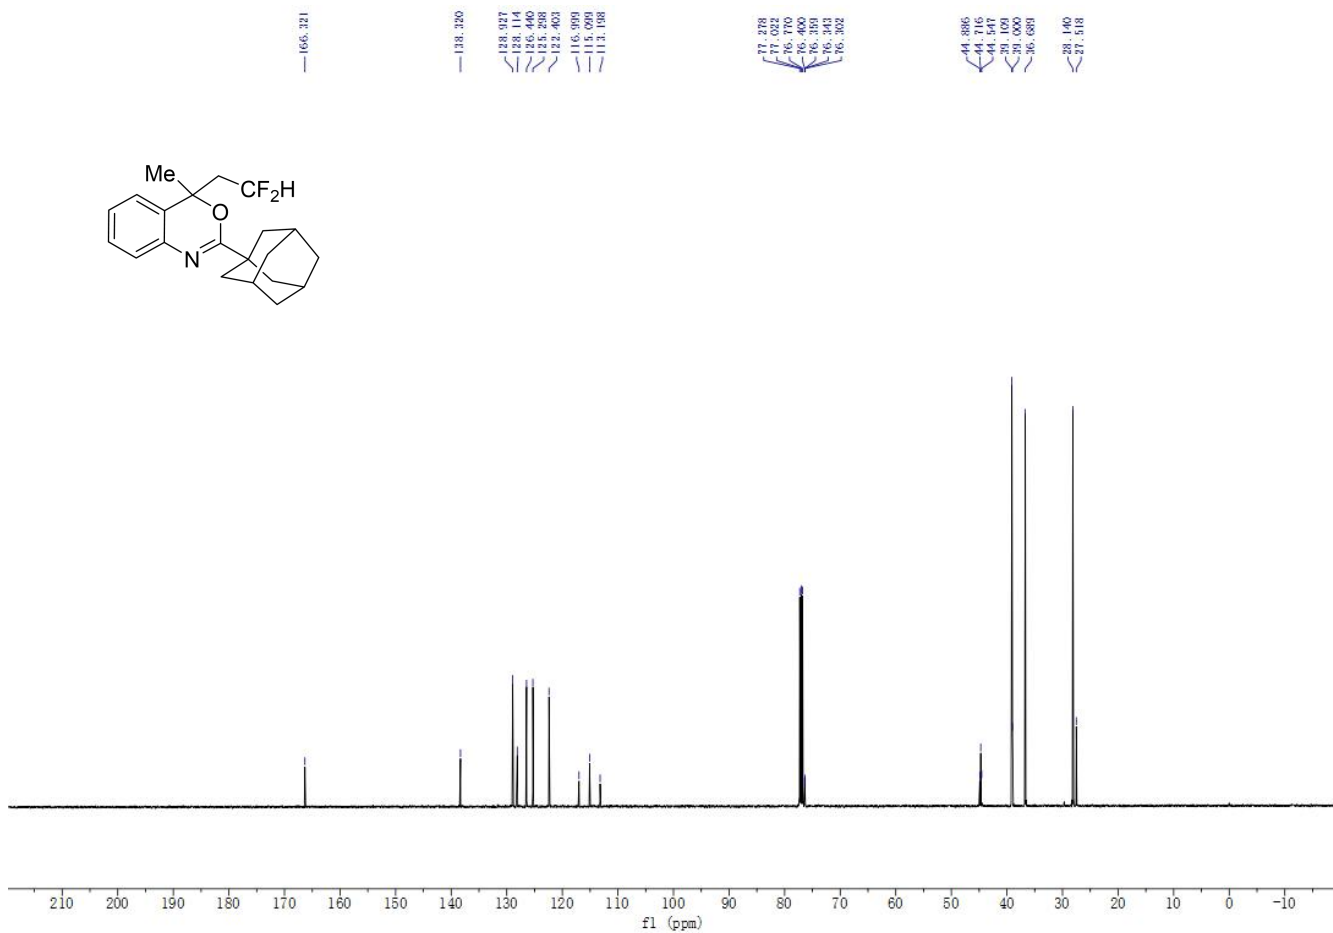

<sup>19</sup>F NMR Spectrum of 3ya

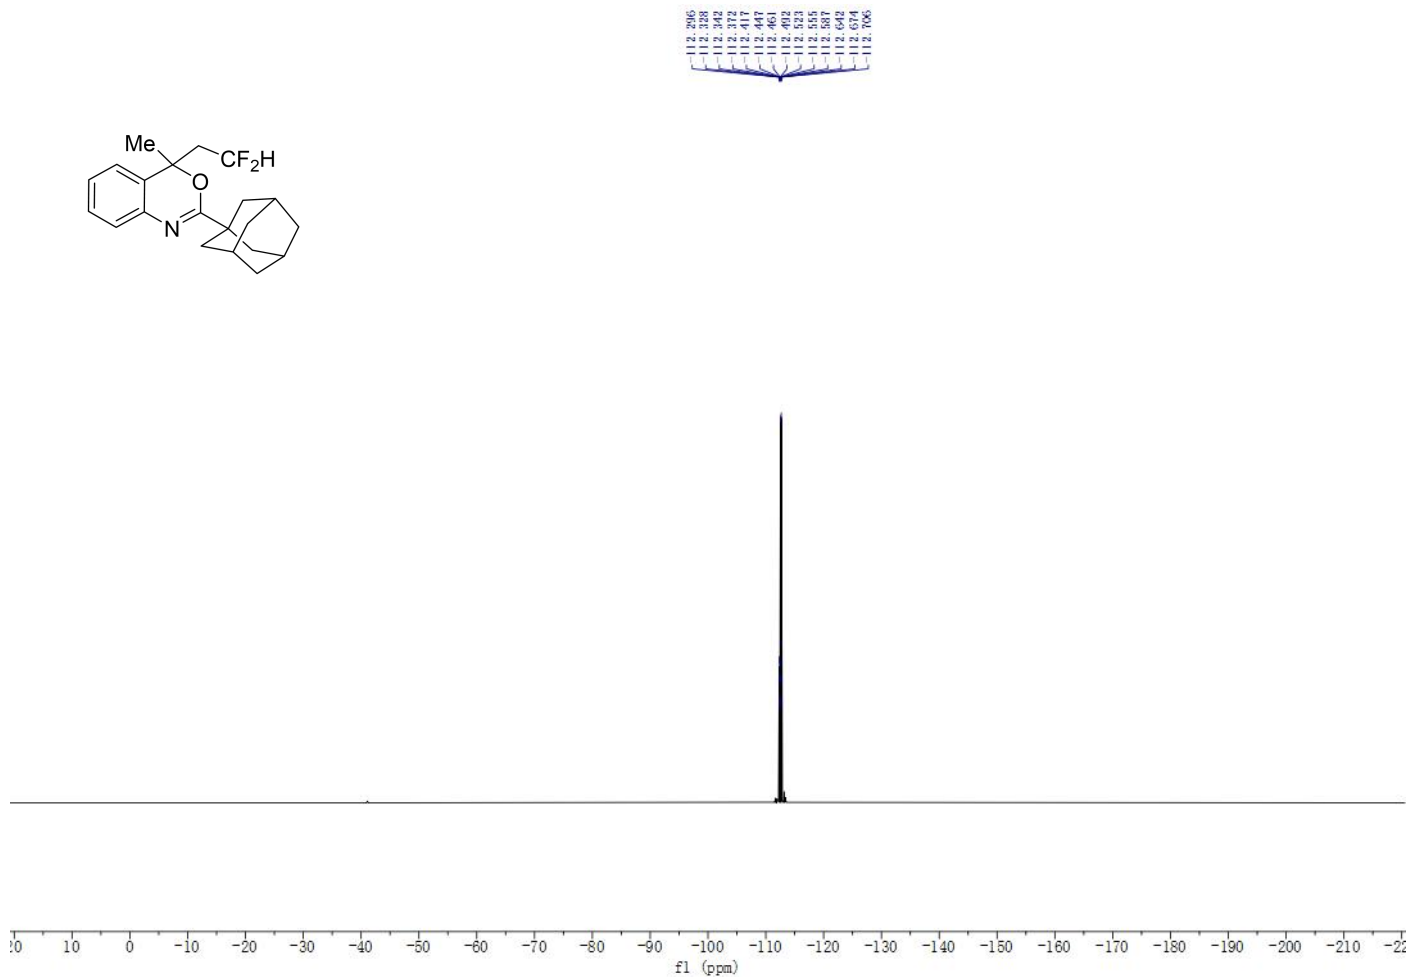

<sup>1</sup>H NMR Spectrum of **3a**

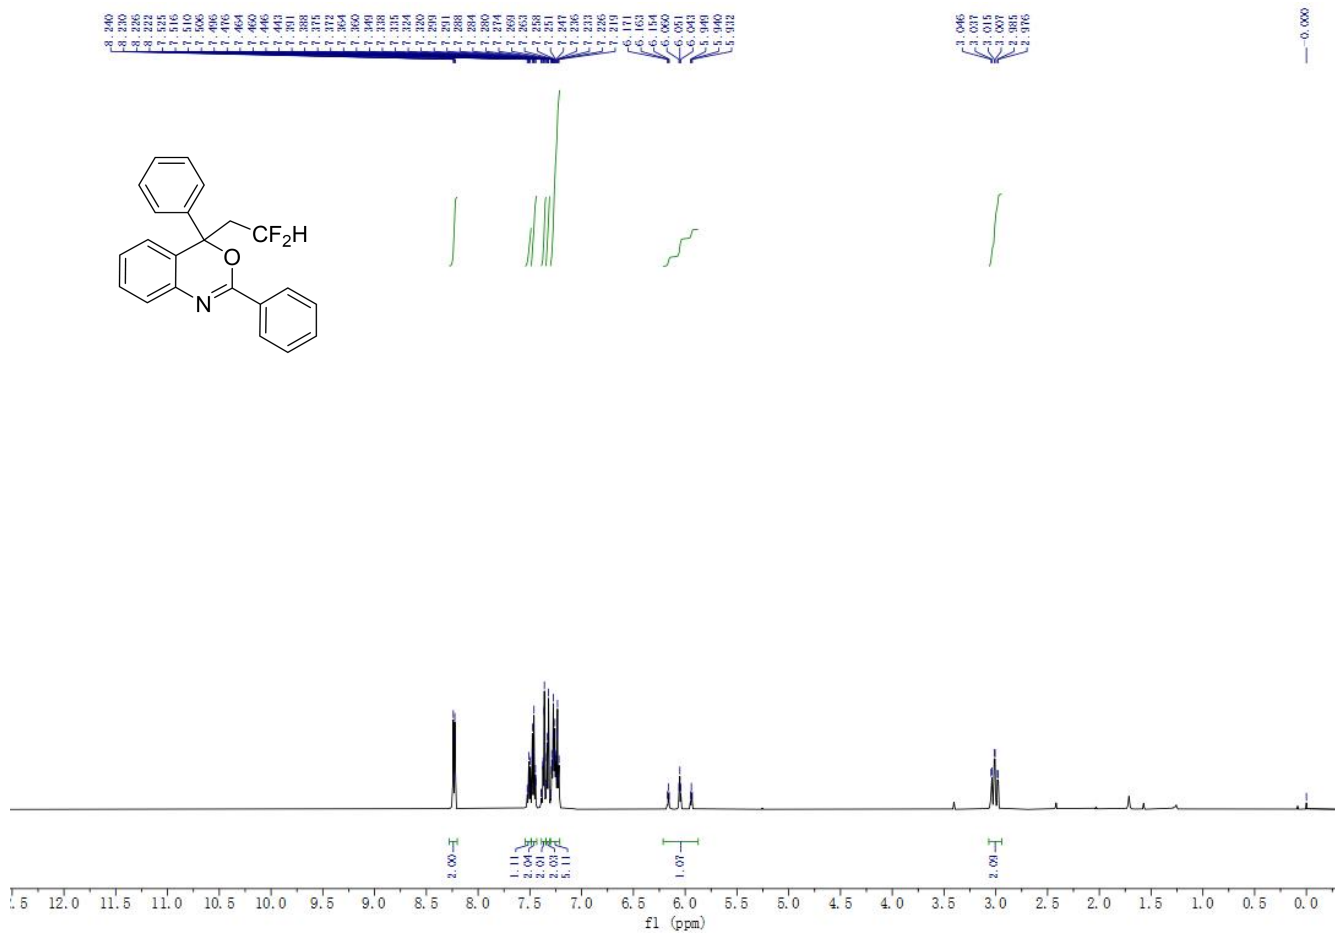

### <sup>13</sup>C NMR Spectrum of **3za**

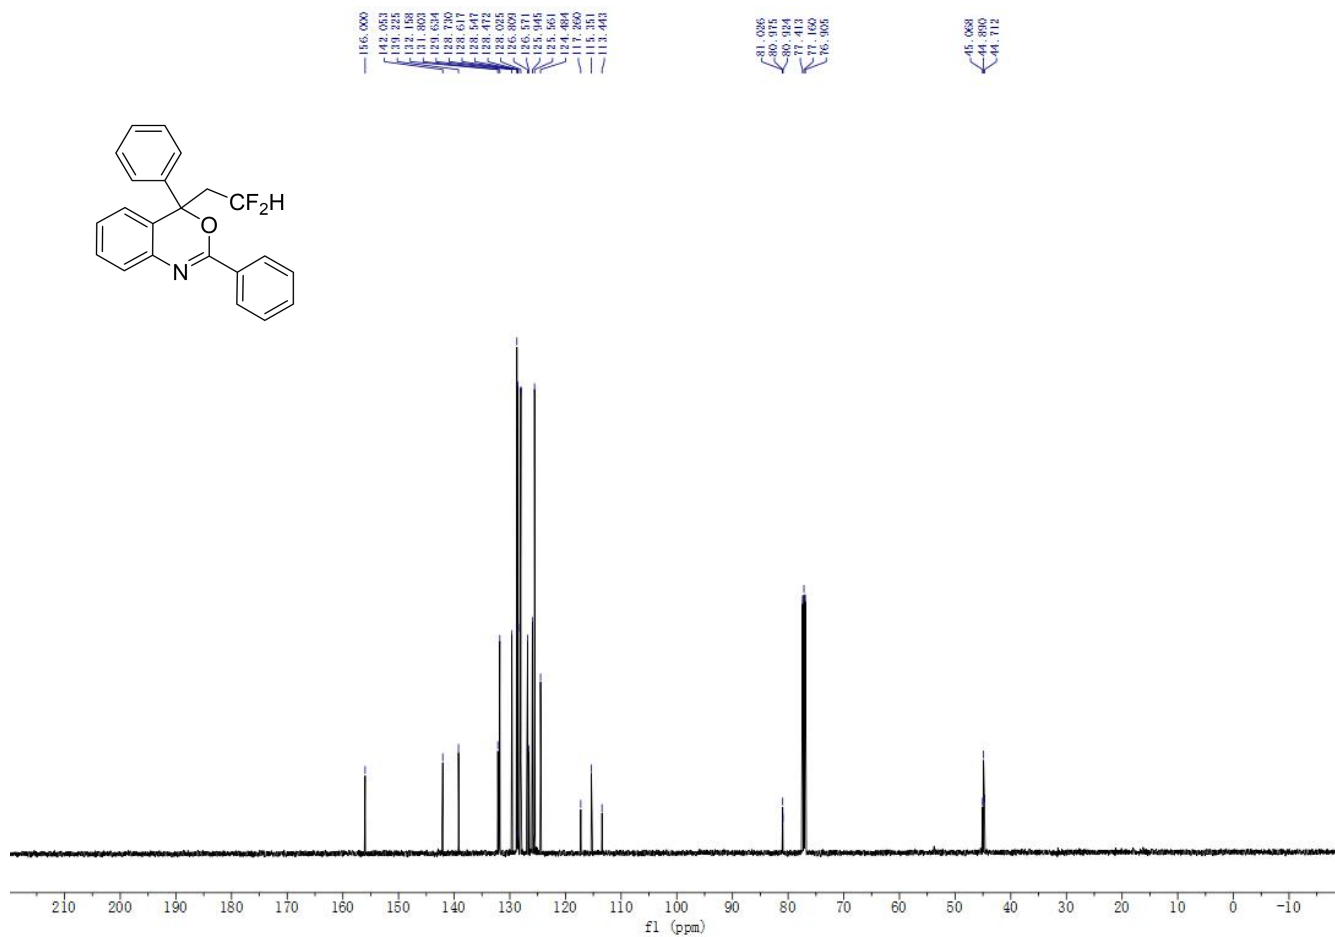

### <sup>19</sup>F NMR Spectrum of **3za**

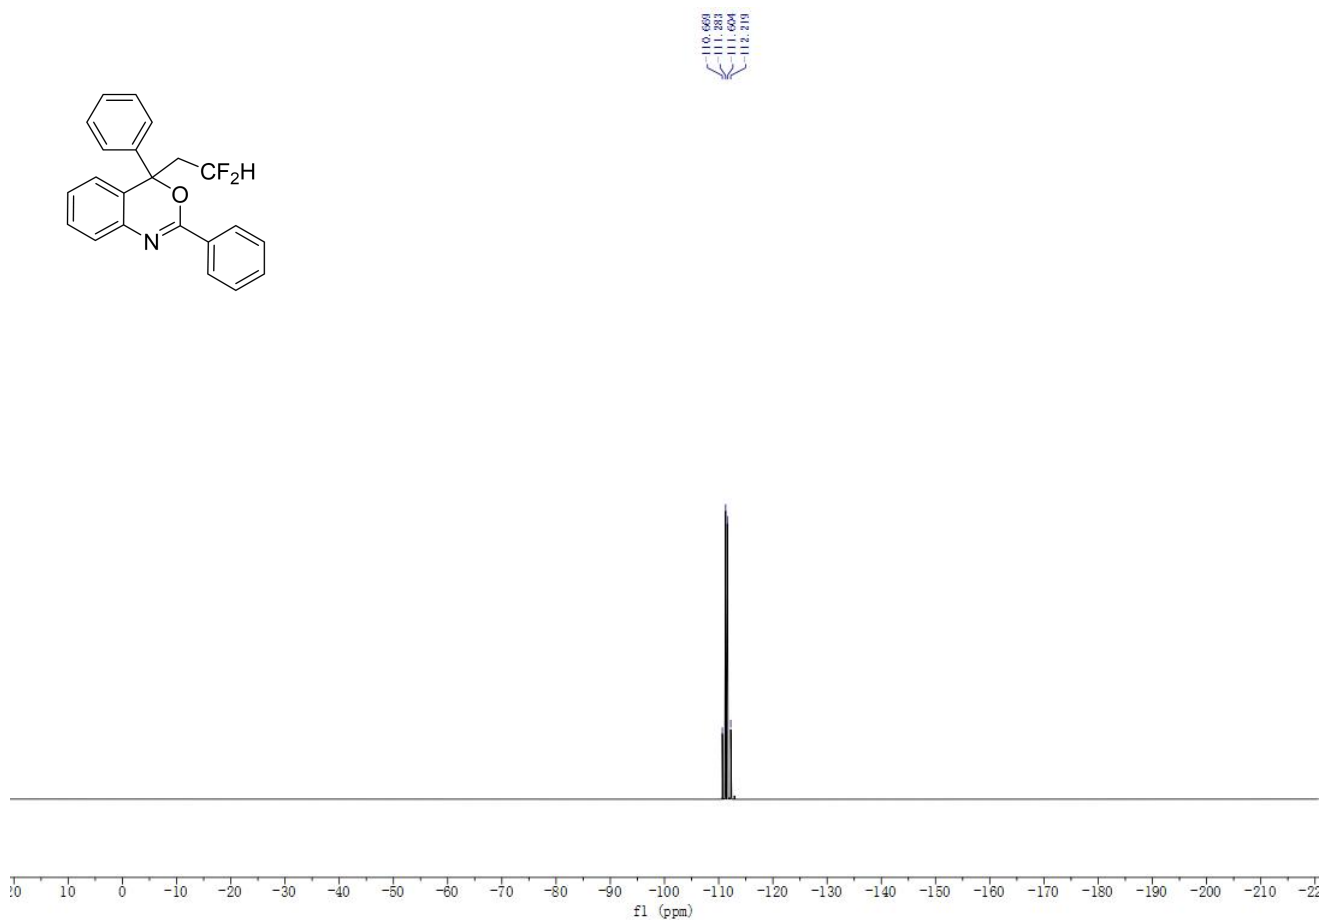



<sup>19</sup>F NMR Spectrum of **3Aa**

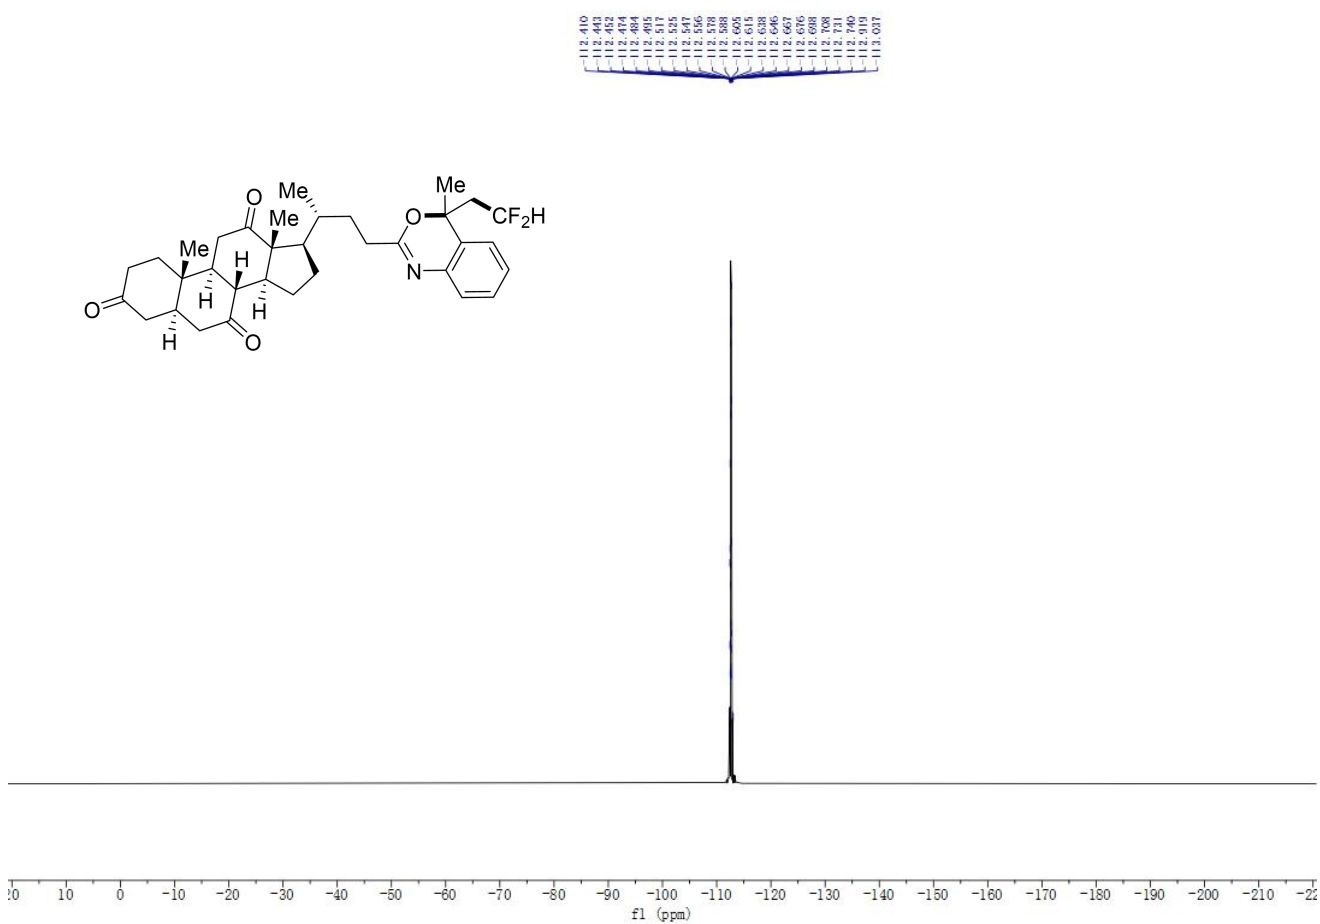

<sup>1</sup>H NMR Spectrum of **3tb**

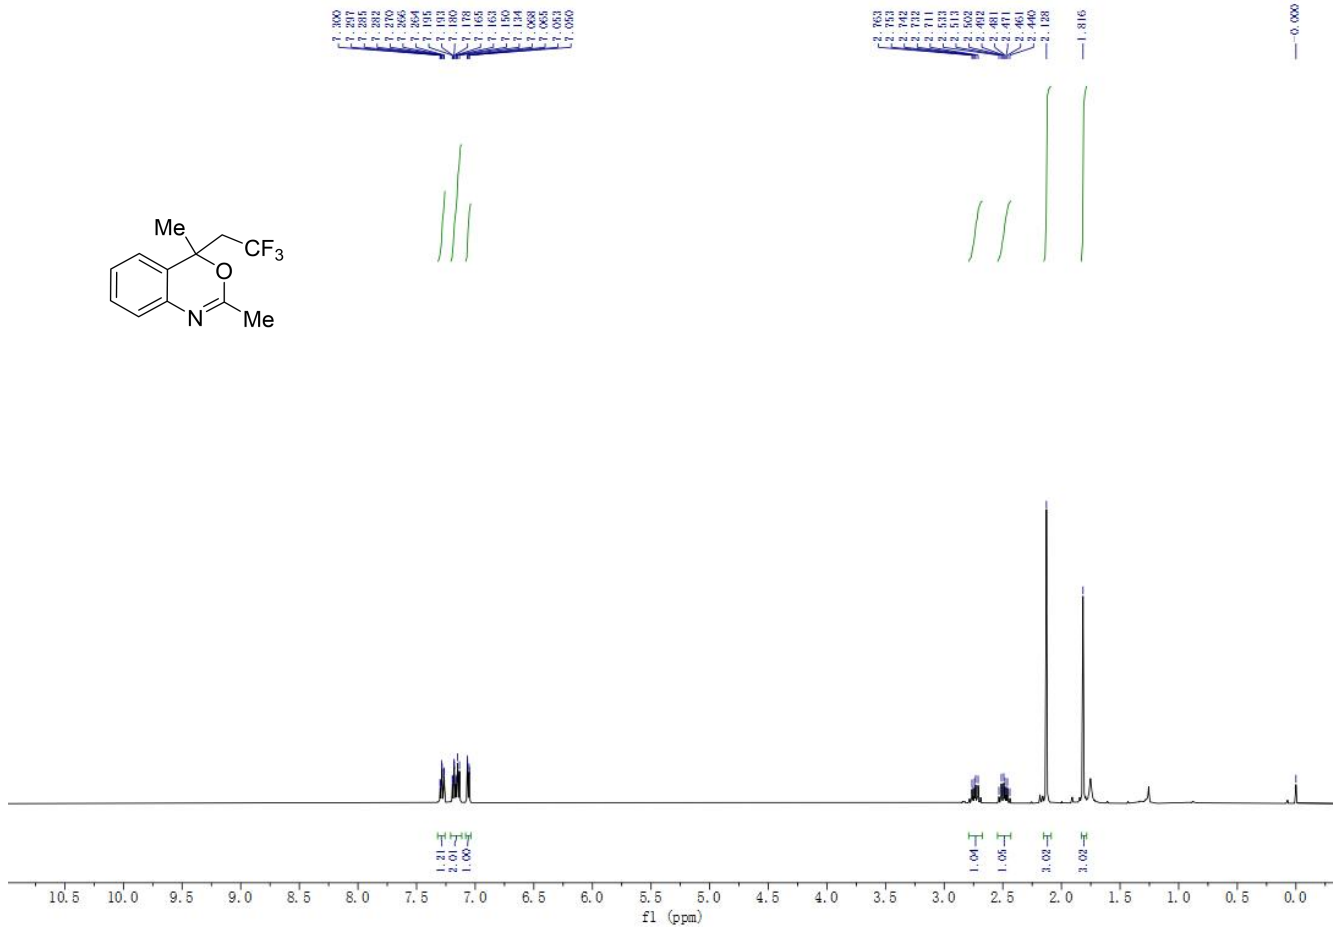



### <sup>13</sup>C NMR Spectrum of **3tb**

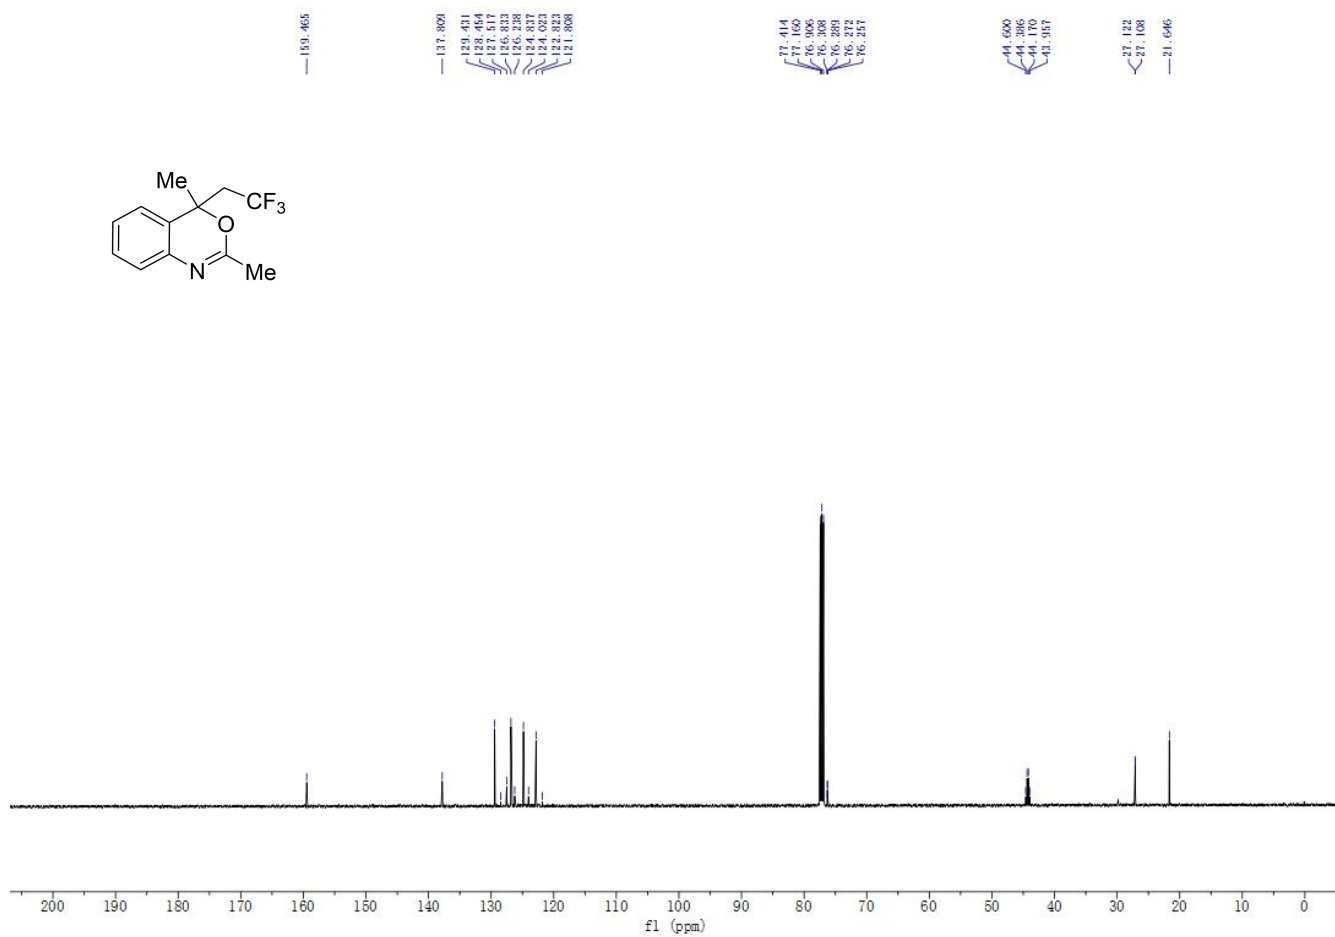

### <sup>19</sup>F NMR Spectrum of **3tb**

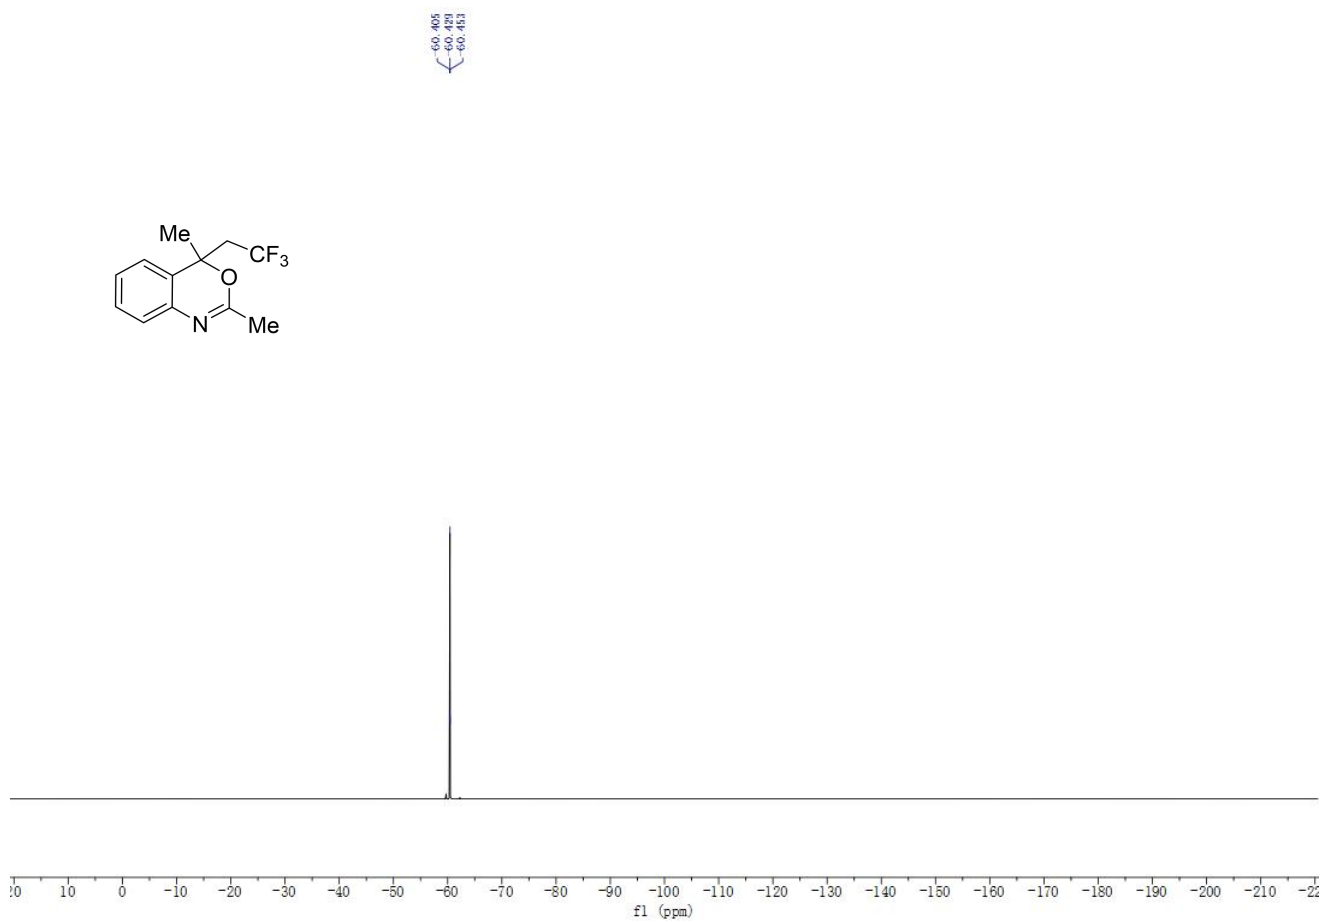

<sup>1</sup>H NMR Spectrum of **3ab**

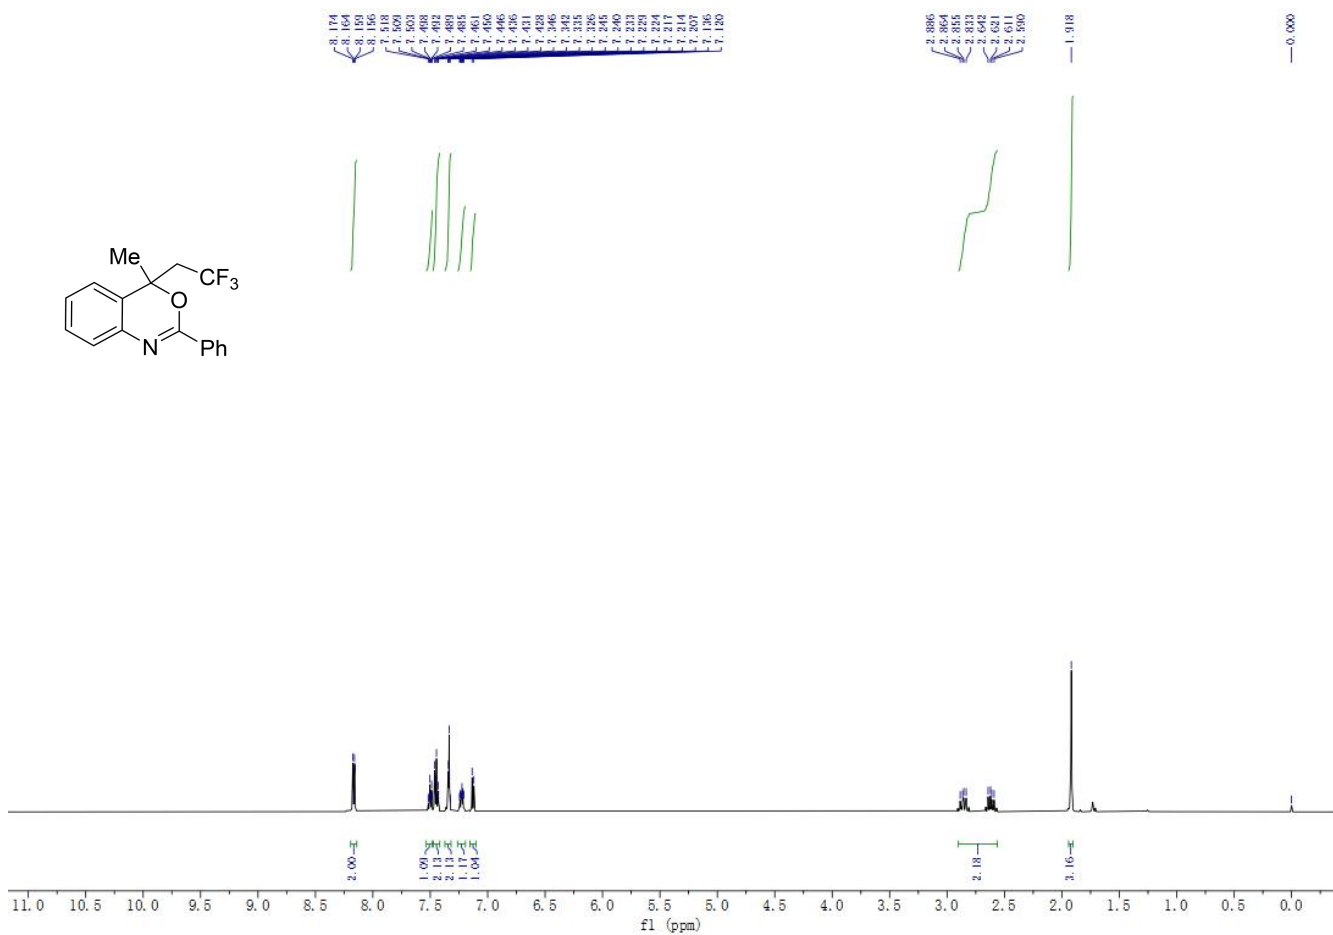

<sup>13</sup>C NMR Spectrum of **3ab**

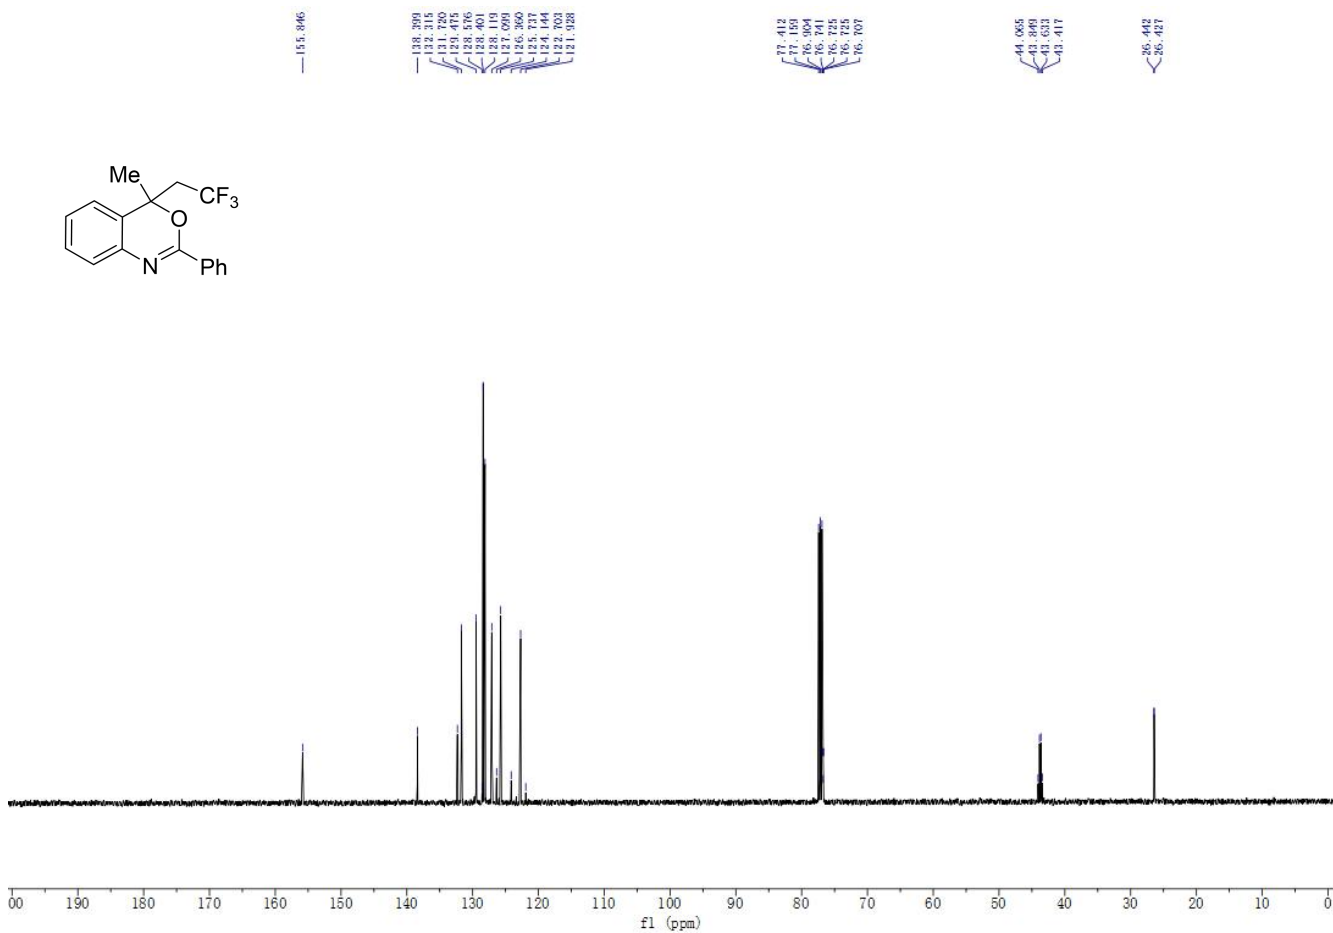

<sup>19</sup>F NMR Spectrum of **3ab**

— 59.875

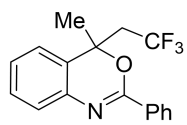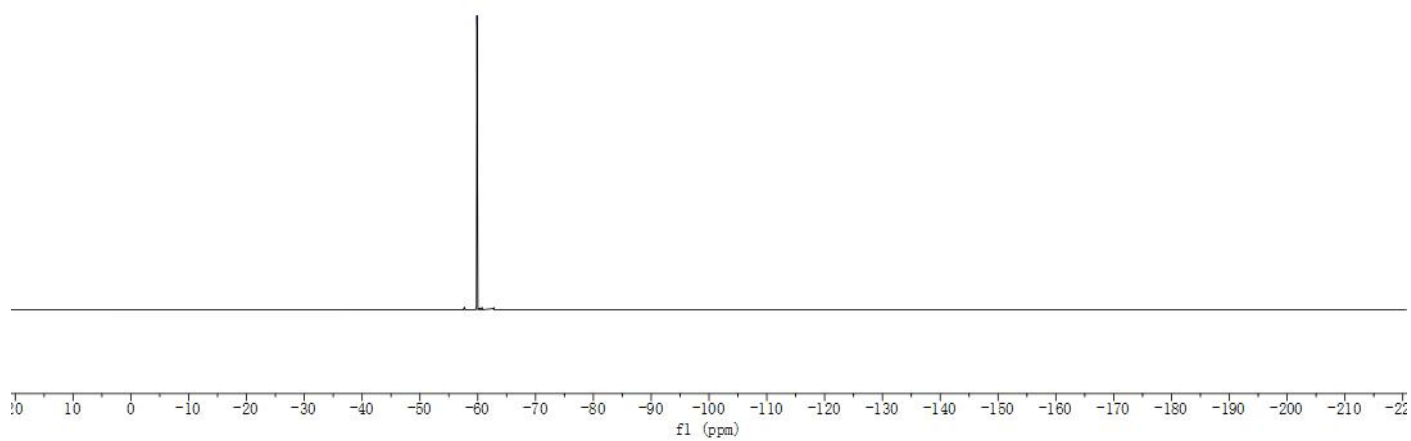

Supplement: d3qo00731f1.pdf [file d3qo00731f1.pdf]
